# Supplementary material for: Crisis within a crisis, COVID-19 knowledge and awareness among the Syrian population: a cross-sectional study
Source: PubMed Central journal article supplement — BMJ Open. 2021 Apr 20;11(4):e043305. doi: 10.1136/bmjopen-2020-043305 (PMC8061566; doi:10.1136/bmjopen-2020-043305), 2021-04-20
Supplement: bmjopen-2020-043305.draft_revisions.pdf [file bmjopen-2020-043305.draft_revisions.pdf]

# BMJ Open

BMJ Open is committed to open peer review. As part of this commitment we make the peer review history of every article we publish publicly available.

When an article is published we post the peer reviewers' comments and the authors' responses online. We also post the versions of the paper that were used during peer review. These are the versions that the peer review comments apply to.

The versions of the paper that follow are the versions that were submitted during the peer review process. They are not the versions of record or the final published versions. They should not be cited or distributed as the published version of this manuscript.

BMJ Open is an open access journal and the full, final, typeset and author-corrected version of record of the manuscript is available on our site with no access controls, subscription charges or pay-per-view fees (<http://bmjopen.bmj.com>).

If you have any questions on BMJ Open's open peer review process please email [info.bmjopen@bmj.com](mailto:info.bmjopen@bmj.com)

# BMJ Open

## **A Crisis within a Crisis: COVID-19 Knowledge and Awareness among the Syrian Population - a national survey assessment**

|                               |                                                                                                                                                                                                                                                                                                 |
|-------------------------------|-------------------------------------------------------------------------------------------------------------------------------------------------------------------------------------------------------------------------------------------------------------------------------------------------|
| Journal:                      | <i>BMJ Open</i>                                                                                                                                                                                                                                                                                 |
| Manuscript ID                 | bmjopen-2020-043305                                                                                                                                                                                                                                                                             |
| Article Type:                 | Original research                                                                                                                                                                                                                                                                               |
| Date Submitted by the Author: | 15-Aug-2020                                                                                                                                                                                                                                                                                     |
| Complete List of Authors:     | Mohsen, Fatema; Syrian Private University Faculty of Medicine, Bakkar, Batoul; Syrian Private University Faculty of Medicine Armashi, Humam; Syrian Private University Faculty of Medicine Daher, Nizar; Syrian Private University Faculty of Medicine; Damascus University Faculty of Medicine |
| Keywords:                     | Public health < INFECTIOUS DISEASES, COVID-19, PUBLIC HEALTH                                                                                                                                                                                                                                    |
|                               |                                                                                                                                                                                                                                                                                                 |

SCHOLARONE™  
Manuscripts

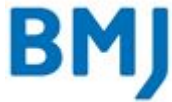

I, the Submitting Author has the right to grant and does grant on behalf of all authors of the Work (as defined in the below author licence), an exclusive licence and/or a non-exclusive licence for contributions from authors who are: i) UK Crown employees; ii) where BMJ has agreed a CC-BY licence shall apply, and/or iii) in accordance with the terms applicable for US Federal Government officers or employees acting as part of their official duties; on a worldwide, perpetual, irrevocable, royalty-free basis to BMJ Publishing Group Ltd ("BMJ") its licensees and where the relevant Journal is co-owned by BMJ to the co-owners of the Journal, to publish the Work in this journal and any other BMJ products and to exploit all rights, as set out in our [licence](#).

The Submitting Author accepts and understands that any supply made under these terms is made by BMJ to the Submitting Author unless you are acting as an employee on behalf of your employer or a postgraduate student of an affiliated institution which is paying any applicable article publishing charge ("APC") for Open Access articles. Where the Submitting Author wishes to make the Work available on an Open Access basis (and intends to pay the relevant APC), the terms of reuse of such Open Access shall be governed by a Creative Commons licence – details of these licences and which [Creative Commons](#) licence will apply to this Work are set out in our licence referred to above.

Other than as permitted in any relevant BMJ Author's Self Archiving Policies, I confirm this Work has not been accepted for publication elsewhere, is not being considered for publication elsewhere and does not duplicate material already published. I confirm all authors consent to publication of this Work and authorise the granting of this licence.

1  
2  
3  
4 1 **A Crisis within a Crisis: COVID-19 Knowledge and Awareness among the**  
5  
6 2 **Syrian Population - a national survey assessment**  
7  
8  
9

10 3  
11  
12 4 **Authors: Fatema Mohsen<sup>1</sup>, Batoul Bakkar<sup>1</sup>, Humam Armashi<sup>1</sup>, Nizar Daher<sup>2,3</sup>**  
13  
14 5

15  
16  
17 6 **Affiliations:**

18  
19  
20  
21 7 1Faculty of Medicine, Syrian Private University, Damascus, Syria.

22  
23 8 2Professor in Infectious Diseases, Department of Internal Medicine, Faculty of Medicine,  
24  
25  
26 9 Damascus University, Damascus, Syria.

27  
28 10 3Professor in Infectious Diseases, Department of Internal Medicine, Faculty of Medicine,  
29  
30  
31 11 Syrian Private University, Rif Dimashq, Syria.  
32

33  
34  
35  
36 13 **Corresponding Author:**

37  
38 14 Fatema Mohsen

39  
40  
41  
42 15 Faculty of medicine, Syrian Private University, Mazzeh Street, P.O. Box 36822, Damascus,

43  
44 16 Syrian Arab republic

45  
46  
47 17 Tel:00963936396590 Email: fatemamohsena@gmail.com  
48  
49

50  
51 18  
52  
53  
54 19 **Abstract:**  
55  
56  
57  
58  
59  
60

1  
2  
3 20 **Objectives:** To gauge specific knowledge around clinical features, transmission pathways,  
4  
5 21 and prevention methods, and to identify factors associated with poor knowledge to help  
6  
7 22 facilitate outbreak management in Syria during this rapid global rise of the COVID-19  
8  
9 23 pandemic. The aim of this study is to examine the Syrian public's awareness and knowledge  
10  
11 24 regarding COVID-19.

12  
13  
14 25 **Design:** Web-based cross-sectional survey.

15  
16  
17 26 **Setting:** This study was distributed randomly in March 2020, nearly 10 years into the Syrian  
18  
19 27 war crisis. The Arabic-language survey was posted on various social media platforms  
20  
21 28 including WhatsApp, Telegram, Instagram, and Facebook targeting various social groups.

22  
23  
24 29 **Participants:** Of 4495 total participants who completed the survey, 3942 were in Syria. 356  
25  
26 30 participants outside of Syria were females and 1142(31.8%) males. The final sample of 3586  
27  
28 31 participants (completion rate=79.8%) consisted of 2444(68.2%) females and 1142(31.8%)  
29  
30 32 males. All participants residing in Syria with no known history of COVID-19 infection were  
31  
32 33 included in the study.

33  
34 34 **Primary and secondary outcome measures:** The study revealed good awareness regarding  
35  
36 35 COVID-19. Poor knowledge was associated with male gender, education of secondary school  
37  
38 36 or lower, careers in government, private, business, military, and "other" sectors, as well as  
39  
40 37 unemployment, poor and moderate economic status, and over 5 household members.

41  
42 38 **Results:** Of the 3586 participants, 68.2% were females, 50.8% were unemployed, and 79.2%  
43  
44 39 were at college-educated. The study revealed good awareness regarding COVID-19 (mean  
45  
46 40 75.6%, SD±9.4%). Multiple linear regression analysis correlated knowledge scores with  
47  
48 41 gender, education level, occupation, economic status, and the number of household members.  
49  
50  
51  
52  
53  
54  
55  
56  
57  
58  
59  
60

1  
2  
3 43 **Conclusion:** This study revealed some potentially troubling knowledge gaps which  
4  
5 44 underscore the need for a vigorous public education campaign. This campaign must reinforce  
6  
7 45 the public's awareness, knowledge, and vigilance towards precautionary measures against  
8  
9 46 COVID-19 and, most importantly aid in controlling the worldwide spread of the disease. A  
10  
11 47 further assessment of attitudes and practice towards COVID-19 is needed.  
12  
13  
14  
15 48

16  
17 49 **Strengths and limitations of this study:**

18  
19 50 This is the first study to measure the awareness and general knowledge of COVID-19 among  
20  
21 51 the Syrian population during a time of war. Our findings can be generalized regarding the  
22  
23 52 Syrian population; however, only for well-educated Syrians of good socio-economic status.  
24  
25 53 Syrians vulnerable to COVID-19 who represented a minority in the survey, such as the  
26  
27 54 elderly and rural residents, are more likely to exhibit poor knowledge and awareness due to  
28  
29 55 limited internet access. Even though all Syrian governorates were represented in this study,  
30  
31 56 the majority of participants lived in Damascus and Rural Damascus.

32  
33 57 . This web-based cross-sectional survey was conducted between March 3<sup>rd</sup> and April 4<sup>th</sup>.

34  
35 58 . The survey's designed questions were modelled after existing surveys.

36  
37 59 . Participation was voluntary and confidentiality and anonymity of responses was assured.

38  
39 60 . The first section of the survey covered socio-demographic information,

40  
41 61 . The second section contained: general knowledge, transmission, symptoms, and prevention.  
42  
43  
44  
45 62

46  
47  
48  
49 63 **Keywords:** Awareness; Knowledge; COVID-19; Pandemic; Syria; War; Population.  
50  
51  
52 64

53  
54  
55 65 **Background:**  
56  
57  
58  
59  
60

1  
2  
3 66 Coronavirus disease 2019 (COVID-19), previously known as 2019 novel coronavirus  
4  
5 67 disease,<sup>(3)</sup> is a highly infectious respiratory disease that evolved into a worldwide pandemic  
6  
7 68 threatening a prolonged economic recession. The first incidence was reported at a local  
8  
9 69 seafood market in Wuhan, China (4). By April 20<sup>th</sup> 2020, the virus had reached 214 different  
10  
11 70 countries and territories and resulted in 3,517,345 cases and 243,401 deaths worldwide.<sup>(5)</sup> On  
12  
13 71 January 30<sup>th</sup> 2020, the World Health Organization (WHO) declared for the sixth time that  
14  
15 72 COVID-19 outbreak is a public health emergency of international concern (PHEIC),  
16  
17 73 prompting the organization to adopt and stipulate drastic global measures to stem the tide of  
18  
19 74 the pandemic.<sup>(6)</sup>

20  
21  
22  
23  
24 75 The battle against COVID-19 in Syria is still in its infancy. The first confirmed case  
25  
26 76 was announced on March 22,<sup>(7)</sup> and there had only been 44 cases and 3 death to date. These  
27  
28 77 figure are significantly lower than neighbouring countries such as Turkey (127,659 and  
29  
30 78 3,461), Iran (98,647 and 6,277), Iraq (2,346 and 98), Lebanon (740 and 25), and Jordan (465  
31  
32 79 and 9).<sup>(5)</sup> The Syrian healthcare system is severely under-equipped and lacks the capacity to  
33  
34 80 contain such a crisis. The estimated number of intensive care unit (ICU) beds with ventilators  
35  
36 81 is mere 325, and the theoretical maximum number of cases that can be adequately treated is  
37  
38 82 only 6,500.<sup>(8)</sup> Once this maximum threshold capacity is exceeded, drastic rationing decisions  
39  
40 83 will have to be made. Therefore, cooperation with and response to guidance from the WHO  
41  
42 84 are of utmost importance. Unprecedented measures have been adopted to control the spread  
43  
44 85 of COVID-19 in Syria including: partial closure of borders; suspension of public  
45  
46 86 transportation; closure of mosques, shops, parks, restaurants universities, and schools;  
47  
48 87 isolation and care of suspected and infected individuals; curfews to limit social contact; and  
49  
50 88 awareness campaigns. The public's adherence to these control measures- which is largely  
51  
52 89 affected by their awareness, knowledge, and attitudes, towards COVID-19- is crucial to  
53  
54 90 mitigating the further spread of the disease.<sup>(9, 10)</sup>

1  
2  
3 91 The Syrian conflict, now in its 10<sup>th</sup> year, has resulted in the worst refugee crisis since  
4  
5 92 World War II.<sup>(11)</sup> The devastating impact of war has placed the public health system under  
6  
7  
8 93 constant strain; the numbers of casualties continues to rise, 70% of health care workers have  
9  
10 94 fled the country, the annihilation of healthcare facilities, and the “weaponization” of the  
11  
12 95 healthcare are ongoing challenges.<sup>(8, 12)</sup> These challenges along with dense residential areas,  
13  
14 96 the growing prevalence of chronic illness, and 83% of the population living under the poverty  
15  
16 97 line make Syria highly vulnerable to a severe outbreak.<sup>(8, 13)</sup>

17  
18  
19 98 While some studies have been conducted to assess the knowledge, attitude, and  
20  
21 99 practices among populations during this pandemic, none have done so in Syria.<sup>(1, 2, 14-19)</sup> To  
22  
23 100 our knowledge this first study that aims to measure the awareness and general knowledge of  
24  
25 101 COVID-19 among the Syrian population at a time where ambiguity and misinformation are  
26  
27 102 rampant. The objective of this study is to gauge specific knowledge around clinical features,  
28  
29 103 transmission pathways, and prevention methods, and to identify factors associated with poor  
30  
31 104 knowledge to help facilitate outbreak management in Syria during this rapid global rise of the  
32  
33 105 COVID-19 pandemic.  
34  
35  
36  
37  
38  
39  
40

## 41 107 **Methods:**

### 42 43 44 108 **Study design, setting and participants:**

45  
46  
47 109 This web-based cross-sectional survey was conducted between March 3<sup>rd</sup> and April  
48  
49 110 4<sup>th</sup>. Ethical approval was obtained from the Institutional Review Board (IRB) of the Faculty  
50  
51 111 of Medicine, Syrian Private University. All participants residing in Syria with no known  
52  
53 112 history of COVID-19 infection were included in the study. The authors designed questions  
54  
55 113 that were modelled after existing surveys.<sup>(1, 2)</sup> We conducted a pilot study on 20 people to  
56  
57 114 assess clarity, relevance, and the acceptability of the survey; these were excluded from the  
58  
59  
60



1  
2  
3 115 final sample to avoid bias. Modifications were made based on feedback received to facilitate  
4  
5 116 better comprehension before distributing the final survey to the general population. The  
6  
7  
8 117 Arabic-language survey was posted on various social media platforms including WhatsApp,  
9  
10 118 Telegram, Instagram, and Facebook targeting various social groups. Participants confirmed  
11  
12 119 their voluntarily participation by answering a yes-no question, were informed of the option to  
13  
14 120 opt-out of the survey at any time, and were assured of the confidentiality and anonymity of  
15  
16 121 their responses. After confirmation, participants were directed to the first part of the survey to  
17  
18 122 complete questions about socio-demographic information including, age, gender, residence,  
19  
20 123 education level, occupation, and economic status. Participants under the age of 18 required  
21  
22 124 informed parental consent, as well as submission of parent/guardian contact information. The  
23  
24 125 researchers were responsible for contacting the parents/guardians to obtain consent before the  
25  
26 126 child was given access to the survey. The self-administered survey contained 40 questions  
27  
28 127 divided into 4 sections: general knowledge (10 questions), transmission pathways (7  
29  
30 128 questions), clinical features (12 questions), and prevention methods (11 questions). The  
31  
32 129 survey is available in appendix 1.  
33  
34  
35  
36  
37  
38

### 39 **Patient and public involvement:**

40  
41  
42 131 The public's priorities, experience, and preferences were assessed through a pilot study  
43  
44 132 before administering the survey to the community. The public were involved in this study  
45  
46 133 through various social-media platforms. We encouraged the public to share the survey link  
47  
48 134 with family members and friends; however, participants were not involved in the conduct of  
49  
50 135 the study. The results of the survey were analyzed using Statistical Package for Social  
51  
52 136 Sciences version 25.0 (SPSS Inc., Chicago, IL, United States) to correlate mean knowledge  
53  
54 137 scores of participants with socio-demographic factors. We also identified participants factors  
55  
56  
57  
58  
59  
60

1  
2  
3 138 associated with poor knowledge. Participant advisors including those in the pilot study were  
4  
5 139 deeply thanked. Patients were not involved in this study.  
6  
7

## 8 140 **Statistical analysis**

9  
10  
11  
12 141 Data was analyzed using the Statistical Package for Social Sciences version 25.0  
13  
14 142 (SPSS Inc., Chicago, IL, United States) and reported as frequencies and percentages (for  
15  
16 143 categorical variables) or means and standard deviations (SD) (for continuous variables). One-  
17  
18 144 way analysis of variance (ANOVA), t-test, or Chi-square test was applied to compare mean  
19  
20 145 knowledge scores against socio-demographic variables. Multivariable linear regression  
21  
22 146 analysis using the socio-demographic variables as independent variables and mean  
23  
24 147 knowledge score as the outcome variable was conducted to identify factors associated with  
25  
26 148 knowledge. P-values<0.05 was considered statistically significant.  
27  
28  
29  
30

31 149

## 32 33 34 150 **Results:**

### 35 36 37 151 **Socio-demographics characteristics:**

38  
39  
40 152 Of 4495 total participants who completed the survey, 3942 were in Syria. 356  
41  
42 153 participants outside of Syria were excluded. The final sample of 3586 participants  
43  
44 154 (completion rate=79.8%) consisted of 2444(68.2%) females and 1142(31.8%) males.  
45  
46 155 Participants aged 16-30 years were the majority 2789(77.8%) while participants under 16  
47  
48 156 were the minority 59(1.6%). Participant ages ranged from 12-78 years with the majority  
49  
50 157 being 19(mean=30 ±10 years), single 2279(63.6%), and unemployed 1822(50.8%).  
51  
52 158 1064(29.7%) participants were smokers, and 428(11.9%) were alcohol consumers (Table 1).  
53  
54 159 The majority of participants were residents of Damascus/Rural Damascus 2019(56.3%), and  
55  
56 160 had attained college/university level education (Figure1).  
57  
58  
59  
60

### 161 **General Knowledge regarding COVID-19:**

162 Participants showed a good level of awareness regarding COVID-19 (75.6%). An  
163 adequate level of basic knowledge (67.0%) was found among participants (Table 2),  
164 3383(94.3%) knew that a virus was the causative agent of COVID-19; 2535(70.7%) correctly  
165 identified the incubation period as being between 2 days and 2 weeks. Only 1500(41.8%)  
166 knew that an infection with COVID-19 does not confer lifelong immunity. The majority of  
167 participants 3489(97.3%) were aware that COVID-19 infection in high risk groups can be  
168 fatal. There is currently insufficient evidence on whether infertility is a complication of  
169 COVID-19 infection; 461(12.9%) participants believed that COVID-19 can cause infertility  
170 while 1903(53.0%) did not. 2986(83.3%), and 2597(72.4%) correctly answered that there are  
171 currently no available vaccine or treatments; however, there were misconceptions about the  
172 efficacy of antibiotics and Ibuprofen as treatments, 1228(34.2%) and 1268(35.3%)  
173 respectively (Table 3).

### 174 **Transmission and Signs and Symptoms regarding COVID-19:**

175 There was a fair level of awareness (70.7%) regarding COVID-19 transmission  
176 pathways (Table 2). A high level of awareness was demonstrated regarding common  
177 transmission pathways: 3521(98.2%), 3387(94.4%), and 3330(92.9%) identified respiratory  
178 droplets, touching an infected person's personal belongings, and handshaking respectively.  
179 There is currently limited evidence on animal-to-human and sexual transmission; 703(19.6%)  
180 did not know if transmission occurs between animals and humans, while 899(25.1%) did not  
181 know if the virus is transmitted sexually (Table 4).

182 The data showed a good level of awareness (76.0%) regarding clinical features (Table  
183 2). When asked about the main clinical features, participants correctly identified, fever  
184 3563(99.4%), sore throat 3037(84.7%), headache 3186(88.8%), chest pain 3050(85.0%),

1  
2  
3 185 general pain 3019(84.2%), fatigue 3405(95.0%), and dry cough 3466(96.7%), whereas only  
4  
5 186 1972(55.0%) knew that diarrhea can be a symptom. Only 2221(61.9%) were aware that  
6  
7 187 infected individuals may be asymptomatic (Table 4).  
8  
9

### 11 188 **Prevention Methods regarding COVID-19:**

13 189 The highest level of awareness was in the prevention section (88.8%) (Table 2).  
14  
15 190 Washing hands with soap, avoiding crowded areas, remaining at home, and wearing a face  
16  
17 191 mask outside are the principal preventative measures against COVID-19, 3574(99.7%),  
18  
19 192 3574(99.75%), 3554(99.1%), and 3204(89.3%), respectively. A minority 158(4.4%)  
20  
21 193 believed that cleaning with a mixture of Flash and bleach is a sound preventive measure.  
22  
23 194 Only 2482(69.2%) knew that the flu vaccine offers no protection against COVID-19 (Table  
24  
25 195 5).  
26  
27  
28  
29

### 30 196 **Comparison Study:**

32 197 A series of one way ANOVA analyses revealed that mean knowledge differed  
33  
34 198 significantly across: gender (p-value=0.009) (Figure 2), age (p-value=0.003), social status (p-  
35  
36 199 value=0.042), education level (p-value=0.000), economic status (p-value=0.000), number of  
37  
38 200 household members (p-value=0.000) (Table 4). The data showed a significant correlation  
39  
40 201 between mean knowledge and place of residence (p-value=0.000). Participants living in  
41  
42 202 Lattakia (77.6%) exhibited the greatest awareness, whereas those in Ar-Raqqah (71.7%)  
43  
44 203 followed by Deir-ez-Zor (71.8%) exhibited the lowest (Figure 3).  
45  
46  
47  
48

49 204 Participants acquired their information from the following source(s): Social media,  
50  
51 205 1998(55.7%); health websites, 2823(78.7%); television/radio, 1572(43.8%); family  
52  
53 206 members/friends, 528(14.7%); magazines/books, 266(7.4%); and lectures, 517(14.4%).  
54  
55 207 Participants with the lowest awareness acquired their information from family  
56  
57 208 members/friends (74.0%), whereas those with the highest awareness acquired their  
58  
59  
60

1  
2  
3 209 information from lectures (78.2%), (p-value=0.000), (Figure 4). When participants were  
4  
5 210 asked if they were likely to share new information with friends and family, 3513(98.0%)  
6  
7 211 answered “yes”. There was a significant difference in mean knowledge between those who  
8  
9 212 were inclined to disseminate new information about COVID-19 to friends and family  
10  
11 213 (75.7%) compared with those who were not (72.3%) (p-value=0.002). On exclusive use of  
12  
13 214 personal belongings, 2692(75.1%) answered “yes”. We found no significant correlation  
14  
15 215 between mean knowledge and participant tendency to share personal belongings with others  
16  
17 216 (p-value=0.112). Participants who knew someone infected with COVID 19, 65(1.8%)  
18  
19 217 answered “yes”. There was no significant difference in mean knowledge between those who  
20  
21 218 knew an infected individual (75.9%) compared with those who did not (75.6%) (p-  
22  
23 219 value=0.816).

### 220 **Multiple linear regression:**

221 Multiple linear regression analysis results: male gender (vs. female, p=0.005);  
222 education of secondary school or lower (vs. college/university and above, p=0.000); careers  
223 in government, private, business, military, and “other” sectors, as well as unemployment  
224 (vs. health care workers, p=0.000); poor and moderate economic status (vs. good and  
225 excellent, p<0.040), and over 5 household members (vs. of 1-5, p=0.000) were associated  
226 with significantly lower knowledge scores (Table 7). Careers in health care (vs. Unemployed,  
227 p-value=0.000), and the 31-45 age group (vs. 16-30, p-value=0.005) were associated with  
228 significantly higher knowledge scores.

### 230 **Discussion:**

1  
2  
3 231 We found an overall mean knowledge score of 75.6%, indicating that most  
4  
5 232 participants were relatively knowledgeable about COVID-19, though less so compared to  
6  
7  
8 233 their counterparts in China (90%).<sup>(1)</sup> This level of knowledge was unexpected given that  
9  
10 234 when we carried out the survey, only 10 cases of COVID-19 had been confirmed in Syria.<sup>(20)</sup>  
11  
12

13 235 We found that poor knowledge was associated with males, non-post-secondary  
14  
15 236 education, non-healthcare occupations, unemployment, poor and moderate economic status,  
16  
17  
18 237 and households exceeding 5 members (Table 5). Similar trends were observed in China.<sup>(1)</sup>  
19  
20 238 Correlating socio-demographic variables with awareness is critical to public health efforts to  
21  
22 239 mitigate the spread of COVID-19. This data obtained can be leveraged by the Syrian Ministry  
23  
24  
25 240 of Health to tailor prevention and educational campaigns to populations with the widest  
26  
27 241 knowledge gaps.  
28

29 242 In the general knowledge section (67%), the majority of the participants 3383(94.3%)  
30  
31 243 knew that COVID-19 is caused by a virus, similar to a Pakistani study (93.3%).<sup>(17)</sup> Low  
32  
33 244 awareness of the 2 to 14 day incubation period was found,<sup>(21)</sup> among dentists (36.1%), and  
34  
35 245 health care workers (HCW) (36.4%).<sup>(2, 19)</sup> Our study showed a higher level of awareness  
36  
37  
38 246 2535(70.7%) among the population. Syria has a relatively young population; 2018 showed  
39  
40  
41 247 that only 4.5% of the population was over 65.<sup>(22)</sup> 3489(97.3%) knew that COVID-19 infection  
42  
43 248 can be severe and lead to death in elderly, chronically ill, and immunodeficient patients. This  
44  
45 249 is higher than studies conducted in China (73.2%), and India (88.37%).<sup>(1, 23)</sup> 40.6% of Syrians  
46  
47  
48 250 are hypertensive, yet a staggering 79.8% of them are unaware of their condition. Diabetes is  
49  
50 251 also prevalent, affecting 11.9% of the population.<sup>(24, 25)</sup> Such a rampant lack of awareness  
51  
52 252 about chronic disease in the population can be fatal, and underscores the need for targeted  
53  
54  
55 253 awareness campaigns.  
56  
57  
58  
59  
60

1  
2  
3 254 Only 2597(72.4%) participants knew that there is currently no available treatment;  
4  
5 255 this is higher than a Kenyan study (40%) but significantly lower than a Chinese study  
6  
7 256 (94%).<sup>(1, 15)</sup> A minority 103(2.9%) participants thought there was a vaccine available against  
8  
9 257 COVID-19; by contrast, Coimbatore District (18.6%) and Pakistan (11.6%) were  
10  
11 258 misinformed. In the absence of a vaccine or effective treatment protocol for COVID-19,  
12  
13 259 controlling the spread of the disease is the best line of defense. We observed a considerable  
14  
15 260 knowledge gap in 1268(35.3%) with regards to ibuprofen as a treatment option. There is no  
16  
17 261 available evidence to suggest that ibuprofen is effective against COVID-19.<sup>(26)</sup>

18  
19 262 Participants showed a fair level of awareness regarding transmission pathways  
20  
21 263 (70.7%), very similar to a Pakistani study (70.8%).<sup>(17)</sup> The majority 3521(98.2%) of  
22  
23 264 participants were aware that respiratory droplets are common transmission vectors this is  
24  
25 265 similar to a Chinese study (97.8%), but much higher than an Indian study (29.5%).<sup>(1, 16)</sup> WHO  
26  
27 266 advise on physical distancing include: using greetings that replace physical contact with a  
28  
29 267 wave, nod, bow, peace sign, sign language, friendly words or smiles.<sup>(27, 28)</sup> 3330(92.9%)  
30  
31 268 participants identified handshaking as a transmission pathway, higher than a study among  
32  
33 269 dentists (85.6%).<sup>(2)</sup>

34  
35 270 A good level of awareness was found regarding the clinical features of COVID-19  
36  
37 271 (76.0%), similar to a Pakistani (77.7%).<sup>(17)</sup> A very high level of awareness of the most  
38  
39 272 common symptoms was found: fever 3563(99.4%), dry cough 3466(96.7%), fatigue  
40  
41 273 3405(95.0%), and myalgia 3019(84.2%), similar to findings from Chinese (96.4%) and  
42  
43 274 Indian (95.4%) studies.<sup>(1, 23)</sup> When asked about sore throat, a higher level of awareness  
44  
45 275 3037(84.7%) was found compared to studies from India (15.2%) and among dentists  
46  
47 276 (28.5%).<sup>(2, 16)</sup> Knowledge about diarrhea as a symptom was lacking: only 1972(55.0%); a  
48  
49 277 study among dentists also showed low awareness (39.9%).<sup>(2, 16)</sup> While infected individuals  
50  
51 278 are frequently asymptomatic, or present with mild symptoms, around 1 in every 5 infections  
52  
53  
54  
55  
56  
57  
58  
59  
60



1  
2  
3 279 can be serious enough to require hospitalisation.<sup>(6, 29)</sup> Only 2221(61.9%) participants were  
4  
5 280 aware that infected individuals can be asymptomatic, while a study among dentists (34.5%)  
6  
7 281 reported much lower awareness. “Silent spreaders” may significantly contribute to the  
8  
9 282 transmission of COVID-19, and so increasing public awareness of this particular point is  
10  
11 283 crucial  
12  
13

14 284 We found a high level of awareness in the preventive methods section (88.8%),  
15  
16 285 similar to a study in Pakistan (85%).<sup>(17)</sup> Hand hygiene is considered an important element of  
17  
18 286 infection control dating back to the revolutionary work of Ignaz Semmelweis.<sup>(30)</sup>  
19  
20 287 Implementing hand-washing techniques can break the transmission cycle and reduce the risk  
21  
22 288 of infection by 6%-44%.<sup>(31)</sup> Almost all 3574(99.7%) participants were aware that washing  
23  
24 289 hands with soap and water is an important preventive measure against COVID-19. This  
25  
26 290 finding is in accordance with India (97.0%), and other studies (96.2%, and 87%).<sup>(2, 16, 19)</sup>  
27  
28  
29

30 291 This year the WHO recommended that the following mitigation measures be  
31  
32 292 implemented during the holy month of Ramadan: cancelling social and religious gatherings,  
33  
34 293 holding events outdoors for adequate ventilation, physical distancing of at least 1 meter  
35  
36 294 between people, and the use of technology to broadcast ceremonies on television.<sup>(27, 28)</sup> The  
37  
38 295 majority 3574(99.7%) identified avoiding mass gatherings as a preventive measure; studies in  
39  
40 296 China (98.6%) and Coimbatore District (97.7%) reported similar awareness.<sup>(1, 23)</sup> Cheap and  
41  
42 297 efficient interventions such as N95 (filtration capacity=95%) have a 91% effectiveness of  
43  
44 298 blocking pathogen transmission.<sup>(32)</sup> 3204(89.3%) participants considered wearing a face mask  
45  
46 299 when leaving home as an effective prevention method, compared with a Coimbatore District  
47  
48 300 study (93.02%).<sup>(23)</sup>  
49  
50  
51  
52

53 301 Since Syrian society is particularly vulnerable to COVID-19, this knowledge gap is  
54  
55 302 potentially dangerous and should be addressed to mitigate disease spread. Only 2482(69.2%)  
56  
57 303 knew that the flu vaccine offers no protection against COVID-19; this is similar to a  
58  
59  
60



1  
2  
3 304 Coimbatore District study (67.4%), but lower than a study amongst HCWs (90.7%).<sup>(19, 23)</sup>  
4  
5 305 Mixing flash with bleach is highly toxic and caustic to the respiratory tract. Only a minority  
6  
7  
8 306 of participants 158(4.4%) believed that this method of cleaning is a sound  
9  
10 307 preventive measure. 3305(92.2%) were aware that individuals showing symptoms should  
11  
12 308 quarantine themselves, lower than in China (98.2%) and India (95.8%).<sup>(1, 16)</sup>  
13

14  
15 309 North-East Syria (NES) has a population of over 4 million people, 600,000 of whom  
16  
17 310 are internally displaced refugees, 100,000 of whom live in overcrowded camps: only 2 of  
18  
19 311 NES's 11 hospitals are currently functioning. NES consists of 3 governorates: Ar-Raqqah,  
20  
21 312 Deir-ez-Zor and Al-Hasakah. With only 22 ICU beds, (18 in Al-Hasakah, 4 in Ar-Raqqah  
22  
23 313 and none in Deir-ez-Zor), the maximum capacity threshold is only 80 COVID-19 cases. Ar-  
24  
25 314 Raqqa and Deir-ez-Zor, the most vulnerable governorates, also showed the lowest awareness  
26  
27 315 in the study (71.7%), and (71.8%). This is a potentially catastrophic situation, and a concern  
28  
29 316 to the international community, as an unmonitored, uncontrolled outbreak in NES can  
30  
31 317 prolong the global pandemic.  
32  
33  
34  
35  
36  
37  
38

### 39 **Limitations:**

40  
41  
42 320 Our findings can only be generalized about well-educated Syrians of good socio-  
43  
44 321 economic status. Syrians vulnerable to COVID-19, such as the elderly and rural residents, are  
45  
46 322 more likely to exhibit poor knowledge and awareness due to limited internet access. As such,  
47  
48 323 reaching out to these populations must be prioritized. Even though all Syrian governorates  
49  
50 324 were represented in this study, the majority of participants lived in Damascus and Rural  
51  
52 325 Damascus. Furthermore, assessment of attitudes and practice towards COVID-19 is needed,  
53  
54 326 which should be developed as either a web-based survey, or phone interviews, and  
55  
56 327 constructed using multi-dimensional scaling.  
57  
58  
59  
60

1  
2  
3 328  
4  
5  
67 **Conclusion:**  
8  
9

10 330 COVID-19 has been a dire warning to humanity about the fragility of its social,  
11  
12 331 economic, and healthcare institutions. Our study revealed good public awareness of clinical  
13  
14 332 features and preventive measures. However general knowledge and knowledge about  
15  
16 333 transmission pathways was suboptimal. Syrians of good socio-economic status, in particular  
17  
18 334 young well-educated women, have shown good knowledge. Our national response must adapt  
19  
20 335 to the growing threat of COVID-19 by adopting public awareness strategies and behaviours  
21  
22 336 to contain the disease both within and beyond our borders.  
23  
24  
25

26 337  
27  
28  
29

30 338 **Abbreviations:** COVID-19: Coronavirus Disease 2019; MERS: Middle East Respiratory  
31  
32 339 Syndrome; SARS: Severe Acute Respiratory Syndrome; WHO: World Health Organization;  
33  
34 340 PHEIC: Public Health Emergency of International Concern; ICU: Intensive care unit; IRB:  
35  
36 341 Institutional Review Board; SPSS: Statistical Package for Social Sciences; SD: Standard  
37  
38 342 Deviation; HCW: Health Care Worker.  
39  
40  
41

42 343  
43  
44  
4546 **Acknowledgments:**  
47  
48

49 345 We are thankful to the management of the Syrian Private University for the support in  
50  
51 346 the field of medical training and research. We are thankful to everyone who participated in  
52  
53 347 this study and for Mrs. Marah Muarrawi for her statistical help.  
54  
55

56 348  
57  
58  
5960 **Funding:**

1  
2  
3 350 This research received no specific grant from SPU or any other funding agency in the  
4  
5 351 public, commercial or non-profit sectors.  
6  
7  
8 352

9  
10  
11  
12 353 **Availability of data and materials:**

13  
14 354 All data related to this paper's conclusion are available and stored by the authors. All  
15  
16 355 data are available from the corresponding author on a reasonable request.  
17  
18  
19 356

20  
21  
22  
23 357 **Declarations:**

24  
25 358 **Ethics approval and consent to participate:**

26 359 This study was approved by the Institutional Review Board (IRB) at the Syrian  
27  
28 360 Private University (SPU). All Participants confirmed their written consent by answering a  
29  
30 361 yes-no question. Participants under the age of 18 required verbal informed parental consent,  
31  
32 362 as well as submission of parent/guardian contact information. The researchers were  
33  
34 363 responsible for contacting the parents/guardians to obtain verbal consent before the child was  
35  
36 364 given access to the survey. The verbal and written form of consent was approved by the IRB  
37  
38 365 at SPU. Participation in the study was voluntary and participants were assured that anyone  
39  
40 366 who was not inclined to participate or decided to withdraw after giving consent would not be  
41  
42 367 victimized. All information collected from this study was kept strictly confidential.  
43  
44  
45  
46  
47

48 368 **Consent for Publication:**

49 369 Not applicable.

50  
51 370 **Competing interests:**

52 371 The authors declare that they have no competing interests.  
53  
54  
55

56 372 **Authors' contributions:**

57 373 FM conceptualized the study, participated in the design, wrote the study protocol,  
58  
59 374 performed the statistical analysis, did a literature search and drafted the manuscript. BB  
60

375 participated in study design, did a literature search and drafted the manuscript. HA, and NA  
 376 did a literature search, and revision of the draft. All authors read and approved the final draft.

377

378 **Tables and Figures:**

379 **Table 1.**

**Table 1. Socio-demographic characteristics: (n=3586)**

|                          |                   |            |                        |                       |                    |
|--------------------------|-------------------|------------|------------------------|-----------------------|--------------------|
| <b>Gender (%)</b>        | Male              | 1142(31.8) | <b>Education (%)</b>   | Primary School        | 25(0.7)            |
|                          | Female            | 2444(68.2) |                        | Intermediate School   | 166(4.6)           |
| <b>Age (%)</b>           | <16               | 59(1.6)    |                        | Secondary school      | 375(10.4)          |
|                          | 16-30             | 2789(77.8) |                        | College/University    | 2839(79.2)         |
|                          | 31-45             | 503(14.0)  |                        | Master's degree       | 157(4.4)           |
|                          | >45               | 235(6.6)   |                        | PhD                   | 24(0.7)            |
| <b>Social Status (%)</b> | Single            | 2279(63.5) |                        | <b>Occupation (%)</b> | Health care worker |
|                          | In a relationship | 286(8.0)   | Government institution |                       | 283(7.9)           |
|                          | Married           | 943(26.3)  | Private institution    |                       | 182(5.1)           |
|                          | Divorced          | 46(1.3)    | Business               |                       | 198(5.5)           |
|                          | Widowed           | 32(0.9)    | Military               |                       | 32(0.9)            |
| <b>Economic</b>          | <sup>1</sup> Poor | 247(6.9)   | Unemployed             |                       | 1822(50.8)         |
|                          |                   |            | Other                  |                       | 435(12.1)          |

|                   |                        |            |                              |     |            |
|-------------------|------------------------|------------|------------------------------|-----|------------|
| <b>Status (%)</b> | <sup>2</sup> Moderate  | 1247(34.8) | <b>Household members (%)</b> | 0   | 46(1.3)    |
|                   | <sup>3</sup> Good      | 1761(49.1) |                              | 1-5 | 2751(76.7) |
|                   | <sup>4</sup> Excellent | 331(9.2)   |                              | >5  | 789(22)    |

380 <sup>1</sup>Poor: income does not provide essential needs for the family. <sup>2</sup>Moderate: income provides essential  
 381 needs for the family but no more. <sup>3</sup>Good: income provides essential needs and some luxury  
 382 requirements. <sup>4</sup>Excellent: income provides luxury requirements.

383

384 **Table 2.**385 **Table 2. Mean knowledge score of participants by section**

|                          | <b>Mean Knowledge Score (%)</b> | <b>± Standard Deviation (%)</b> |
|--------------------------|---------------------------------|---------------------------------|
| General Knowledge        | 67.0                            | 18.9                            |
| Transmission Pathways    | 70.7                            | 16.9                            |
| Signs and Symptoms       | 76.0                            | 13.6                            |
| Prevention Methods       | 88.8                            | 10.2                            |
| <b>Overall knowledge</b> | 75.6                            | 9.4                             |

386

387 **Table 3.**388 **Table 3. General Knowledge around COVID-19: (n= 3586)**

|                        | Virus      | Bacteria | Parasite | Immune deficiency | Fungus | Inherited | Do Not Know |
|------------------------|------------|----------|----------|-------------------|--------|-----------|-------------|
| <b>Causative Agent</b> | 3383(94.3) | 39(1.1)  | 8(0.2)   | 46(1.3)           | 0(0.0) | 2(0.1)    | 108(3.0)    |

|                                                                                                                       |                       |                     |                   |                       |             |  |
|-----------------------------------------------------------------------------------------------------------------------|-----------------------|---------------------|-------------------|-----------------------|-------------|--|
| N(%)                                                                                                                  |                       |                     |                   |                       |             |  |
|                                                                                                                       | 1 Minute to<br>1 Hour | 1 Hour to<br>2 Days | 2 Days to 2 Weeks | 2 Weeks to 1<br>Month | >1<br>Month |  |
| <b>Incubation period</b>                                                                                              | 18(0.5)               | 58(1.6)             | 2535(70.7)        | 958(26.7)             | 17(0.5)     |  |
| N(%)                                                                                                                  |                       |                     |                   |                       |             |  |
|                                                                                                                       |                       | <b>Yes(%)</b>       | <b>No(%)</b>      | <b>Do Not Know(%)</b> |             |  |
| <b>Can infection with COVID-19 confer permanent immunity?</b>                                                         |                       | 815(22.7)           | 1500(41.8)        | 1271(35.5)            |             |  |
| <b>Can COVID-19 cause severe illness and lead to death in elderly, chronically ill, and immunodeficient patients?</b> |                       | 3489(97.3)          | 28(0.8)           | 69(1.9)               |             |  |
| <b>Can COVID-19 cause infertility?</b>                                                                                |                       | 461(12.9)           | 1222(34.1)        | 1903(53.0)            |             |  |
| <b>Is COVID-19 teratogenic (i.e. cause malformations/abnormalities to an embryo/fetus)?</b>                           |                       | 157(4.4)            | 1433(40.0)        | 1996(55.6)            |             |  |
| <b>Treatment</b>                                                                                                      |                       |                     |                   |                       |             |  |
|                                                                                                                       |                       | <b>Yes(%)</b>       | <b>No(%)</b>      | <b>Do Not Know(%)</b> |             |  |
| <b>No treatment</b>                                                                                                   |                       | 2597(72.4)          | 515(14.4)         | 474(13.2)             |             |  |

|                    |            |            |           |
|--------------------|------------|------------|-----------|
| <b>available</b>   |            |            |           |
| <b>Antibiotics</b> | 1228(34.3) | 1790(49.9) | 568(15.8) |
| <b>Ibuprofen</b>   | 1268(35.3) | 1921(53.6) | 397(11.1) |
| <b>Vaccine</b>     | 103(2.9)   | 2986(83.3) | 497(13.8) |

387

388 **Table 4.****Table 4. Transmission, Signs, and Symptoms of COVID-19: (n=3586)**

|                                                          | <b>YES(%)</b> | <b>NO(%)</b> | <b>DO NOT<br/>KNOW(%)</b> |
|----------------------------------------------------------|---------------|--------------|---------------------------|
| <b>Transmission Pathways</b>                             |               |              |                           |
| <b>Respiratory droplets (from coughing or sneezing)</b>  | 3521(98.2)    | 21(0.6)      | 44(1.2)                   |
| <b>Handshaking</b>                                       | 3330(92.9)    | 189(5.3)     | 67(1.8)                   |
| <b>Touching an infected person's personal belongings</b> | 3387(94.4)    | 131(3.7)     | 68(1.9)                   |
| <b>Animals-to-human</b>                                  | 910(25.4)     | 1973(55.0)   | 703(19.6)                 |
| <b>Undercooked food</b>                                  | 1301(36.3)    | 1734(48.3)   | 551(15.4)                 |
| <b>Sexual contact</b>                                    | 1210(33.7)    | 1477(41.2)   | 899(25.1)                 |
| <b>Horizontal transmission</b>                           | 1130(31.5)    | 1160(32.4)   | 1296(36.1)                |
| <b>Signs and Symptoms</b>                                |               |              |                           |
| <b>Fever</b>                                             | 3563(99.4)    | 9(0.2)       | 14(0.4)                   |
| <b>Sneezing</b>                                          | 2353(65.6)    | 1000(27.9)   | 233(6.5)                  |

|                                      |            |            |           |
|--------------------------------------|------------|------------|-----------|
| <b>Sore throat</b>                   | 3037(84.7) | 358(10.0)  | 191(5.3)  |
| <b>Headache</b>                      | 3186(88.8) | 190(5.3)   | 210(5.9)  |
| <b>Chest pain</b>                    | 3050(85.0) | 254(7.1)   | 282(7.9)  |
| <b>Body aches (generalized pain)</b> | 3019(84.2) | 260(7.2)   | 307(8.6)  |
| <b>Fatigue</b>                       | 3405(95.0) | 72(2.0)    | 109(3.0)  |
| <b>Diarrhea</b>                      | 1972(55.0) | 971(27.1)  | 643(17.9) |
| <b>Dry cough</b>                     | 3466(96.7) | 44(1.2)    | 76(2.1)   |
| <b>Productive cough</b>              | 458(12.8)  | 2586(72.1) | 542(15.1) |
| <b>Bleeding</b>                      | 130(3.6)   | 2613(72.9) | 843(23.5) |
| <b>Asymptomatic</b>                  | 2221(61.9) | 375(10.5)  | 990(27.6) |

389

390 **Table 5.****Table 5. Prevention Methods: (n= 3586)**

|                                                                                  | <b>YES(%)</b> | <b>NO(%)</b> | <b>DO NOT<br/>KNOW(%)</b> |
|----------------------------------------------------------------------------------|---------------|--------------|---------------------------|
| <b>Does wearing a face mask outside the home offer protection from Covid-19?</b> | 3204(89.3)    | 314(8.8)     | 68(1.9)                   |
| <b>Does washing hands with soap and water offer protection from Covid-19?</b>    | 3574(99.7)    | 5(0.1)       | 7(0.2)                    |



|                                                                                                  |            |            |           |
|--------------------------------------------------------------------------------------------------|------------|------------|-----------|
| <b>Does avoiding crowded places offer protection from Covid-19?</b>                              | 3574(99.7) | 4(0.1)     | 8(0.2)    |
| <b>Does the flu vaccine offer protection from Covid-19?</b>                                      | 331(9.2)   | 2482(69.2) | 773(21.6) |
| <b>Does staying at home offer protection from Covid-19?</b>                                      | 3554(99.1) | 15(0.4)    | 17(0.5)   |
| <b>Does using hand sanitizer offer protection from Covid-19?</b>                                 | 3430(95.6) | 104(2.9)   | 52(1.5)   |
| <b>Does cleaning house items with bleach offer protection from Covid-19?</b>                     | 3408(95.0) | 110(3.1)   | 68(1.9)   |
| <b>Does cleaning fruits and vegetables with soap and water offer protection from Covid-19?</b>   | 3262(90.9) | 221(6.2)   | 103(2.9)  |
| <b>Does cleaning surfaces with a mixture of Flash and bleach offer protection from Covid-19?</b> | 158(4.4)   | 3301(92.1) | 127(3.5)  |
| <b>Does the quarantine of symptomatic individuals protect others from Covid-19?</b>              | 3305(92.2) | 241(6.7)   | 40(1.1)   |
| <b>Do cumin, anise, and mint offer protection from Covid-19?</b>                                 | 1041(29.0) | 1934(53.9) | 611(17.1) |

391

392 **Table 6.**

**Table 6. Mean knowledge score of participants by demographic variables (one way ANOVA), (n= 3586)**

| <b>Characteristics</b>   | <b>Number of participants (%)</b> | <b>Knowledge Score (%)</b> | <b>F-test</b> | <b>P-value</b> |        |
|--------------------------|-----------------------------------|----------------------------|---------------|----------------|--------|
| <b>Gender</b>            | Male                              | 1142(31.8)                 | 75.0          | -2.625         | 0.009* |
|                          | Female                            | 2444(68.2)                 | 75.9          |                |        |
| <b>Age-group (years)</b> | <16                               | 59(1.6)                    | 71.5          | 4.770          | 0.003* |
|                          | 16-30                             | 2789(77.8)                 | 75.8          |                |        |
|                          | 31-45                             | 503(14.0)                  | 75.7          |                |        |
|                          | >45                               | 23(6.6)                    | 74.8          |                |        |
| <b>Social status</b>     | Single                            | 2279(63.5)                 | 75.8          | 2.485          | 0.042* |

|                  |                     |            |      |        |        |
|------------------|---------------------|------------|------|--------|--------|
|                  | In a relationship   | 286(8.0)   | 76.6 |        |        |
|                  | Married             | 943(26.3)  | 75.1 |        |        |
|                  | Divorced            | 46(1.3)    | 73.9 |        |        |
|                  | Widowed             | 32(0.9)    | 73.4 |        |        |
| <b>Residence</b> | Urban               | 2426(67.7) | 75.8 | 1.652  | 0.099  |
|                  | Rural               | 1160(32.3) | 75.3 |        |        |
| <b>Education</b> | Primary school      | 25(0.7)    | 66.5 | 26.176 | 0.000* |
|                  | Intermediate school | 166(4.6)   | 73.2 |        |        |
|                  | Secondary school    | 375(10.4)  | 70.0 |        |        |
|                  | College/University  | 2839(79.2) | 76.3 |        |        |
|                  | Master's degree     | 157(4.4)   | 77.2 |        |        |

|                   |                        |            |      |        |        |
|-------------------|------------------------|------------|------|--------|--------|
|                   | PhD                    | 24(0.7)    | 76.6 |        |        |
| <b>Occupation</b> | Health care worker     | 634(17.7)  | 78.6 | 16.379 | 0.000* |
|                   | Government institution | 283(7.9)   | 75.7 |        |        |
|                   | Private institution    | 182(5.1)   | 75.5 |        |        |
|                   | Business               | 198(5.5)   | 73.4 |        |        |
|                   | Military               | 32(0.9)    | 71.2 |        |        |
|                   | Unemployed             | 1822(50.8) | 75.3 |        |        |
|                   | Other                  | 435(12.1)  | 74.0 |        |        |

|                          |           |            |      |        |        |
|--------------------------|-----------|------------|------|--------|--------|
| <b>Economic status</b>   | Excellent | 331(9.2)   | 76.6 | 7.108  | 0.000* |
|                          | Good      | 1761(49.1) | 76.2 |        |        |
|                          | Moderate  | 1247(34.8) | 74.9 |        |        |
|                          | Poor      | 247(6.9)   | 74.3 |        |        |
| <b>Household members</b> | 0         | 46(1.3)    | 74.4 | 15.451 | 0.000* |
|                          | 1-5       | 2751(76.7) | 76.1 |        |        |
|                          | >5        | 789(22.0)  | 74.0 |        |        |

393

394 **Table 7.**

**Table 7.** Multiple linear regression on variables associated with poor COVID-19 knowledge

| Variable                        | Coefficient | Standard error | t      | P      |
|---------------------------------|-------------|----------------|--------|--------|
| <b>Gender (male vs. female)</b> | -0.933      | 0.334          | -2.794 | 0.005* |

|                                                                                                              |        |       |        |        |
|--------------------------------------------------------------------------------------------------------------|--------|-------|--------|--------|
| <b>Education (primary, intermediate, secondary school vs. college/university, master, PhD)</b>               | -3.782 | 0.466 | -8.125 | 0.000* |
| <b>Occupation (government, private sector, business, military, unemployed, other vs. health care worker)</b> | -3.592 | 0.474 | -7.579 | 0.000* |
| <b>Economic status (moderate, poor vs. excellent, good)</b>                                                  | -0.669 | 0.325 | -2.057 | 0.040* |
| <b>Household members(&gt;5 vs. 1-5)</b>                                                                      | -1.737 | 0.374 | -4.648 | 0.000* |

395

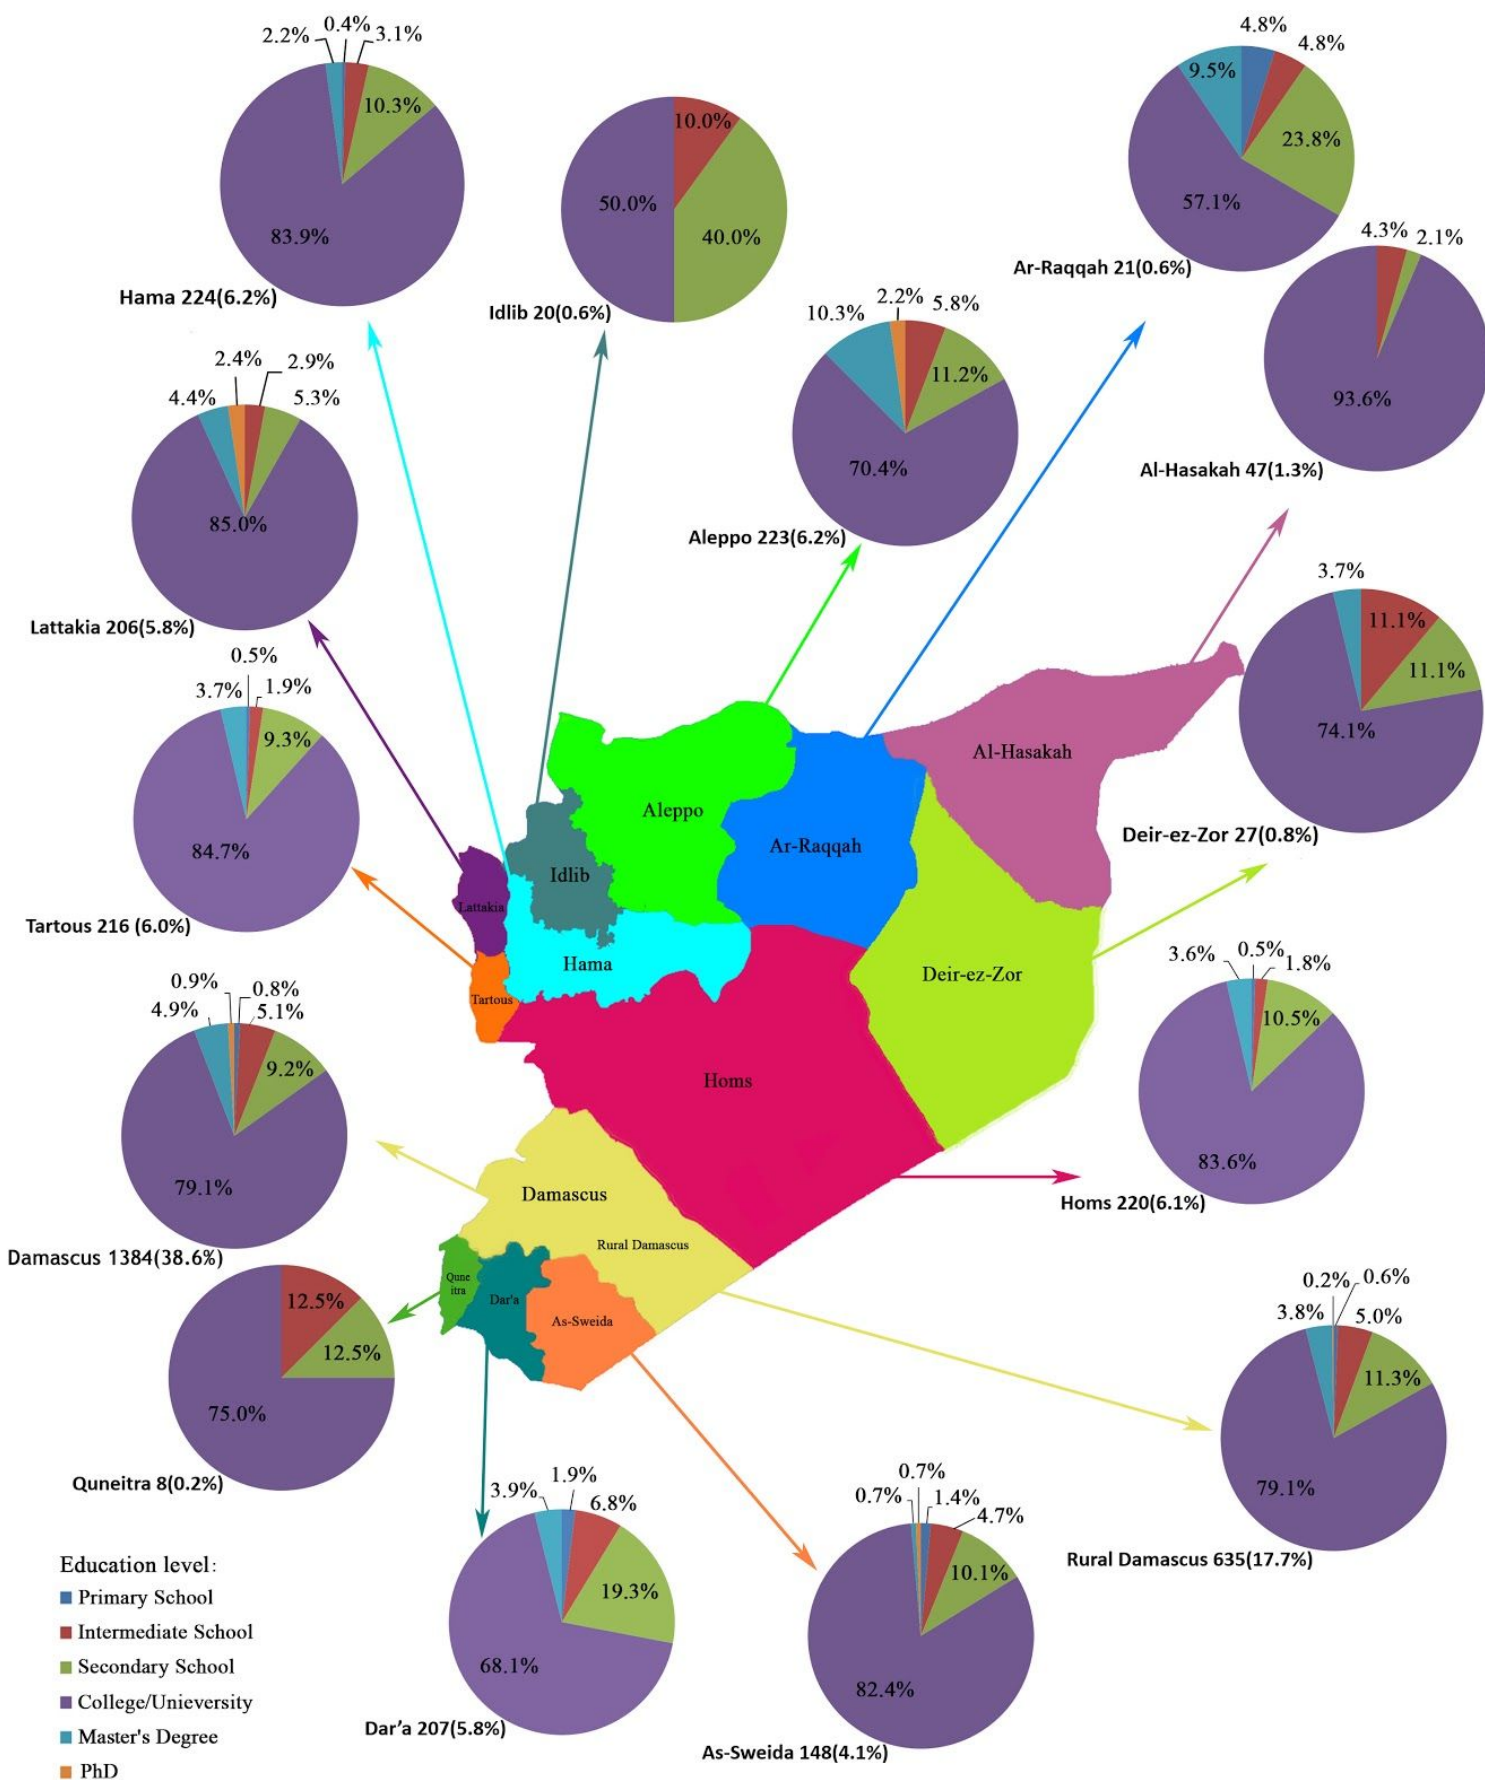

396 **Figure 1.** Distribution of participants according to governorates and education level

397

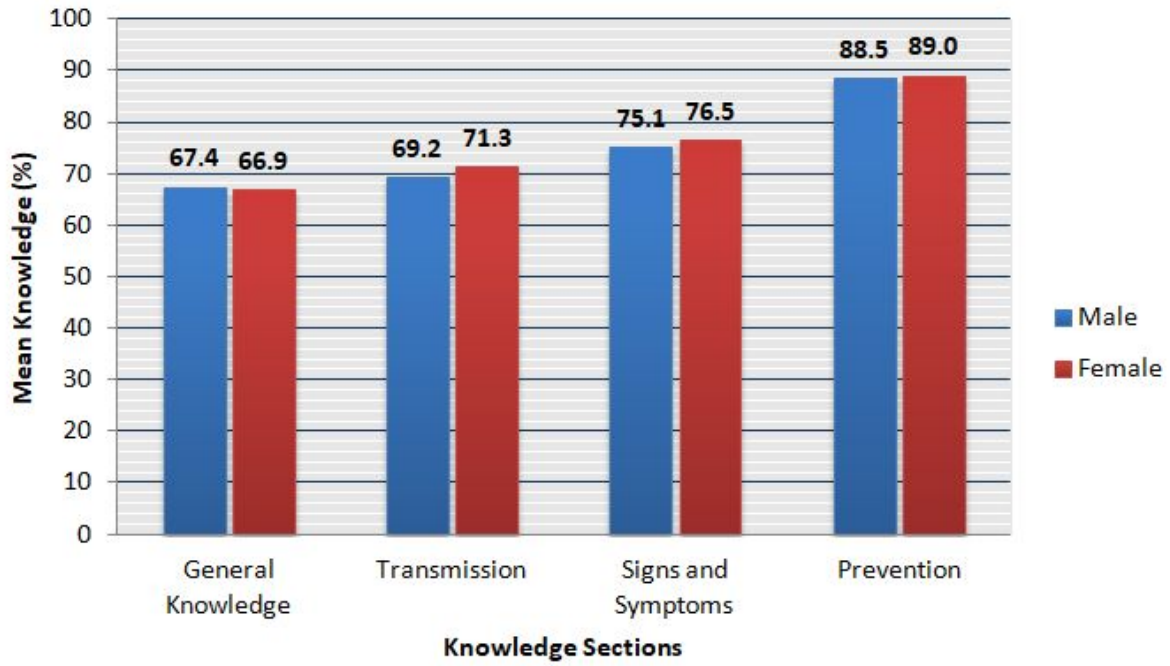

398  
399 **Figure 2.** Relationship between both genders and mean knowledge.  
26  
27  
28 400



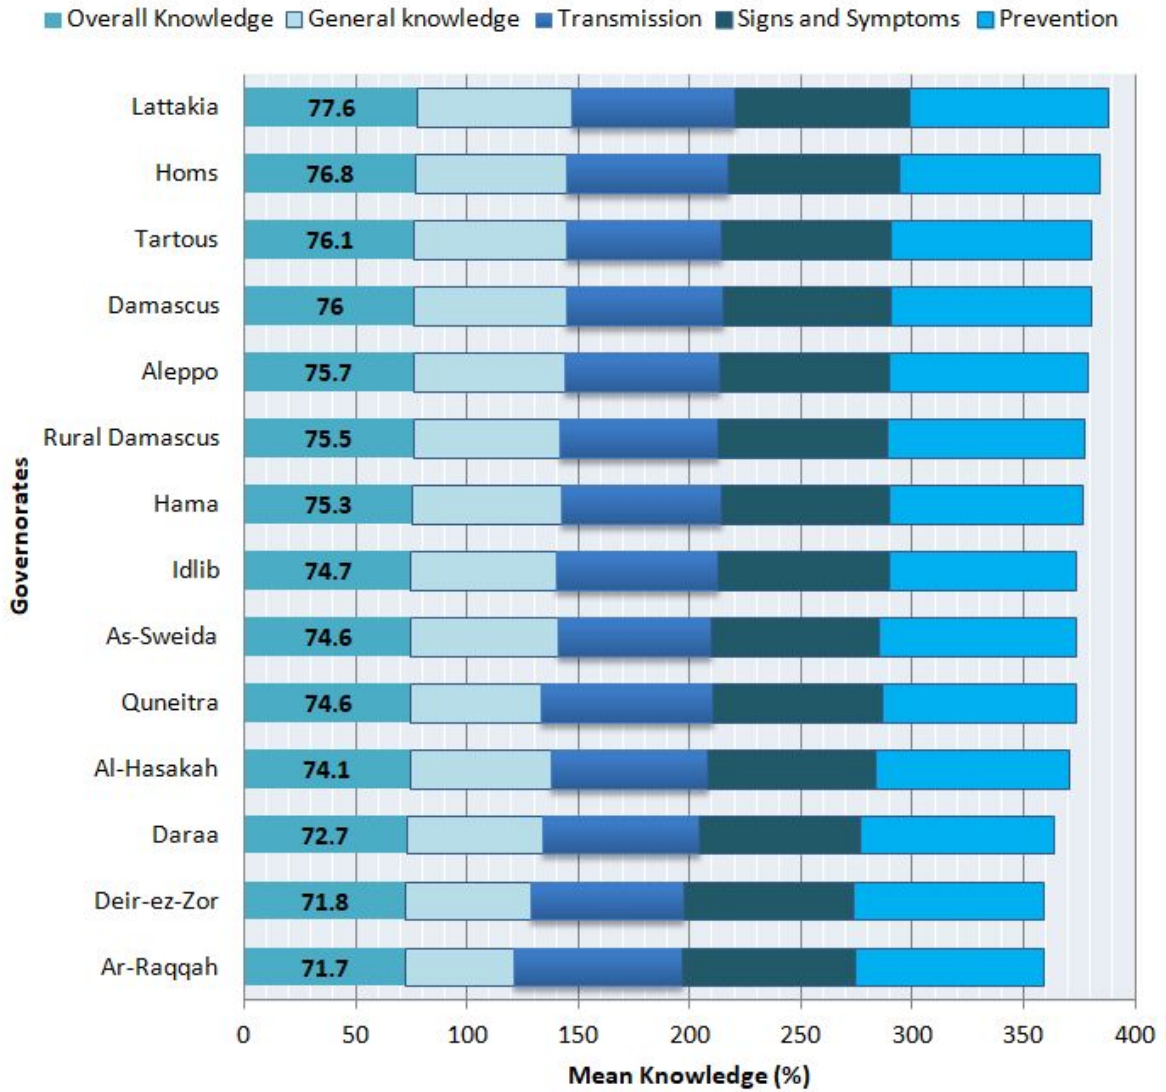

**Figure 3.** Relationship between place of residence and mean knowledge.

only

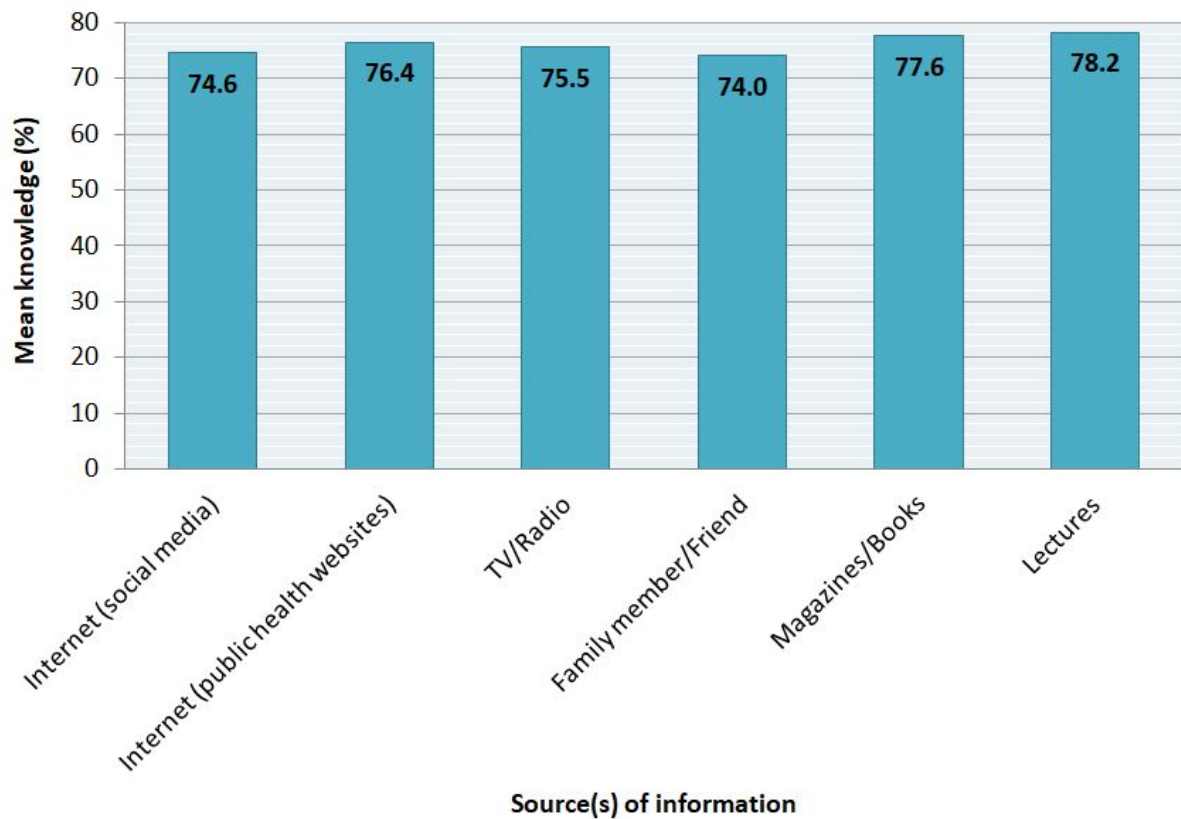

**Figure 4.** Relationship between different sources of information and mean knowledge.

#### Figures and tables legends:

**Table 1.** Sociodemographic characteristics

**Table 2.** Mean knowledge score of participants by section

**Table 3.** General Knowledge around COVID-19

**Table 4.** Transmission, Signs, and Symptoms of COVID-19

**Table 5.** Prevention Methods

**Table 6.** Mean knowledge score of participants by demographic variables

**Table 7.** Multiple linear regression on variables associated with poor COVID-19 knowledge

**Figure 1.** Distribution of participants according to governorates and education level

**Figure 2.** Relationships between both genders and mean knowledge.

**Figure 3.** Relationship between place of residence and mean knowledge.

1  
2  
3 **418 Figure 4.** The relationship between different sources of information and mean knowledge.  
4  
5

6 419

7 **420 References:**

- 8  
9 421 1. Zhong B-L, Luo W, Li H-M, Zhang Q-Q, Liu X-G, Li W-T, et al. Knowledge, attitudes, and  
10 422 practices towards COVID-19 among Chinese residents during the rapid rise period of the COVID-19  
11 423 outbreak: a quick online cross-sectional survey. *International Journal of Biological Sciences*.  
12 424 2020;16(10):1745.  
13  
14 425 2. Khader Y, Al Nsour M, Al-Batayneh OB, Saadeh R, Bashier H, Alfaqih M, et al. Dentists'  
15 426 Awareness, Perception, and Attitude Regarding COVID-19 and Infection Control: Cross-Sectional  
16 427 Study Among Jordanian Dentists. *JMIR Public Health and Surveillance*. 2020;6(2):e18798.  
17 428 3. Naming the coronavirus disease (COVID-19) and the virus that causes it. World Health  
18 429 Organization. 2020.  
19 430 4. Huang C, Wang Y, Li X, Ren L, Zhao J, Hu Y, et al. Clinical features of patients infected with  
20 431 2019 novel coronavirus in Wuhan, China. *The Lancet*. 2020;395(10223):497-506.  
21 432 5. Organization WH. Coronavirus disease 2019 (COVID-19): situation report, 106. 2020.  
22 433 6. Organization WH. Getting your workplace ready for COVID-19: How COVID-19 spreads, 19  
23 434 March 2020. World Health Organization; 2020.  
24 435 7. McKernan B. Syria confirms first Covid-19 case amid fears of catastrophic spread. *The*  
25 436 *Guardian*. 2020.  
26 437 8. Gharibah M, Mehchy Z. COVID-19 pandemic: Syria's response and healthcare capacity. 2020.  
27 438 9. Ajilore K, Atakiti I, Onyenankeya K. College students' knowledge, attitudes and adherence to  
28 439 public service announcements on Ebola in Nigeria: Suggestions for improving future Ebola  
29 440 prevention education programmes. *Health Education Journal*. 2017;76(6):648-60.  
30 441 10. Tachfouti N, Slama K, Berraho M, Nejari C. The impact of knowledge and attitudes on  
31 442 adherence to tuberculosis treatment: a case-control study in a Moroccan region. *Pan African*  
32 443 *Medical Journal*. 2012;12(1).  
33 444 11. McNatt Z, Boothby NG, Al-Shannaq H, Chandler H, Freels P, Mahmoud AS, et al. Impact of  
34 445 Separation on Refugee Families: Syrian Refugees in Jordan. 2018.  
35 446 12. Syria anniversary press release. United Nations Office for the Coordination of Humanitarian  
36 447 Affairs (OCHA). 2020.  
37 448 13. UNICEF Syria Crisis Situation Report 2019.  
38 449 14. Qarawi A, Ng SJ, Gad A, Luu M, Al-Ahdal T, Sharma A, et al. Awareness and Preparedness of  
39 450 Hospital Staff against Novel Coronavirus (COVID-2019): A Global Survey - Study Protocol. *SSRN*  
40 451 *Electronic Journal*. 2020.  
41 452 15. Austrian K, Pinchoff J, Tidwell JB, White C, Abuya T, Kangwana B, et al. COVID-19 related  
42 453 knowledge, attitudes, practices and needs of households in informal settlements in Nairobi, Kenya.  
43 454 2020.  
44 455 16. Roy D, Tripathy S, Kar SK, Sharma N, Verma SK, Kaushal V. Study of knowledge, attitude,  
45 456 anxiety & perceived mental healthcare need in Indian population during COVID-19 pandemic. *Asian*  
46 457 *Journal of Psychiatry*. 2020:102083.  
47 458 17. Hussain T, Khan S, Gilani U, Raza S. Evaluation of General Awareness Among Professionals  
48 459 Regarding COVID-19: A Survey Based Study from Pakistan. 2020.  
49 460 18. Zhou M, Tang F, Wang Y, Nie H, Zhang L, You G, et al. Knowledge, attitude and practice  
50 461 regarding COVID-19 among health care workers in Henan, China. *Journal of Hospital Infection*. 2020.  
51 462 19. Bhagavathula AS, Aldhaleei WA, Rahmani J, Mahabadi MA, Bandari DK. Novel Coronavirus  
52 463 (COVID-19) Knowledge and Perceptions: A Survey on Healthcare workers. *medRxiv*. 2020.  
53 464 20. Organization WH. Coronavirus disease 2019 (COVID-19): situation report, 71. 2020.  
54  
55  
56  
57  
58  
59  
60

- 1  
2  
3 465 21. Backer J, Klinkenberg D, Wallinga J. Incubation period of 2019 novel coronavirus (2019-  
4 466 nCoV) infections among travellers from Wuhan, China, 20–28 January 2020. *Eurosurveillance*.  
5 467 2020;25.  
6 468 22. Plecher H. Age structure in Syria 2018. *Statista*. 2020.  
7 469 23. Vadivu TS, Annamuthu P. An Awareness and Perception of COVID-19 among General Public–  
8 470 A Cross Sectional Analysis. 2014.  
9 471 24. Organization WH. Web World Health Organization–Diabetes country profiles. *Diakses*; 2016.  
10 472 25. Tailakh A, Evangelista LS, Menten JC, Pike NA, Phillips LR, Morisky DE. Hypertension  
11 473 prevalence, awareness, and control in Arab countries: A systematic review. *Nursing & health*  
12 474 *sciences*. 2014;16(1):126-30.  
13 475 26. The use of non-steroidal anti-inflammatory drugs (NSAIDs) in patients with COVID-19. *World*  
14 476 *Health Organization*. 2020.  
15 477 27. Practical considerations and recommendations for religious leaders and faith-based  
16 478 communities in the context of COVID-19. *World Health Organization*. 2020.  
17 479 28. Safe Ramadan practices in the context of the COVID-19 *World Health Organization*. 2020.  
18 480 29. Surveillances V. The epidemiological characteristics of an outbreak of 2019 novel  
19 481 coronavirus diseases (COVID-19)—China, 2020. *China CDC Weekly*. 2020;2(8):113-22.  
20 482 30. Best M, Neuhauser D. Ignaz Semmelweis and the birth of infection control. *Quality & safety*  
21 483 *in health care*. 2004;13:233-4.  
22 484 31. Rabie T, Curtis V. Handwashing and Risk of Respiratory Infections: A Quantitative Systematic  
23 485 Review. *Tropical medicine & international health : TM & IH*. 2006;11:258-67.  
24 486 32. Jefferson T, Foxlee R, Del Mar C, Dooley L, Ferroni E, Hewak B, et al. Physical interventions to  
25 487 interrupt or reduce the spread of respiratory viruses: systematic review. *Bmj*. 2008;336(7635):77-80.  
26  
27  
28  
29  
30 488

1 **Attached Survey:**2 **Appendix 1**

| <b>Socio-demographic Characteristics</b>                                                                                                                                                                                                                                                                    |                                                                                                                                                                                                                                                                                                                                                                                                                                                                                               |
|-------------------------------------------------------------------------------------------------------------------------------------------------------------------------------------------------------------------------------------------------------------------------------------------------------------|-----------------------------------------------------------------------------------------------------------------------------------------------------------------------------------------------------------------------------------------------------------------------------------------------------------------------------------------------------------------------------------------------------------------------------------------------------------------------------------------------|
| <b>Age (years):</b><br><input type="checkbox"/> Below 15 <input type="checkbox"/> 15-20 <input type="checkbox"/> 20-30 <input type="checkbox"/> 30-50<br><input type="checkbox"/> 40-50 <input type="checkbox"/> 50-60 <input type="checkbox"/> 60-70 <input type="checkbox"/> Above 70                     | <b>Gender:</b><br><input type="checkbox"/> Male<br><input type="checkbox"/> Female                                                                                                                                                                                                                                                                                                                                                                                                            |
| <b>Marital status:</b><br><input type="checkbox"/> Single <input type="checkbox"/> Relationship <input type="checkbox"/> Married<br><input type="checkbox"/> Divorced <input type="checkbox"/> Widowed                                                                                                      | <b>Educational level:</b><br><input type="checkbox"/> Primary school <input type="checkbox"/> Intermediate school<br><input type="checkbox"/> Secondary school <input type="checkbox"/> University/College<br><input type="checkbox"/> Master's Degree <input type="checkbox"/> PHD Degree                                                                                                                                                                                                    |
| <b>Occupation:</b><br><input type="checkbox"/> Health care worker <input type="checkbox"/> Government institution<br><input type="checkbox"/> Private institution <input type="checkbox"/> Business<br><input type="checkbox"/> Military <input type="checkbox"/> Unemployed <input type="checkbox"/> Other | <b>Residence:</b><br><input type="checkbox"/> Damascus/Rural Damascus <input type="checkbox"/> Hama<br><input type="checkbox"/> Aleppo <input type="checkbox"/> Homs <input type="checkbox"/> Tartous <input type="checkbox"/> Lattakia<br><input type="checkbox"/> Dara'a <input type="checkbox"/> As-Sweida <input type="checkbox"/> Al Hasakah<br><input type="checkbox"/> Deir-ez-Zor <input type="checkbox"/> Idlib <input type="checkbox"/> Ar-Raqqah <input type="checkbox"/> Quneitra |
| <b>Area:</b><br><input type="checkbox"/> Rural <input type="checkbox"/> Urban                                                                                                                                                                                                                               | <b>Economic Status:</b><br><input type="checkbox"/> Excellent <input type="checkbox"/> Good <input type="checkbox"/> Moderate <input type="checkbox"/> Poor                                                                                                                                                                                                                                                                                                                                   |
| <b>Do you smoke?</b><br><input type="checkbox"/> Yes <input type="checkbox"/> No                                                                                                                                                                                                                            | <b>Do you drink alcohol?</b><br><input type="checkbox"/> Yes <input type="checkbox"/> No                                                                                                                                                                                                                                                                                                                                                                                                      |
| <b>How many people do you live with?</b><br><input type="checkbox"/> Alone <input type="checkbox"/> 1-5 <input type="checkbox"/> 6-10 <input type="checkbox"/> 11-15 <input type="checkbox"/> 16-20 <input type="checkbox"/> Above 20                                                                       |                                                                                                                                                                                                                                                                                                                                                                                                                                                                                               |
| <b>Do you share toiletries/personal care products with others?</b><br><input type="checkbox"/> Yes <input type="checkbox"/> No                                                                                                                                                                              |                                                                                                                                                                                                                                                                                                                                                                                                                                                                                               |
| <b>Do you know anyone infected with COVID-19?</b><br><input type="checkbox"/> Yes <input type="checkbox"/> No                                                                                                                                                                                               |                                                                                                                                                                                                                                                                                                                                                                                                                                                                                               |

**Table 2. General Knowledge about COVID-19**

|                                                                                                                                                                   |                                                                                                                                                                                                      |
|-------------------------------------------------------------------------------------------------------------------------------------------------------------------|------------------------------------------------------------------------------------------------------------------------------------------------------------------------------------------------------|
| <b>What is COVID-19?</b><br><input type="checkbox"/> Virus <input type="checkbox"/> Bacteria<br><input type="checkbox"/> Parasite <input type="checkbox"/> Fungus | <b>Do you know how long after being infected with COVID-19 can a person suffer from signs and symptoms?</b><br><input type="checkbox"/> 1 Minute to 1 Hour <input type="checkbox"/> 1 Hour to 2 Days |
|-------------------------------------------------------------------------------------------------------------------------------------------------------------------|------------------------------------------------------------------------------------------------------------------------------------------------------------------------------------------------------|

|                                                                                                                                                                                                                                                                                                 |                                    |                                                                                       |                                            |
|-------------------------------------------------------------------------------------------------------------------------------------------------------------------------------------------------------------------------------------------------------------------------------------------------|------------------------------------|---------------------------------------------------------------------------------------|--------------------------------------------|
| <input type="checkbox"/> Immunodeficiency<br><input type="checkbox"/> Do not know                                                                                                                                                                                                               | <input type="checkbox"/> Inherited | <input type="checkbox"/> 2 Days to 2 weeks<br><input type="checkbox"/> Over a 1 month | <input type="checkbox"/> 2 Weeks to 1Month |
| <p><b>Can an infection with COVID-19 confer permanent immunity (once infected with COVID-19 you cannot contract another infection)?</b></p> <p><input type="checkbox"/> Yes    <input type="checkbox"/> No    <input type="checkbox"/> Do not know</p>                                          |                                    |                                                                                       |                                            |
| <p><b>Can COVID-19 cause severe illness and lead to death in elderly, chronically ill (hypertension, diabetes, asthma . . .), and those who have compromised immune systems?</b></p> <p><input type="checkbox"/> Yes    <input type="checkbox"/> No    <input type="checkbox"/> Do not know</p> |                                    |                                                                                       |                                            |
| <p><b>Can COVID-19 cause infertility?</b></p> <p><input type="checkbox"/> Yes    <input type="checkbox"/> No    <input type="checkbox"/> Do not know</p>                                                                                                                                        |                                    |                                                                                       |                                            |
| <p><b>Is COVID-19 teratogenic (i.e. cause malformations/abnormalities to an embryo/fetus)?</b></p> <p><input type="checkbox"/> Yes    <input type="checkbox"/> No    <input type="checkbox"/> Do not know</p>                                                                                   |                                    |                                                                                       |                                            |
| <b>Treatment for COVID-19</b>                                                                                                                                                                                                                                                                   |                                    |                                                                                       |                                            |
|                                                                                                                                                                                                                                                                                                 | <b>Yes</b>                         | <b>No</b>                                                                             | <b>Do Not Know</b>                         |
| <b>No treatment available</b>                                                                                                                                                                                                                                                                   |                                    |                                                                                       |                                            |
| <b>Antibiotics</b>                                                                                                                                                                                                                                                                              |                                    |                                                                                       |                                            |
| <b>Ibuprofen</b>                                                                                                                                                                                                                                                                                |                                    |                                                                                       |                                            |
| <p><b>Is there an available vaccine for COVID-19?</b></p> <p><input type="checkbox"/> Yes    <input type="checkbox"/> No    <input type="checkbox"/> Do not know</p>                                                                                                                            |                                    |                                                                                       |                                            |

| <b>Table 3. Transmission Pathways</b>                                                                       |            |           |                    |
|-------------------------------------------------------------------------------------------------------------|------------|-----------|--------------------|
|                                                                                                             | <b>Yes</b> | <b>No</b> | <b>Do Not Know</b> |
| <b>Can COVID-19 be transmitted via respiratory droplets (coughing or sneezing) of infected individuals?</b> |            |           |                    |
| <b>Can COVID-19 be transmitted after shaking-hands with an infected individual?</b>                         |            |           |                    |
| <b>Can COVID-19 be transmitted after touching an infected individual's personal belongings?</b>             |            |           |                    |
| <b>Can COVID-19 be transmitted from animals to humans?</b>                                                  |            |           |                    |
| <b>Can COVID-19 be transmitted via undercooked food?</b>                                                    |            |           |                    |

|                                                                          |  |  |  |
|--------------------------------------------------------------------------|--|--|--|
| Can COVID-19 be transmitted via sexual contact?                          |  |  |  |
| Can COVID-19 be transmitted via vertical transmission (mother to fetus)? |  |  |  |

**Table 4. Signs and Symptoms of COVID-19**

|                                                                            | True | False | Do Not Know |
|----------------------------------------------------------------------------|------|-------|-------------|
| Is fever/temperature among the signs and symptoms of COVID-19?             |      |       |             |
| Is sneezing among the signs and symptoms of COVID-19?                      |      |       |             |
| Is sore throat among the signs and symptoms of COVID-19?                   |      |       |             |
| Is headache among the signs and symptoms of COVID-19?                      |      |       |             |
| Is Chest pain among the signs and symptoms of COVID-19?                    |      |       |             |
| Is body aches (generalized pain) among the signs and symptoms of COVID-19? |      |       |             |
| Is fatigue among the signs and symptoms of COVID-19?                       |      |       |             |
| Is diarrhea among the signs and symptoms of COVID-19?                      |      |       |             |
| Is a runny nose among the signs and symptoms of COVID-19?                  |      |       |             |
| Is dry cough among the signs and symptoms of COVID-19?                     |      |       |             |
| Is productive cough among the signs and symptoms of COVID-19?              |      |       |             |
| Is bleeding among the signs and symptoms of COVID-19?                      |      |       |             |
| Can a person be infected with COVID-19 and have no signs and symptoms?     |      |       |             |

**Table 5. Prevention Methods**

|                                                                           | True | False | Do Not Know |
|---------------------------------------------------------------------------|------|-------|-------------|
| Does wearing a face mask outside the home offer protection from Covid-19? |      |       |             |



|    |                                                                                                                 |  |  |
|----|-----------------------------------------------------------------------------------------------------------------|--|--|
| 1  |                                                                                                                 |  |  |
| 2  |                                                                                                                 |  |  |
| 3  |                                                                                                                 |  |  |
| 4  | <b>Does washing hands with soap and water offer protection from COVID-19?</b>                                   |  |  |
| 5  |                                                                                                                 |  |  |
| 6  |                                                                                                                 |  |  |
| 7  | <b>Do avoiding crowded places offer protection from Covid-19?</b>                                               |  |  |
| 8  |                                                                                                                 |  |  |
| 9  |                                                                                                                 |  |  |
| 10 | <b>Does the flu vaccine offer protection from Covid-19?</b>                                                     |  |  |
| 11 |                                                                                                                 |  |  |
| 12 |                                                                                                                 |  |  |
| 13 | <b>Does staying at home offer protection from Covid-19?</b>                                                     |  |  |
| 14 |                                                                                                                 |  |  |
| 15 |                                                                                                                 |  |  |
| 16 | <b>Does using hand sanitizer offer protection from Covid-19?</b>                                                |  |  |
| 17 |                                                                                                                 |  |  |
| 18 | <b>Does using bleach to clean household surfaces prevent COVID-19 infection?</b>                                |  |  |
| 19 |                                                                                                                 |  |  |
| 20 |                                                                                                                 |  |  |
| 21 | <b>Does cleaning surfaces with a mixture of Flash and bleach offer protection from Covid-19?</b>                |  |  |
| 22 |                                                                                                                 |  |  |
| 23 |                                                                                                                 |  |  |
| 24 | <b>Does the quarantine of symptomatic individuals protect others from Covid-19?</b>                             |  |  |
| 25 |                                                                                                                 |  |  |
| 26 |                                                                                                                 |  |  |
| 27 | <b>Do cumin, anise, and mint offer protection from Covid-19?</b>                                                |  |  |
| 28 |                                                                                                                 |  |  |
| 29 |                                                                                                                 |  |  |
| 30 |                                                                                                                 |  |  |
| 31 |                                                                                                                 |  |  |
| 32 | <b>What is your main source of information about COVID-19? (You may choose more than one option)</b>            |  |  |
| 33 | <input type="checkbox"/> Internet (social media platforms)                                                      |  |  |
| 34 | <input type="checkbox"/> Internet (Official websites like world health organization)                            |  |  |
| 35 | <input type="checkbox"/> TV/Radio                                                                               |  |  |
| 36 | <input type="checkbox"/> Friends/Member of family                                                               |  |  |
| 37 | <input type="checkbox"/> Magazines/Books                                                                        |  |  |
| 38 | <input type="checkbox"/> Lectures                                                                               |  |  |
| 39 |                                                                                                                 |  |  |
| 40 |                                                                                                                 |  |  |
| 41 |                                                                                                                 |  |  |
| 42 |                                                                                                                 |  |  |
| 43 |                                                                                                                 |  |  |
| 44 | <b>If you had new information about COVID-19 would you share it with friends and family to raise awareness?</b> |  |  |
| 45 |                                                                                                                 |  |  |
| 46 | <input type="checkbox"/> Yes <input type="checkbox"/> No                                                        |  |  |
| 47 |                                                                                                                 |  |  |

12



# BMJ Open

## A Crisis Within a Crisis: COVID-19 Knowledge and Awareness among the Syrian Population - a cross-sectional study

|                                 |                                                                                                                                                                                                                                                                                                   |
|---------------------------------|---------------------------------------------------------------------------------------------------------------------------------------------------------------------------------------------------------------------------------------------------------------------------------------------------|
| Journal:                        | <i>BMJ Open</i>                                                                                                                                                                                                                                                                                   |
| Manuscript ID                   | bmjopen-2020-043305.R1                                                                                                                                                                                                                                                                            |
| Article Type:                   | Original research                                                                                                                                                                                                                                                                                 |
| Date Submitted by the Author:   | 06-Jan-2021                                                                                                                                                                                                                                                                                       |
| Complete List of Authors:       | Mohsen, Fatema; Syrian Private University Faculty of Medicine, Bakkar, Batoul; Syrian Private University Faculty of Medicine Armashi, Humam; Syrian Private University Faculty of Medicine Aldaher, Nizar; Syrian Private University Faculty of Medicine; Damascus University Faculty of Medicine |
| <b>Primary Subject Heading</b>: | Public health                                                                                                                                                                                                                                                                                     |
| Secondary Subject Heading:      | Public health, Infectious diseases                                                                                                                                                                                                                                                                |
| Keywords:                       | Public health < INFECTIOUS DISEASES, PUBLIC HEALTH, COVID-19                                                                                                                                                                                                                                      |
|                                 |                                                                                                                                                                                                                                                                                                   |

SCHOLARONE™  
Manuscripts



I, the Submitting Author has the right to grant and does grant on behalf of all authors of the Work (as defined in the below author licence), an exclusive licence and/or a non-exclusive licence for contributions from authors who are: i) UK Crown employees; ii) where BMJ has agreed a CC-BY licence shall apply, and/or iii) in accordance with the terms applicable for US Federal Government officers or employees acting as part of their official duties; on a worldwide, perpetual, irrevocable, royalty-free basis to BMJ Publishing Group Ltd ("BMJ") its licensees and where the relevant Journal is co-owned by BMJ to the co-owners of the Journal, to publish the Work in this journal and any other BMJ products and to exploit all rights, as set out in our [licence](#).

The Submitting Author accepts and understands that any supply made under these terms is made by BMJ to the Submitting Author unless you are acting as an employee on behalf of your employer or a postgraduate student of an affiliated institution which is paying any applicable article publishing charge ("APC") for Open Access articles. Where the Submitting Author wishes to make the Work available on an Open Access basis (and intends to pay the relevant APC), the terms of reuse of such Open Access shall be governed by a Creative Commons licence – details of these licences and which [Creative Commons](#) licence will apply to this Work are set out in our licence referred to above.

Other than as permitted in any relevant BMJ Author's Self Archiving Policies, I confirm this Work has not been accepted for publication elsewhere, is not being considered for publication elsewhere and does not duplicate material already published. I confirm all authors consent to publication of this Work and authorise the granting of this licence.

1  
2  
3  
4 1 **A Crisis Within a Crisis: COVID-19 Knowledge and Awareness among the**  
5  
6 2 **Syrian Population - a cross-sectional study**  
7  
8  
9

10 3  
11  
12 4 **Authors: Fatema Mohsen<sup>1</sup>, Batoul Bakkar<sup>1</sup>, Humam Armashi<sup>1</sup>, Nizar Daher<sup>2,3</sup>**  
13  
14 5  
15  
16

17 6 **Affiliations:**

18  
19  
20  
21 7 1Faculty of Medicine, Syrian Private University, Damascus, Syria.

22  
23 8 2Professor in Infectious Diseases, Department of Internal Medicine, Faculty of Medicine,  
24  
25  
26 9 Damascus University, Damascus, Syria.

27  
28 10 3Professor in Infectious Diseases, Department of Internal Medicine, Faculty of Medicine,  
29  
30  
31 11 Syrian Private University, Rif Dimashq, Syria.  
32

33 12  
34  
35  
36 13 **Corresponding Author:**

37  
38 14 Fatema Mohsen

39  
40  
41  
42 15 Faculty of Medicine, Syrian Private University, Mazzeh Street, P.O. Box 36822, Damascus,

43  
44 16 Syrian Arab republic

45  
46  
47 17 Tel:00963936396590 Email: fatemamohsena@gmail.com  
48  
49

50  
51 18  
52  
53  
54 19 **Abstract:**  
55  
56  
57  
58  
59  
60

1  
2  
3 20 **Objectives:** To gauge specific knowledge around clinical features, transmission pathways, and  
4  
5 21 prevention methods, and to identify factors associated with poor knowledge to help facilitate  
6  
7 22 outbreak management in Syria during this rapid global rise of the COVID-19 pandemic.  
8  
9

10 23 **Design:** Web-based cross-sectional survey.  
11  
12

13 24 **Setting:** This study was conducted in March 2020, nearly 10 years into the Syrian war crisis.  
14  
15 25 The Arabic-language survey was posted on various social media platforms including  
16  
17 26 WhatsApp, Telegram, Instagram, and Facebook targeting various social groups.  
18  
19

20  
21 27 **Participants:** Of 4495 total participants who completed the survey, participants with no known  
22  
23 28 history of Covid-19 infection, residing outside Syria, and who did not fully complete the survey  
24  
25 29 were excluded. The final sample of 3586 participants (completion rate=79.8%) consisted of  
26  
27 30 2444(68.2%) females and 1142(31.8%) males.  
28  
29

30 31 **Primary and secondary outcome measures:** The First, knowledge of COVID-19 in 4 areas  
31  
32 32 (1. General knowledge 2. Transmission pathways 3. Signs and symptoms 4. Prevention  
33  
34 33 methods). The second, factors associated with poor knowledge.  
35  
36  
37

38 34 **Results:** Of the 3586 participants, 2444(68.2%) were female, 1822(50.8%) were unemployed,  
39  
40 35 and 2839(79.2%) were college-educated. The study revealed good awareness regarding  
41  
42 36 COVID-19 (mean 75.6%, SD±9.4%). Multiple linear regression analysis correlated knowledge  
43  
44 37 scores with female gender ( $\beta=-0.933$ ,  $p=0.005$ ), education level ( $\beta=-3.782$ ,  $p<0.001$ ),  
45  
46 38 occupation ( $\beta=-3.592$ ,  $p<0.001$ ), economic status ( $\beta=-0.669$ ,  $p<0.040$ ), and the number of  
47  
48 39 household members ( $\beta=-1.737$ ,  $p<0.001$ ).  
49  
50  
51  
52  
53  
54  
55  
56  
57  
58  
59  
60

1  
2  
3 41 **Conclusion:** This study revealed some potentially troubling knowledge gaps which underscore  
4  
5 42 the need for a vigorous public education campaign. This campaign must reinforce the public's  
6  
7 43 awareness, knowledge, and vigilance towards precautionary measures against COVID-19, and  
8  
9 44 most importantly aid in controlling the worldwide spread of the disease.  
10  
11  
12  
13  
14

15 46 **Strengths and limitations of this study:**

16  
17 47 . This study assesses COVID-19 knowledge and identifies poor knowledge factors  
18  
19

20 48 . Data are derived from a large, national survey across Syria, during the lockdown period.  
21  
22

23  
24 49 . The survey covered socio-demographic information, general knowledge, transmission,  
25  
26 50 symptoms, and prevention.  
27  
28

29 51 . Results have broad implications for public health programming and response to COVID-19  
30  
31 52 in Syria.  
32  
33

34  
35 53 . This web-based cross-sectional study cannot be generalized towards the Syrian population.  
36  
37

38  
39  
40

41 55 **Keywords:** Awareness; Knowledge; COVID-19; Pandemic; Syria; War; Population.  
42  
43

44  
45  
46

47 57 **Background:**

48  
49  
50  
51 58 Coronavirus disease 2019 (COVID-19) is a highly infectious respiratory disease that  
52  
53 59 evolved into a worldwide pandemic threatening a prolonged economic recession. The first  
54  
55 60 incidence was reported at a local seafood market in Wuhan, China.<sup>1</sup> The virus continues to  
56  
57 61 spread resulting in growing morbidity and mortality cases, hitting the poorest and most  
58  
59  
60

1  
2  
3 62 vulnerable in the world. Many studies have assessed symptom clusters, transmission pathways,  
4  
5 63 and prevention methods; however, many aspects have yet to be proven.<sup>2,3</sup> Sexual transmission,  
6  
7  
8 64 horizontal transmission, animal to human transmission, permanent immunity, and fetal  
9  
10 65 abnormalities as a result of maternal infection are unproven.

11  
12 66 The battle against COVID-19 in Syria is still in its infancy. The first confirmed case  
13  
14 67 was announced on March 22,<sup>4</sup> and there had only been 44 cases and 3 deaths to date. These  
15  
16 68 figures are significantly lower than neighbouring countries such as Turkey (127,659 and  
17  
18 69 3,461), Iran (98,647 and 6,277), Iraq (2,346 and 98), Lebanon (740 and 25), and Jordan (465  
19  
20 70 and 9).<sup>5</sup> The Syrian healthcare system is severely under-equipped and lacks the capacity to  
21  
22 71 contain such a crisis. The estimated number of intensive care unit (ICU) beds with ventilators  
23  
24 72 is a mere 325, and the theoretical maximum number of cases that can be adequately treated is  
25  
26 73 only 6,500.<sup>6</sup> Once this maximum threshold capacity is exceeded, drastic rationing decisions  
27  
28 74 will have to be made. Therefore, cooperation with and response to guidance from the WHO  
29  
30 75 are of utmost importance. Unprecedented measures have been adopted to control the spread of  
31  
32 76 COVID-19 in Syria.<sup>6</sup> The public's adherence to these control measures- is largely affected by  
33  
34 77 their awareness, knowledge, and attitudes towards pandemics.<sup>7,8</sup>

35  
36  
37  
38  
39 78 The Syrian conflict, now in its 10<sup>th</sup> year, has resulted in the worst refugee crisis since  
40  
41 79 World War II.<sup>9</sup> The devastating impact of war has placed the public health system under  
42  
43 80 constant strain; the numbers of casualties continue to rise, 70% of health care workers have  
44  
45 81 fled the country, the annihilation of healthcare facilities, and the "weaponization" of the  
46  
47 82 healthcare are ongoing challenges.<sup>6,10</sup> These challenges along with dense residential areas, the  
48  
49 83 growing prevalence of chronic illness, and 83% of the population living under the poverty line  
50  
51 84 make Syria highly vulnerable to a severe outbreak.<sup>6,11</sup>

52  
53  
54  
55  
56 85 While some studies have been conducted to assess the knowledge, attitude, and  
57  
58 86 practices among populations during this pandemic, including one done in China, none have  
59  
60

1  
2  
3 87 done so in Syria.<sup>12-19</sup> To our knowledge this first study that aims to measure the awareness and  
4  
5 88 general knowledge of COVID-19 among the Syrian population at a time where ambiguity and  
6  
7 89 misinformation are rampant. The objective of this study is to gauge specific knowledge around  
8  
9 90 clinical features, transmission pathways, and prevention methods, and to identify factors  
10  
11 91 associated with poor knowledge to help facilitate outbreak management in Syria during this  
12  
13 92 rapid global rise of the COVID-19 pandemic. The information gleaned from this research will  
14  
15 93 help with public health programming and response to COVID-19 in Syria as the pandemic  
16  
17 94 continues to unfold.  
18  
19  
20  
21  
22  
23  
24

## 25 96 **Methods:**

### 26 27 28 97 **Study design, setting and, participants:**

29  
30  
31  
32 98 This web-based cross-sectional survey was conducted between March 31<sup>st</sup> and April  
33  
34 99 4<sup>th</sup>, during the lockdown period. Ethical approval was obtained from the Institutional Review  
35  
36 100 Board (IRB) of the Faculty of Medicine, Syrian Private University. All participants, who  
37  
38 101 completed the survey, and residing in Syria with no known history of COVID-19 infection  
39  
40 102 were included in the study. The authors designed questions that were modelled after existing  
41  
42 103 surveys.<sup>12 13</sup> The survey was translated to Arabic and was reviewed by two dialectologists and  
43  
44 104 two infectious disease specialists, who evaluated whether the survey questions effectively  
45  
46 105 assessed COVID-19 knowledge, and checked for double-barrelled and confusing questions, to  
47  
48 106 ascertain the validity. We conducted a pilot study on 20 people to assess reliability clarity,  
49  
50 107 relevance, and the acceptability of the survey; these were excluded from the final sample to  
51  
52 108 avoid bias. Modifications were made based on feedback received to facilitate better  
53  
54 109 comprehension before distributing the final survey to the general population. The Arabic-  
55  
56 110 language survey was posted on various social media platforms including WhatsApp, Telegram,  
57  
58  
59  
60

1  
2  
3 111 Instagram, and Facebook targeting various social groups. To avoid non-response bias the  
4  
5 112 survey was distributed during lockdown where the majority of the population were out of work  
6  
7  
8 113 and at home, GIFs and posts were adapted to appeal to each social group, the questions were  
9  
10 114 made short and in the form of multiple choice questions that required no typing, and the ability  
11  
12 115 for viewers to comment on the link increased the popularity of the survey. Participants  
13  
14 116 confirmed their voluntary participation by answering a yes-no question, were informed of the  
15  
16 117 option to opt-out of the survey at any time, and were assured of the confidentiality and  
17  
18 118 anonymity of their responses. After confirmation, participants were directed to the first part of  
19  
20 119 the survey to complete questions about socio-demographic information including, age, gender,  
21  
22 120 residence, education level, occupation, and economic status. Participants under the age of 18  
23  
24 121 required informed parental consent, as well as submission of parent/guardian contact  
25  
26 122 information. The researchers were responsible for contacting the parents/guardians to obtain  
27  
28 123 consent before the child was given access to the survey. The sample size calculated was 2401  
29  
30 124 participants based on an error margin of 2%, and a confidence level of 95%, for a population  
31  
32 125 of 18284423 people using a sample size calculator (website:  
33  
34 126 <https://www.surveysystem.com/sscalc.htm>). The self-administered survey contained 40  
35  
36 127 questions divided into 4 sections: general knowledge (10 questions), transmission pathways (7  
37  
38 128 questions), clinical features (12 questions), and prevention methods (11 questions). The survey  
39  
40 129 is available in appendix 1.  
41  
42  
43  
44  
45  
46  
47

### 48 **Patient and public involvement:**

49  
50  
51 131 The public were not involved in the study design, conduct of the study, or plans to disseminate  
52  
53 132 the results to study participants.  
54  
55  
56  
57  
58  
59  
60



### 133 **Statistical analysis**

134 A scoring system was used to analyse the participants' knowledge: a score of "1" was  
135 given for a correct answer and a score of "0" was given for an incorrect answer. The percentage  
136 score for mean knowledge was calculated as follows: sum of scores obtained/maximum scores  
137 that could be obtained  $\times$  100. Participants' total mean knowledge in all the subsections, and  
138 mean knowledge of each subsection were calculated. Data were analysed using the Statistical  
139 Package for Social Sciences version 25.0 (SPSS Inc., Chicago, IL, United States) and reported  
140 as frequencies and percentages (for categorical variables) or means and standard deviations  
141 (SD) (for continuous variables). The t-test was applied to compare mean knowledge scores  
142 against both genders, and 3 questions (knowing an infected individual, use of personal  
143 belongings and dissemination of knowledge). The t-test was applied to compare mean  
144 knowledge scores against age. One-way analysis of variance (ANOVA) was applied using f-  
145 test to compare mean knowledge scores against socio-demographic variables (age, social  
146 status, residence, education level, occupation, economic status, and number of household  
147 members), and source of information. Multivariable linear regression analysis using the socio-  
148 demographic variables as independent variables (categorical) and mean knowledge score as the  
149 outcome variable (continuous) was conducted to identify factors associated with knowledge.  
150 Factors were selected with a backward method and were analysed using unstandardized  
151 coefficient ( $\beta$ ), odds ratio (OR), and 95% confidence interval. P-values $<$ 0.05 were considered  
152 statistically significant.

153

### 154 **Results:**

1  
2  
3 155 **Socio-demographics characteristics:**  
4  
5

6 156 Of 4495 total participants who completed the survey, participants with no known  
7  
8 157 history of Covid-19 infection, residing outside Syria, and who did not fully complete the survey  
9  
10 158 were excluded. The final sample of 3586 participants (completion rate= 79.8%) consisted of  
11  
12 159 2444(68.2%) females and 1142(31.8%) males. Participants aged >20 years were the majority  
13  
14 160 1204(33.6%) while participants between 35 and 39 were the minority 186(5.2). Participant ages  
15  
16 161 ranged from 12-78 years with a mean of 30 ( $\pm 10$ ) years). 2279(63.6%) participants were single,  
17  
18 162 1822(50.8%) were unemployed, 1064(29.7%) were smokers, and 428(11.9%) were alcohol  
19  
20 163 consumers (Table 1). The majority of participants were residents of Damascus/ Rural  
21  
22 164 Damascus 2019(56.3%) and had attained college/university level education (Figure1).  
23  
24  
25  
26  
27

28 165 **General Knowledge regarding COVID-19:**  
29  
30

31 166 Participants showed a good level of awareness regarding COVID-19 ( $75.6 \pm 9.4\%$ ). An  
32  
33 167 adequate level of basic knowledge ( $67.0 \pm 18.9\%$ ) was found among participants, 3383(94.3%)  
34  
35 168 knew that a virus was the causative agent of COVID-19; 2535(70.7%) correctly identified the  
36  
37 169 incubation period as being between 2 days and 2 weeks. Only 1500(41.8%) knew that an  
38  
39 170 infection with COVID-19 does not confer lifelong immunity. The majority of participants  
40  
41 171 3489(97.3%) were aware that COVID-19 infection in high-risk groups can be fatal. There is  
42  
43 172 currently insufficient evidence on whether infertility is a complication of COVID-19 infection;  
44  
45 173 461(12.9%) participants believed that COVID-19 can cause infertility while 1903(53.0%) did  
46  
47 174 not. 2986(83.3%), and 2597(72.4%) correctly answered that there are currently no available  
48  
49 175 vaccine or treatments; however, there were misconceptions about the efficacy of antibiotics  
50  
51 176 and Ibuprofen as treatments, 1228(34.2%) and 1268(35.3%) respectively (Table 2).  
52  
53  
54  
55  
56  
57  
58  
59  
60

## 177 **Transmission and Signs and Symptoms regarding COVID-19:**

178 There was a fair level of awareness ( $70.7 \pm 16.9\%$ ) regarding COVID-19 transmission  
179 pathways. A high level of awareness was demonstrated regarding common transmission  
180 pathways: 3521(98.2%), 3387(94.4%), and 3330(92.9%) identified respiratory droplets,  
181 touching an infected person's personal belongings, and handshaking respectively. There is  
182 currently limited evidence on animal-to-human and sexual transmission; 703(19.6%) did not  
183 know if transmission occurs between animals and humans, while 899(25.1%) did not know if  
184 the virus is transmitted sexually (Table 2).

185 The data showed a good level of awareness ( $76.0 \pm 13.6\%$ ) regarding clinical features.  
186 When asked about the main clinical features, participants correctly identified, fever  
187 3563(99.4%), sore throat 3037(84.7%), headache 3186(88.8%), chest pain 3050(85.0%),  
188 general pain 3019(84.2%), fatigue 3405(95.0%), and dry cough 3466(96.7%), whereas only  
189 1972(55.0%) knew that diarrhea can be a symptom. Only 2221(61.9%) were aware that  
190 infected individuals may be asymptomatic (Table 2).

## 191 **Prevention Methods regarding COVID-19:**

192 The highest level of awareness was in the prevention section ( $88.8 \pm 10.2\%$ ). Washing  
193 hands with soap, avoiding crowded areas, remaining at home, and wearing a face mask outside  
194 are the principal preventative measures against COVID-19, 3574(99.7%), 3574(99.75%),  
195 3554(99.1%), and 3204(89.3%), respectively. A minority 158(4.4%) believed that cleaning  
196 with a mixture of Flash and bleach is a sound preventive measure. Only 2482(69.2%) knew  
197 that the flu vaccine offers no protection against COVID-19 (Table 2).

## 198 **Statistical Analysis of the Data:**

199 A series of one way ANOVA analyses revealed that mean knowledge differed  
200 significantly across: gender (p-value=0.009), age (p-value=0.003), social status (p-

201 value=0.042), education level (p-value<0.001<0.001), economic status (p-  
202 value<0.001<0.001), number of household members (p-value<0.001<0.001), place of  
203 residence (p-value<0.001), and source of information (p-value<0.001) (Table 3). Participants  
204 living in Lattakia (77.6%) exhibited the greatest awareness, whereas those in Ar-Raqqah  
205 (71.7%) followed by Deir-ez-Zor (71.8%) exhibited the lowest. The mean knowledge differed  
206 across groups that acquired information from different sources, the lowest awareness was  
207 among participants who chose family members/friends as one of their source(s) (74.0%),  
208 whereas those with the highest awareness acquired their information from lectures as one of  
209 their source(s) (78.2%) , (Table 3).

210 When participants were asked if they were likely to share new information with friends  
211 and family, 3513(98.0%) answered “yes”. There was a significant difference in mean  
212 knowledge between those who were inclined to disseminate new information about COVID-  
213 19 to friends and family (75.7%) compared with those who were not (72.3%) (p-value=0.002).  
214 On exclusive use of personal belongings, 2692(75.1%) answered “yes”. We found no  
215 significant correlation between mean knowledge and participant tendency to share personal  
216 belongings with others (p-value=0.112). Of participants who knew someone infected with  
217 COVID-19, 65(1.8%) answered “yes”. There was no significant difference in mean knowledge  
218 between those who knew an infected individual (75.9%) compared with those who did not  
219 (75.6%) (p-value=0.816).

#### 220 **Multiple linear regression:**

221 Multiple linear regression analysis results: male gender (vs. female,  $\beta$ =-0.933, p=0.005);  
222 education of secondary school or lower (vs. college/university and above,  $\beta$ =-3.782, p<0.001);  
223 careers in government, private, business, military, and “other” sectors, as well as  
224 unemployment (vs. health care workers,  $\beta$ =-3.592, p<0.001); poor and moderate economic

1  
2  
3 225 status (vs. good and excellent,  $\beta=-0.669$ ,  $p<0.040$ ); and over 5 household members (vs. of 1-  
4  
5 226 5,  $\beta=-1.737$ ,  $p<0.001$ ) were associated with significantly lower knowledge scores (Table 4).  
6  
7 227 Careers in health care (vs. Unemployed,  $\beta=3.592$ ,  $p\text{-value}=\leq 0.001$ ), and the 31-45 age  
8  
9 228 group (vs. 16-30,  $\beta=1.511$ ,  $p\text{-value}=0.005$ ) were associated with significantly higher  
10  
11  
12 229 knowledge scores.  
13  
14  
15  
16 230  
17  
18

## 19 231 **Discussion:**

20  
21  
22 232 During this time of Covid-19, the amount of ambiguity is larger than normal, we cannot  
23  
24 233 know for sure when there will be vaccines or treatments, neither provide sufficient evidence to  
25  
26 234 support Sexual transmission, horizontal transmission, animal to human transmission,  
27  
28 235 permanent immunity, and fetal abnormalities as a result of maternal infection. We found an  
29  
30 236 overall mean knowledge score of 75.6%, indicating that most participants were relatively  
31  
32 237 knowledgeable about COVID-19, though less so compared to their counterparts in China  
33  
34 238 (90%).<sup>12</sup> This level of knowledge was unexpected given that when we carried out the survey,  
35  
36 239 only 10 cases of COVID-19 had been confirmed in Syria.<sup>20</sup>  
37  
38  
39  
40  
41

42 240 We found that poor knowledge was associated with males, non-post-secondary  
43  
44 241 education, non-healthcare occupations, unemployment, poor and moderate economic status,  
45  
46 242 and households exceeding 5 members. Similar trends were observed in China.<sup>12</sup> Correlating  
47  
48 243 socio-demographic variables with awareness is critical to public health efforts to mitigate the  
49  
50 244 spread of COVID-19. This data obtained can be leveraged by the Syrian Ministry of Health to  
51  
52 245 tailor prevention and educational campaigns to populations with the widest knowledge gaps.  
53  
54  
55

56 246 In the general knowledge section (67%), the majority of the participants 3383(94.3%)  
57  
58 247 knew that COVID-19 is caused by a virus, similar to a Pakistani study (93.3%).<sup>17</sup> Low  
59  
60

1  
2  
3 248 awareness of the 2 to 14 day incubation period was found,<sup>21</sup> among dentists (36.1%), and health  
4  
5 249 care workers (HCW) (36.4%).<sup>13 19</sup> Our study showed a higher level of awareness 2535(70.7%)  
6  
7  
8 250 among the population. Syria has a relatively young population; 2018 showed that only 4.5% of  
9  
10 251 the population was over 65.<sup>22</sup> 3489(97.3%) knew that COVID-19 infection can be severe and  
11  
12 252 lead to death in elderly, chronically ill, and immunodeficient patients. This is higher than  
13  
14 253 studies conducted in China (73.2%), and India (88.37%).<sup>12 23</sup> 40.6% of Syrians are  
15  
16 254 hypertensive, yet a staggering 79.8% of them are unaware of their condition. Diabetes is also  
17  
18 255 prevalent, affecting 11.9% of the population.<sup>24 25</sup> Such a rampant lack of awareness about  
19  
20 256 chronic disease in the population can be fatal and underscores the need for targeted awareness  
21  
22 257 campaigns.

23  
24  
25  
26  
27 258 Only 2597(72.4%) participants knew that there is currently no available treatment; this  
28  
29 259 is higher than a Kenyan study (40%) but significantly lower than a Chinese study (94%).<sup>12 15</sup>  
30  
31 260 A minority 103(2.9%) participants thought there was a vaccine available against COVID-19;  
32  
33 261 by contrast, Coimbatore District (18.6%) and Pakistan (11.6%) were misinformed. In the  
34  
35 262 absence of a vaccine or effective treatment protocol for COVID-19, controlling the spread of  
36  
37 263 the disease is the best line of defence. We observed a considerable knowledge gap in  
38  
39 264 1268(35.3%) with regards to ibuprofen as a treatment option. There is no available evidence to  
40  
41 265 suggest that ibuprofen is effective against COVID-19.<sup>26</sup>

42  
43  
44  
45 266 Participants showed a fair level of awareness regarding transmission pathways (70.7%),  
46  
47 267 very similar to a Pakistani study (70.8%).<sup>17</sup> The majority 3521(98.2%) of participants were  
48  
49 268 aware that respiratory droplets are common transmission vectors this is similar to a Chinese  
50  
51 269 study (97.8%), but much higher than an Indian study (29.5%).<sup>12 16</sup> WHO advice on physical  
52  
53 270 distancing include: using greetings that replace physical contact with a wave, nod, bow, peace  
54  
55 271 sign, sign language, friendly words or smiles.<sup>27 28</sup> 3330(92.9%) participants identified  
56  
57 272 handshaking as a transmission pathway, higher than a study among dentists (85.6%).<sup>13</sup>  
58  
59  
60

1  
2  
3 273 A good level of awareness was found regarding the clinical features of COVID-19  
4  
5 274 (76.0%), similar to a Pakistani (77.7%).<sup>17</sup> A very high level of awareness of the most common  
6  
7  
8 275 symptoms was found: fever 3563(99.4%), dry cough 3466(96.7%), fatigue 3405(95.0%), and  
9  
10 276 myalgia 3019(84.2%), similar to findings from Chinese (96.4%) and Indian (95.4%) studies.<sup>12</sup>  
11  
12 277 <sup>23</sup> When asked about sore throat, a higher level of awareness 3037(84.7%) was found compared  
13  
14 278 to studies from India (15.2%) and among dentists (28.5%).<sup>13 16</sup> Knowledge about diarrhea as a  
15  
16 279 symptom was lacking: only 1972(55.0%); a study among dentists also showed low awareness  
17  
18 280 (39.9%).<sup>13 16</sup> While infected individuals are frequently asymptomatic, or present with mild  
19  
20 281 symptoms, around 1 in every 5 infections can be serious enough to require hospitalisation.<sup>29 30</sup>  
21  
22 282 Only 2221(61.9%) participants were aware that infected individuals can be asymptomatic,  
23  
24 283 while a study among dentists (34.5%) reported much lower awareness. “Silent spreaders” may  
25  
26 284 significantly contribute to the transmission of COVID-19, and so increasing public awareness  
27  
28 285 of this particular point is crucial  
29  
30  
31  
32

33 286 We found a high level of awareness in the preventive methods section (88.8%), similar  
34  
35 287 to a study in Pakistan (85%).<sup>17</sup> Hand hygiene is considered an important element of infection  
36  
37 288 control dating back to the revolutionary work of Ignaz Semmelweis.<sup>31</sup> Implementing hand-  
38  
39 289 washing techniques can break the transmission cycle and reduce the risk of infection by 6%-  
40  
41 290 44%.<sup>32</sup> Almost all 3574(99.7%) participants were aware that washing hands with soap and  
42  
43 291 water is an important preventive measure against COVID-19. This finding is in accordance  
44  
45 292 with India (97.0%), and other studies (96.2%, and 87%).<sup>13 16 19</sup>  
46  
47  
48

49 293 This year the WHO recommended that the following mitigation measures be  
50  
51 294 implemented during the holy month of Ramadan: cancelling social and religious gatherings,  
52  
53 295 holding events outdoors for adequate ventilation, physical distancing of at least 1 meter  
54  
55 296 between people, and the use of technology to broadcast ceremonies on television.<sup>27 28</sup> The  
56  
57 297 majority 3574(99.7%) identified avoiding mass gatherings as a preventive measure; studies in  
58  
59  
60



1  
2  
3 298 China (98.6%) and Coimbatore District (97.7%) reported similar awareness.<sup>12 23</sup> Cheap and  
4  
5 299 efficient interventions such as N95 (filtration capacity=95%) have a 91% effectiveness of  
6  
7 300 blocking pathogen transmission.<sup>33</sup> 3204(89.3%) participants considered wearing a face mask  
8  
9 301 when leaving home as an effective prevention method, compared with a Coimbatore District  
10  
11 302 study (93.02%).<sup>23</sup>

12  
13  
14 303 Since Syrian society is particularly vulnerable to COVID-19, this knowledge gap is  
15  
16 304 potentially dangerous and should be addressed to mitigate disease spread. Only 2482(69.2%)  
17  
18 305 knew that the flu vaccine offers no protection against COVID-19; this is similar to a  
19  
20 306 Coimbatore District study (67.4%), but lower than a study amongst HCWs (90.7%).<sup>19 23</sup> Mixing  
21  
22 307 flash with bleach is highly toxic and caustic to the respiratory tract. Only a minority of  
23  
24 308 participants 158(4.4%) believed that this method of cleaning is a sound preventive measure.  
25  
26 309 3305(92.2%) were aware that individuals showing symptoms should quarantine themselves,  
27  
28 310 lower than in China (98.2%) and India (95.8%).<sup>12 16</sup>

29  
30  
31 311 North-East Syria (NES) has a population of over 4 million people, 600,000 of whom  
32  
33 312 are internally displaced refugees, 100,000 of whom live in overcrowded camps: only 2 of  
34  
35 313 NES's 11 hospitals are currently functioning. NES consists of 3 governorates: Ar-Raqqah,  
36  
37 314 Deir-ez-Zor, and Al-Hasakah. With only 22 ICU beds, (18 in Al-Hasakah, 4 in Ar-Raqqah, and  
38  
39 315 none in Deir-ez-Zor), the maximum capacity threshold is only 80 COVID-19 cases. Ar-Raqqah  
40  
41 316 and Deir-ez-Zor, the most vulnerable governorates, also showed the lowest awareness in the  
42  
43 317 study (71.7%), and (71.8%). This is a potentially catastrophic situation, and a concern to the  
44  
45 318 international community, as an unmonitored, uncontrolled outbreak in NES can prolong the  
46  
47 319 global pandemic.

48  
49  
50  
51  
52 320

53  
54  
55  
56  
57 321 **Limitations:**



1  
2  
3 322 Our findings can only be generalized about online users of well-educated Syrians of  
4  
5 323 good socio-economic status. Syrians vulnerable to COVID-19, such as the elderly and rural  
6  
7 324 residents, are more likely to exhibit poor knowledge and awareness due to limited internet  
8  
9 325 access. As such, reaching out to these populations must be prioritized. Even though all Syrian  
10  
11 326 governorates were represented in this study, most participants lived in Damascus and Rural  
12  
13 327 Damascus. Furthermore, an assessment of attitudes and practice towards COVID-19 is needed.  
14  
15 328

16  
17  
18  
19  
20 329 **Conclusion:**  
21  
22

23  
24 330 COVID-19 has been a dire warning to humanity about the fragility of its social,  
25  
26 331 economic, and healthcare institutions. Our study revealed good public awareness of clinical  
27  
28 332 features and preventive measures. However general knowledge and knowledge about  
29  
30 333 transmission pathways was suboptimal. Syrians of good socio-economic status, in particular  
31  
32 334 young well-educated women, have shown good knowledge. Our national response must adapt  
33  
34 335 to the growing threat of COVID-19 by adopting public awareness strategies and behaviours to  
35  
36 336 contain the disease both within and beyond our borders.  
37  
38  
39

40 337  
41  
42  
43 338 **Abbreviations:** COVID-19: Coronavirus Disease 2019; MERS: Middle East Respiratory  
44  
45 339 Syndrome; SARS: Severe Acute Respiratory Syndrome; WHO: World Health Organization;  
46  
47 340 PHEIC: Public Health Emergency of International Concern; ICU: Intensive care unit; IRB:  
48  
49 341 Institutional Review Board; SPSS: Statistical Package for Social Sciences; SD: Standard  
50  
51 342 Deviation; HCW: Health Care Worker.  
52  
53  
54

55  
56 343  
57  
58  
59  
60 344 **Acknowledgments:**

1  
2  
3 345 We are thankful to the management of the Syrian Private University for the support in  
4  
5 346 the field of medical training and research. We are thankful to everyone who participated in this  
6  
7  
8 347 study and for Mrs. Marah Muarrawi to her statistical help.  
9

10 348

11  
12  
13  
14 349 **Funding:**

15  
16  
17 350 This research received no specific grant from SPU or any other funding agency in the  
18  
19 351 public, commercial or non-profit sectors.  
20

21 352

22  
23  
24  
25 353 **Availability of data and materials:**

26  
27  
28 354 All data related to this paper's conclusion are available and stored by the authors. All  
29  
30 355 data are available from the corresponding author on a reasonable request.  
31

32 356

33  
34  
35  
36 357 **Declarations:**

37  
38 358 **Ethics approval and consent to participate:**

39  
40 359 This study was approved by the Institutional Review Board (IRB) at the Syrian Private  
41  
42 360 University (SPU). All Participants confirmed their written consent by answering a yes-no  
43  
44 361 question. Participants under the age of 18 required verbal informed parental consent, as well as  
45  
46 362 submission of parent/guardian contact information. The researchers were responsible for  
47  
48 363 contacting the parents/guardians to obtain verbal consent before the child was given access to  
49  
50 364 the survey. The verbal and written form of consent was approved by the IRB at SPU.  
51  
52 365 Participation in the study was voluntary and participants were assured that anyone who was  
53  
54 366 not inclined to participate or decided to withdraw after giving consent would not be victimized.  
55  
56 367 All information collected from this study was kept strictly confidential.  
57  
58  
59  
60

368 **Consent for Publication:**

369 Not applicable.

370 **Competing interests:**

371 The authors declare that they have no competing interests.

372 **Authors' contributions:**

373 FM conceptualized the study, participated in the design, wrote the study protocol,  
 374 performed the statistical analysis, did a literature search, and drafted the manuscript. BB  
 375 participated in study design, did a literature search, and drafted the manuscript. HA, and ND  
 376 did a literature search, and revision of the draft. All authors read and approved the final draft.

378 **Tables and Figures:**379 **Table 1.**380 **Table 1. Socio-demographic characteristics: (n=3586)**

|            |        |            |               |                     |            |
|------------|--------|------------|---------------|---------------------|------------|
| Gender (%) | Male   | 1142(31.8) | Education (%) | Primary School      | 25(0.7)    |
|            | Female | 2444(68.2) |               | Intermediate School | 166(4.6)   |
| Age (%)    | <20    | 1204(33.6) |               | Secondary school    | 375(10.4)  |
|            | 20-24  | 1104(30.8) |               | College/University  | 2839(79.2) |
|            | 25-29  | 446(12.4)  |               | Master's degree     | 157(4.4)   |
|            | 30-34  | 266(7.4)   |               | PhD                 | 24(0.7)    |

|                            |                          |                   |                              |                               |                   |
|----------------------------|--------------------------|-------------------|------------------------------|-------------------------------|-------------------|
|                            | <b>35-39</b>             | <b>186(5.2)</b>   | <b>Occupation (%)</b>        | <b>Health care worker</b>     | <b>634(17.7)</b>  |
|                            | <b>&gt;39</b>            | <b>380(10.6)</b>  |                              | <b>Government institution</b> | <b>283(7.9)</b>   |
| <b>Social Status (%)</b>   | <b>Single</b>            | <b>2279(63.5)</b> | <b>Household members (%)</b> | <b>Private institution</b>    | <b>182(5.1)</b>   |
|                            | <b>In a relationship</b> | <b>286(8.0)</b>   |                              | <b>Business</b>               | <b>198(5.5)</b>   |
|                            | <b>Married</b>           | <b>943(26.3)</b>  |                              | <b>Military</b>               | <b>32(0.9)</b>    |
|                            | <b>Divorced</b>          | <b>46(1.3)</b>    |                              | <b>Unemployed</b>             | <b>1822(50.8)</b> |
|                            | <b>Widowed</b>           | <b>32(0.9)</b>    |                              | <b>Other</b>                  | <b>435(12.1)</b>  |
| <b>Economic Status (%)</b> | <b>Poor</b>              | <b>247(6.9)</b>   | <b>0</b>                     | <b>46(1.3)</b>                |                   |
|                            | <b>Moderate</b>          | <b>1247(34.8)</b> | <b>1-5</b>                   | <b>2751(76.7)</b>             |                   |
|                            | <b>Good</b>              | <b>1761(49.1)</b> | <b>&gt;5</b>                 | <b>789(22)</b>                |                   |
|                            | <b>Excellent</b>         | <b>331(9.2)</b>   |                              |                               |                   |

381

1  
2  
3 382 <sup>1</sup>Poor: income does not provide essential needs for the family. <sup>2</sup>Moderate: income provides essential  
4 383 needs for the family but no more. <sup>3</sup>Good: income provides essential needs and some luxury  
5 384 requirements. <sup>4</sup>Excellent: income provides luxury requirements.  
6  
7  
8 385  
9  
10  
11 386 **Table 2.**  
12  
13 387  
14 388

16  
17 **Table 2. General Knowledge, Transmission, Signs and Symptoms, and Prevention of COVID-19:**  
18  
19 **(n=3586)**  
20  
21

| General Knowledge                  |                      |              |                                      |                       |            |
|------------------------------------|----------------------|--------------|--------------------------------------|-----------------------|------------|
| <b>Causative Agent</b><br><br>N(%) | Virus                | 3383(94.3)   | <b>Incubation period</b><br><br>N(%) | 1 Minute to<br>1 Hour | 18(0.5)    |
|                                    | Bacteria             | 39(1.1)      |                                      | 1 Hour to<br>2 Days   | 58(1.6)    |
|                                    | Parasite             | 8(0.2)       |                                      | 2 Days to 2<br>Weeks  | 2535(70.7) |
|                                    | Immune<br>deficiency | 46(1.3)      |                                      | 2 Weeks to<br>1 Month | 958(26.7)  |
|                                    | Fungus               | 0(0.0)       |                                      | >1 Month              | 17(0.5)    |
|                                    | Inherited            | 2(0.1)       |                                      |                       |            |
|                                    | Do Not Know          | 108(3.0)     |                                      |                       |            |
| <b>YES(%)</b>                      |                      | <b>NO(%)</b> | <b>DO NOT<br/>KNOW(%)</b>            |                       |            |

|                                                          |                                                                                                                       |            |            |            |
|----------------------------------------------------------|-----------------------------------------------------------------------------------------------------------------------|------------|------------|------------|
| 1<br>2<br>3<br>4<br>5<br>6<br>7<br>8                     | <b>Can infection with COVID-19 confer permanent immunity?</b>                                                         | 815(22.7)  | 1500(41.8) | 1271(35.5) |
| 9<br>10<br>11<br>12<br>13<br>14<br>15<br>16<br>17        | <b>Can COVID-19 cause severe illness and lead to death in elderly, chronically ill, and immunodeficient patients?</b> | 3489(97.3) | 28(0.8)    | 69(1.9)    |
| 18<br>19<br>20                                           | <b>Can COVID-19 cause infertility?</b>                                                                                | 461(12.9)  | 1222(34.1) | 1903(53.0) |
| 21<br>22<br>23<br>24<br>25<br>26<br>27<br>28<br>29       | <b>Is COVID-19 teratogenic (i.e. cause malformations/ abnormalities to an embryo/fetus)?</b>                          | 157(4.4)   | 1433(40.0) | 1996(55.6) |
| 30<br>31<br>32<br>33<br>34                               | <b>Is there no available treatment against COVID-19?</b>                                                              | 2597(72.4) | 515(14.4)  | 474(13.2)  |
| 35<br>36<br>37<br>38<br>39                               | <b>Can COVID-19 be treated with antibiotics?</b>                                                                      | 1228(34.3) | 1790(49.9) | 568(15.8)  |
| 40<br>41<br>42<br>43<br>44                               | <b>Can COVID-19 be treated with Ibuprofen?</b>                                                                        | 1268(35.3) | 1921(53.6) | 397(11.1)  |
| 45<br>46<br>47<br>48<br>49                               | <b>Are there available COVID-19 vaccines?</b>                                                                         | 103(2.9)   | 2986(83.3) | 497(13.8)  |
| 50                                                       | <b>Transmission Pathways</b>                                                                                          |            |            |            |
| 51<br>52<br>53<br>54<br>55<br>56<br>57<br>58<br>59<br>60 | <b>Respiratory droplets (from coughing or sneezing)</b>                                                               | 3521(98.2) | 21(0.6)    | 44(1.2)    |

|                                                          |            |            |            |
|----------------------------------------------------------|------------|------------|------------|
| <b>Handshaking</b>                                       | 3330(92.9) | 189(5.3)   | 67(1.8)    |
| <b>Touching an infected person's personal belongings</b> | 3387(94.4) | 131(3.7)   | 68(1.9)    |
| <b>Animals-to-human</b>                                  | 910(25.4)  | 1973(55.0) | 703(19.6)  |
| <b>Undercooked food</b>                                  | 1301(36.3) | 1734(48.3) | 551(15.4)  |
| <b>Sexual contact</b>                                    | 1210(33.7) | 1477(41.2) | 899(25.1)  |
| <b>Horizontal transmission</b>                           | 1130(31.5) | 1160(32.4) | 1296(36.1) |
| <b>Signs and Symptoms</b>                                |            |            |            |
| <b>Fever</b>                                             | 3563(99.4) | 9(0.2)     | 14(0.4)    |
| <b>Sneezing</b>                                          | 2353(65.6) | 1000(27.9) | 233(6.5)   |
| <b>Sore throat</b>                                       | 3037(84.7) | 358(10.0)  | 191(5.3)   |
| <b>Headache</b>                                          | 3186(88.8) | 190(5.3)   | 210(5.9)   |
| <b>Chest pain</b>                                        | 3050(85.0) | 254(7.1)   | 282(7.9)   |
| <b>Body aches (generalized pain)</b>                     | 3019(84.2) | 260(7.2)   | 307(8.6)   |
| <b>Fatigue</b>                                           | 3405(95.0) | 72(2.0)    | 109(3.0)   |
| <b>Diarrhea</b>                                          | 1972(55.0) | 971(27.1)  | 643(17.9)  |
| <b>Dry cough</b>                                         | 3466(96.7) | 44(1.2)    | 76(2.1)    |
| <b>Productive cough</b>                                  | 458(12.8)  | 2586(72.1) | 542(15.1)  |
| <b>Bleeding</b>                                          | 130(3.6)   | 2613(72.9) | 843(23.5)  |

|                                                                                                |            |            |           |
|------------------------------------------------------------------------------------------------|------------|------------|-----------|
| <b>Asymptomatic</b>                                                                            | 2221(61.9) | 375(10.5)  | 990(27.6) |
| <b>Prevention Methods</b>                                                                      |            |            |           |
| <b>Does wearing a face mask outside the home offer protection from COVID-19?</b>               | 3204(89.3) | 314(8.8)   | 68(1.9)   |
| <b>Does washing hands with soap and water offer protection from COVID-19?</b>                  | 3574(99.7) | 5(0.1)     | 7(0.2)    |
| <b>Does avoiding crowded places offer protection from COVID-19?</b>                            | 3574(99.7) | 4(0.1)     | 8(0.2)    |
| <b>Does the flu vaccine offer protection from COVID-19?</b>                                    | 331(9.2)   | 2482(69.2) | 773(21.6) |
| <b>Does staying at home offer protection from COVID-19?</b>                                    | 3554(99.1) | 15(0.4)    | 17(0.5)   |
| <b>Does using hand sanitizer offer protection from COVID-19?</b>                               | 3430(95.6) | 104(2.9)   | 52(1.5)   |
| <b>Does cleaning house items with bleach offer protection from COVID-19?</b>                   | 3408(95.0) | 110(3.1)   | 68(1.9)   |
| <b>Does cleaning fruits and vegetables with soap and water offer protection from COVID-19?</b> | 3262(90.9) | 221(6.2)   | 103(2.9)  |



|                                                                                                  |            |            |           |
|--------------------------------------------------------------------------------------------------|------------|------------|-----------|
| Does cleaning surfaces with a mixture of Flash and bleach offer a safe protection from COVID-19? | 158(4.4)   | 3301(92.1) | 127(3.5)  |
| Does the quarantine of symptomatic individuals protect others from COVID-19?                     | 3305(92.2) | 241(6.7)   | 40(1.1)   |
| Do cumin, anise, and mint offer protection from COVID-19?                                        | 1041(29.0) | 1934(53.9) | 611(17.1) |

389 **Table 3.**

**Table 3. Mean knowledge score of participants by demographic variables, and source of information (one way ANOVA), (n= 3586)**

| Characteristics |        | Number of participants (%) | Mean Knowledge Score ( $\pm$ SD%) | F-test/ T-test | P-value |
|-----------------|--------|----------------------------|-----------------------------------|----------------|---------|
| Gender          | Male   | 1142(31.8)                 | 75.0( $\pm$ 10.1)                 | -2.625         | 0.009*  |
|                 | Female | 2444(68.2)                 | 75.9( $\pm$ 9)                    |                |         |
| Age-group       | <20    | 1204(33.6)                 | 75.0( $\pm$ 9.9)                  | 2.990          | 0.011*  |

|                   |                      |            |             |            |       |
|-------------------|----------------------|------------|-------------|------------|-------|
| <b>(years)</b>    | <b>20-24</b>         | 1104(30.8) | 76.4(±9.3)  |            |       |
|                   | <b>25-29</b>         | 446(12.4)  | 76.0(±9.4)  |            |       |
|                   | <b>30-34</b>         | 266(7.4)   | 75.4(±9.4)  |            |       |
|                   | <b>35-39</b>         | 186(5.2)   | 76.1(±7.6)  |            |       |
|                   | <b>&gt;39</b>        | 380(10.6)  | 75.1(±8.6)  |            |       |
|                   | <b>Social status</b> | Single     | 2279(63.5)  | 75.8(±9.3) | 2.485 |
| In a relationship |                      | 286(8.0)   | 76.6(±8.6)  |            |       |
| Married           |                      | 943(26.3)  | 75.1(±9.4)  |            |       |
| Divorced          |                      | 46(1.3)    | 73.9(±8.8)  |            |       |
| Widowed           |                      | 32(0.9)    | 73.4(±15.9) |            |       |
| <b>Residence</b>  | Urban                | 2426(67.7) | 75.8(±9.3)  | 1.652      | 0.099 |

|                   |                        |            |             |        |         |
|-------------------|------------------------|------------|-------------|--------|---------|
|                   | Rural                  | 1160(32.3) | 75.3(±9.6)  |        |         |
| <b>Education</b>  | Primary school         | 25(0.7)    | 66.5(±12.4) | 26.176 | <0.001* |
|                   | Intermediate school    | 166(4.6)   | 73.2(±9.3)  |        |         |
|                   | Secondary school       | 375(10.4)  | 70.0(±13)   |        |         |
|                   | College/University     | 2839(79.2) | 76.3(±8.9)  |        |         |
|                   | Master's degree        | 157(4.4)   | 77.2(±9.7)  |        |         |
|                   | PhD                    | 24(0.7)    | 76.6(±8.5)  |        |         |
| <b>Occupation</b> | Health care worker     | 634(17.7)  | 78.6(±8.6)  | 16.379 | <0.001* |
|                   | Government institution | 283(7.9)   | 75.7(±7.9)  |        |         |

|                        |                     |            |             |       |         |
|------------------------|---------------------|------------|-------------|-------|---------|
|                        |                     |            |             |       |         |
|                        | Private institution | 182(5.1)   | 75.5(±9)    |       |         |
|                        | Business            | 198(5.5)   | 73.4(±10.2) |       |         |
|                        | Military            | 32(0.9)    | 71.2(±15.6) |       |         |
|                        | Unemployed          | 1822(50.8) | 75.3(±9.2)  |       |         |
|                        | Other               | 435(12.1)  | 74.0(±10.2) |       |         |
| <b>Economic status</b> | Excellent           | 331(9.2)   | 76.6(±11.1) | 7.108 | <0.001* |
|                        | Good                | 1761(49.1) | 76.2(±9.4)  |       |         |
|                        | Moderate            | 1247(34.8) | 74.9(±9)    |       |         |

|                              |                         |             |             |        |         |
|------------------------------|-------------------------|-------------|-------------|--------|---------|
|                              | Poor                    | 247(6.9)    | 74.3(±9.3)  |        |         |
| <b>Household members</b>     | 0                       | 46(1.3)     | 74.4(±10.6) | 15.451 | <0.001* |
|                              | 1-5                     | 2751(76.7)  | 76.1(±9)    |        |         |
|                              | >5                      | 789(22.0)   | 74.0(±10.2) |        |         |
| <b>Source of information</b> | Health websites         | 2823(78.7%) | 76.4(±8.7)  | 24.523 | <0.001* |
|                              | Social media            | 1998(55.7%) | 74.6(±9.6)  |        |         |
|                              | Television/ radio       | 1572(43.8%) | 75.5(±9)    |        |         |
|                              | Family members/ friends | 528(14.7%)  | 74.0(±10.3) |        |         |
|                              | Lectures                | 517(14.4%)  | 78.2(±7.5)  |        |         |
|                              | Magazines/ books        | 266(7.4%)   | 77.6(±8.8)  |        |         |

390

391 **Table 4.**

**Table 4.** Multiple linear regression on variables associated with poor COVID-19 knowledge

| Variable                                                                                                                          | Coefficient | Standard error | t      | P       |
|-----------------------------------------------------------------------------------------------------------------------------------|-------------|----------------|--------|---------|
| Male gender (reference: female)                                                                                                   | -0.933      | 0.334          | -2.794 | 0.005*  |
| education of secondary school or lower (reference: college/university and above)                                                  | -3.782      | 0.466          | -8.125 | <0.001* |
| careers in government, private, business, military, and “other” sectors, as well as unemployment (reference: health care workers) | -3.592      | 0.474          | -7.579 | <0.001* |
| poor and moderate economic status (reference: good and excellent)                                                                 | -0.669      | 0.325          | -2.057 | 0.040*  |
| >5 household members (reference: of 1-5)                                                                                          | -1.737      | 0.374          | -4.648 | <0.001* |

392

393 **Figures and tables legends:**

394 **Table 1.** Sociodemographic characteristics

395 **Table 2.** General Knowledge, Transmission, Signs and Symptoms, and Prevention around  
396 COVID-19 **Table 3.** Mean knowledge score of participants by demographic variables

397 **Table 4.** Multiple linear regression on variables associated with poor COVID-19 knowledge

398 **Figure 1.** Distribution of participants according to governorates and education level

399

400 **References:**

- 401 1. Huang C, Wang Y, Li X, et al. Clinical features of patients infected with 2019 novel coronavirus in  
402 Wuhan, China. *The Lancet* 2020;395(10223):497-506. doi: 10.1016/s0140-6736(20)30183-5
- 403 2. Viner RM, Ward JL, Hudson LD, et al. Systematic review of reviews of symptoms and signs of  
404 COVID-19 in children and adolescents. 2020
- 405 3. Rahman HS, Aziz MS, Hussein RH, et al. The transmission modes and sources of COVID-19: A  
406 systematic review. 2020
- 407 4. McKernan B. Syria confirms first Covid-19 case amid fears of catastrophic spread. *The Guardian*  
408 2020
- 409 5. Organization WH. Coronavirus disease 2019 (COVID-19): situation report, 106. 2020
- 410 6. Gharibah M, Mehchy Z. COVID-19 pandemic: Syria's response and healthcare capacity. 2020
- 411 7. Ajilore K, Atakiti I, Onyenankeya K. College students' knowledge, attitudes and adherence to  
412 public service announcements on Ebola in Nigeria: Suggestions for improving future Ebola  
413 prevention education programmes. *Health Education Journal* 2017;76(6):648-60.
- 414 8. Tachfouti N, Slama K, Berraho M, et al. The impact of knowledge and attitudes on adherence to  
415 tuberculosis treatment: a case-control study in a Moroccan region. *Pan African Medical*  
416 *Journal* 2012;12(1)
- 417 9. McNatt Z, Boothby NG, Al-Shannaq H, et al. Impact of Separation on Refugee Families: Syrian  
418 Refugees in Jordan. 2018
- 419 10. Syria anniversary press release. *United Nations Office for the Coordination of Humanitarian*  
420 *Affairs (OCHA)* 2020
- 421 11. UNICEF Syria Crisis Situation Report 2019
- 422 12. Zhong B-L, Luo W, Li H-M, et al. Knowledge, attitudes, and practices towards COVID-19 among  
423 Chinese residents during the rapid rise period of the COVID-19 outbreak: a quick online  
424 cross-sectional survey. *International Journal of Biological Sciences* 2020;16(10):1745.
- 425 13. Khader Y, Al Nsour M, Al-Batayneh OB, et al. Dentists' Awareness, Perception, and Attitude  
426 Regarding COVID-19 and Infection Control: Cross-Sectional Study Among Jordanian Dentists.  
427 *JMIR Public Health and Surveillance* 2020;6(2):e18798.
- 428 14. Qarawi A, Ng SJ, Gad A, et al. Awareness and Preparedness of Hospital Staff against Novel  
429 Coronavirus (COVID-2019): A Global Survey - Study Protocol. *SSRN Electronic Journal* 2020  
430 doi: 10.2139/ssrn.3550294
- 431 15. Austrian K, Pinchoff J, Tidwell JB, et al. COVID-19 related knowledge, attitudes, practices and  
432 needs of households in informal settlements in Nairobi, Kenya. 2020
- 433 16. Roy D, Tripathy S, Kar SK, et al. Study of knowledge, attitude, anxiety & perceived mental  
434 healthcare need in Indian population during COVID-19 pandemic. *Asian Journal of Psychiatry*  
435 2020:102083.
- 436 17. Hussain T, Khan S, Gilani U, et al. Evaluation of General Awareness Among Professionals  
437 Regarding COVID-19: A Survey Based Study from Pakistan. 2020

- 1  
2  
3 438 18. Zhou M, Tang F, Wang Y, et al. Knowledge, attitude and practice regarding COVID-19 among  
4 439 health care workers in Henan, China. *Journal of Hospital Infection* 2020  
5 440 19. Bhagavathula AS, Aldhaleei WA, Rahmani J, et al. Novel Coronavirus (COVID-19) Knowledge and  
6 441 Perceptions: A Survey on Healthcare workers. *medRxiv* 2020  
7 442 20. Organization WH. Coronavirus disease 2019 (COVID-19): situation report, 71. 2020  
8 443 21. Backer J, Klinkenberg D, Wallinga J. Incubation period of 2019 novel coronavirus (2019-nCoV)  
9 444 infections among travellers from Wuhan, China, 20–28 January 2020. *Eurosurveillance*  
10 445 2020;25 doi: 10.2807/1560-7917.ES.2020.25.5.2000062  
11 446 22. Plecher H. Age structure in Syria 2018. *Statista* 2020  
12 447 23. Vadivu TS, Annamuthu P. An Awareness and Perception of COVID-19 among General Public—A  
13 448 Cross Sectional Analysis. 2014  
14 449 24. Organization WH. Web World Health Organization—Diabetes country profiles: Diakses, 2016.  
15 450 25. Tailakh A, Evangelista LS, Menten JC, et al. Hypertension prevalence, awareness, and control in A  
16 451 rab countries: A systematic review. *Nursing & health sciences* 2014;16(1):126-30.  
17 452 26. The use of non-steroidal anti-inflammatory drugs (NSAIDs) in patients with COVID-19. *World*  
18 453 *Health Organization* 2020  
19 454 27. Practical considerations and recommendations for religious leaders and faith-based communities  
20 455 in the context of COVID-19. *World Health Organization* 2020  
21 456 28. Safe Ramadan practices in the context of the COVID-19 *World Health Organization* 2020  
22 457 29. Surveillances V. The epidemiological characteristics of an outbreak of 2019 novel coronavirus  
23 458 diseases (COVID-19)—China, 2020. *China CDC Weekly* 2020;2(8):113-22.  
24 459 30. Organization WH. Getting your workplace ready for COVID-19: How COVID-19 spreads, 19 March  
25 460 2020: World Health Organization, 2020.  
26 461 31. Best M, Neuhauser D. Ignaz Semmelweis and the birth of infection control. *Quality & safety in*  
27 462 *health care* 2004;13:233-4. doi: 10.1136/qhc.13.3.233  
28 463 32. Rabie T, Curtis V. Handwashing and Risk of Respiratory Infections: A Quantitative Systematic  
29 464 Review. *Tropical medicine & international health : TM & IH* 2006;11:258-67. doi:  
30 465 10.1111/j.1365-3156.2006.01568.x  
31 466 33. Jefferson T, Foxlee R, Del Mar C, et al. Physical interventions to interrupt or reduce the spread of  
32 467 respiratory viruses: systematic review. *Bmj* 2008;336(7635):77-80.

468



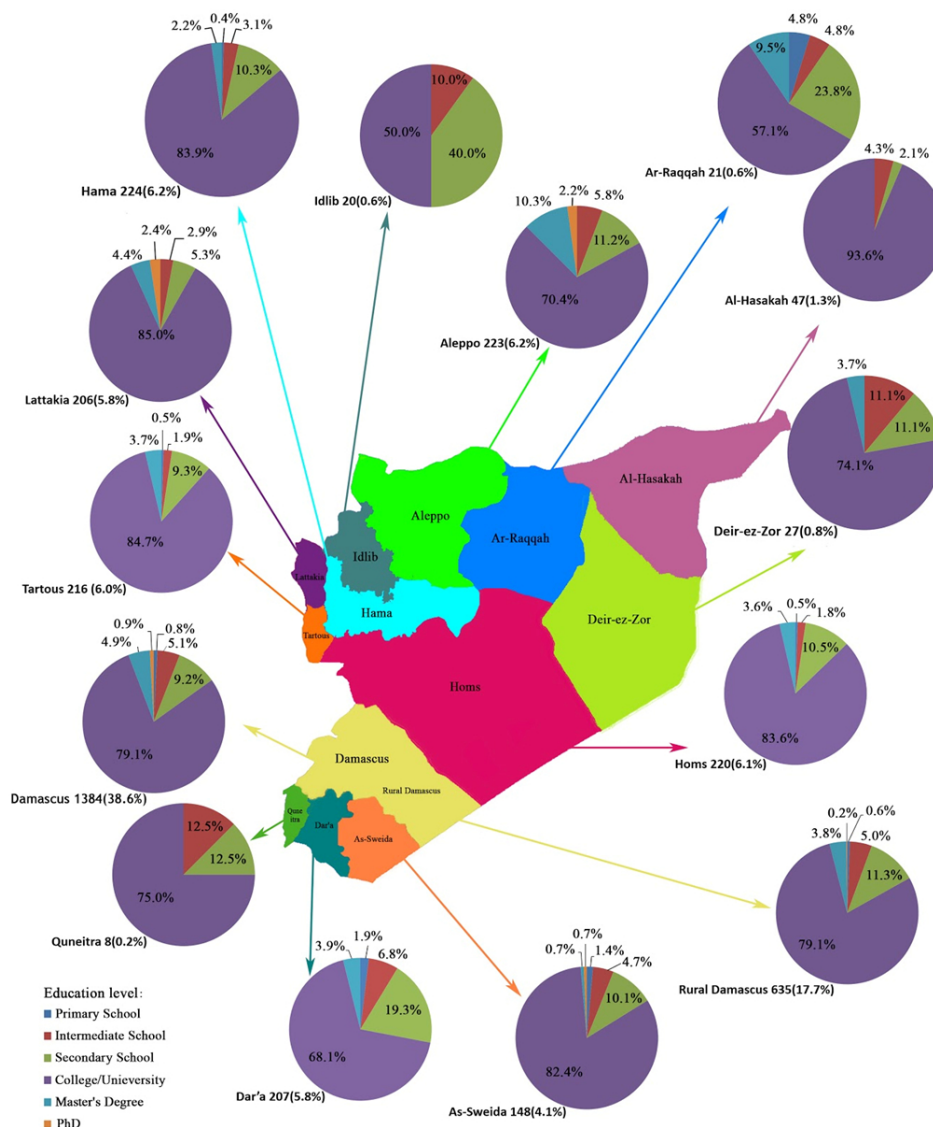

Figure 1. Distribution of participants according to governorates and education level

## Attached Survey:

## Appendix 1

| Socio-demographic Characteristics                                                                                                                                                                                                                                                                           |                                                                                                                                                                                                                                                                                                                                                                                                                                                                                                 |
|-------------------------------------------------------------------------------------------------------------------------------------------------------------------------------------------------------------------------------------------------------------------------------------------------------------|-------------------------------------------------------------------------------------------------------------------------------------------------------------------------------------------------------------------------------------------------------------------------------------------------------------------------------------------------------------------------------------------------------------------------------------------------------------------------------------------------|
| <b>Age (years):</b><br><input type="checkbox"/> Below 15 <input type="checkbox"/> 15-20 <input type="checkbox"/> 20-30 <input type="checkbox"/> 30-50<br><input type="checkbox"/> 40-50 <input type="checkbox"/> 50-60 <input type="checkbox"/> 60-70<br><input type="checkbox"/> Above 70                  | <b>Gender:</b><br><input type="checkbox"/> Male<br><input type="checkbox"/> Female                                                                                                                                                                                                                                                                                                                                                                                                              |
| <b>Marital status:</b><br><input type="checkbox"/> Single <input type="checkbox"/> Relationship <input type="checkbox"/> Married<br><input type="checkbox"/> Divorced <input type="checkbox"/> Widowed                                                                                                      | <b>Educational level:</b><br><input type="checkbox"/> Primary school <input type="checkbox"/> Intermediate school<br><input type="checkbox"/> Secondary school <input type="checkbox"/> University/College<br><input type="checkbox"/> Master's Degree <input type="checkbox"/> PHD Degree                                                                                                                                                                                                      |
| <b>Occupation:</b><br><input type="checkbox"/> Health care worker <input type="checkbox"/> Government<br>institution <input type="checkbox"/> Private institution <input type="checkbox"/> Business<br><input type="checkbox"/> Military <input type="checkbox"/> Unemployed <input type="checkbox"/> Other | <b>Residence:</b><br><input type="checkbox"/> Damascus/Rural Damascus <input type="checkbox"/> Hama<br><input type="checkbox"/> Aleppo <input type="checkbox"/> Homs <input type="checkbox"/> Tartous<br><input type="checkbox"/> Lattakia <input type="checkbox"/> Dar'a <input type="checkbox"/> As-Sweida<br><input type="checkbox"/> Al Hasakah <input type="checkbox"/> Deir-ez-Zor <input type="checkbox"/> Idlib<br><input type="checkbox"/> Ar-Raqqah <input type="checkbox"/> Quneitra |
| <b>Area:</b><br><input type="checkbox"/> Rural <input type="checkbox"/> Urban                                                                                                                                                                                                                               | <b>Economic Status:</b><br><input type="checkbox"/> Excellent <input type="checkbox"/> Good<br><input type="checkbox"/> Moderate <input type="checkbox"/> Poor                                                                                                                                                                                                                                                                                                                                  |
| <b>Do you smoke?</b><br><input type="checkbox"/> Yes <input type="checkbox"/> No                                                                                                                                                                                                                            | <b>Do you drink alcohol?</b><br><input type="checkbox"/> Yes <input type="checkbox"/> No                                                                                                                                                                                                                                                                                                                                                                                                        |
| <b>How many people do you live with?</b><br><input type="checkbox"/> Alone <input type="checkbox"/> 1-5 <input type="checkbox"/> 6-10 <input type="checkbox"/> 11-15 <input type="checkbox"/> 16-20 <input type="checkbox"/> Above 20                                                                       |                                                                                                                                                                                                                                                                                                                                                                                                                                                                                                 |
|                                                                                                                                                                                                                                                                                                             |                                                                                                                                                                                                                                                                                                                                                                                                                                                                                                 |
| <b>Do you share toiletries/personal care products with others?</b><br><input type="checkbox"/> Yes <input type="checkbox"/> No                                                                                                                                                                              |                                                                                                                                                                                                                                                                                                                                                                                                                                                                                                 |
| <b>Do you know anyone infected with COVID-19?</b><br><input type="checkbox"/> Yes <input type="checkbox"/> No                                                                                                                                                                                               |                                                                                                                                                                                                                                                                                                                                                                                                                                                                                                 |

**Table 2. General Knowledge about COVID-19**

|                                                                                                                                                                               |  |                                    |  |                                                                                                             |  |                                            |  |                    |  |
|-------------------------------------------------------------------------------------------------------------------------------------------------------------------------------|--|------------------------------------|--|-------------------------------------------------------------------------------------------------------------|--|--------------------------------------------|--|--------------------|--|
| <b>What is COVID-19?</b>                                                                                                                                                      |  |                                    |  | <b>Do you know how long after being infected with COVID-19 can a person suffer from signs and symptoms?</b> |  |                                            |  |                    |  |
| <input type="checkbox"/> Virus                                                                                                                                                |  | <input type="checkbox"/> Bacteria  |  | <input type="checkbox"/> 1 Minute to 1 Hour                                                                 |  | <input type="checkbox"/> 1 Hour to 2 Days  |  |                    |  |
| <input type="checkbox"/> Parasite                                                                                                                                             |  | <input type="checkbox"/> Fungus    |  | <input type="checkbox"/> 2 Days to 2 weeks                                                                  |  | <input type="checkbox"/> 2 Weeks to 1Month |  |                    |  |
| <input type="checkbox"/> Immunodeficiency                                                                                                                                     |  | <input type="checkbox"/> Inherited |  | <input type="checkbox"/> Over a 1 month                                                                     |  |                                            |  |                    |  |
| <input type="checkbox"/> Do not know                                                                                                                                          |  |                                    |  |                                                                                                             |  |                                            |  |                    |  |
| <b>Can an infection with COVID-19 confer permanent immunity (once infected with COVID-19 you cannot contract another infection)?</b>                                          |  |                                    |  |                                                                                                             |  |                                            |  |                    |  |
| <input type="checkbox"/> Yes                                                                                                                                                  |  | <input type="checkbox"/> No        |  | <input type="checkbox"/> Do not know                                                                        |  |                                            |  |                    |  |
| <b>Can COVID-19 cause severe illness and lead to death in elderly, chronically ill (hypertension, diabetes, asthma . . .), and those who have compromised immune systems?</b> |  |                                    |  |                                                                                                             |  |                                            |  |                    |  |
| <input type="checkbox"/> Yes                                                                                                                                                  |  | <input type="checkbox"/> No        |  | <input type="checkbox"/> Do not know                                                                        |  |                                            |  |                    |  |
| <b>Can COVID-19 cause infertility?</b>                                                                                                                                        |  |                                    |  |                                                                                                             |  |                                            |  |                    |  |
| <input type="checkbox"/> Yes                                                                                                                                                  |  | <input type="checkbox"/> No        |  | <input type="checkbox"/> Do not know                                                                        |  |                                            |  |                    |  |
| <b>Is COVID-19 teratogenic (i.e. cause malformations/abnormalities to an embryo/fetus)?</b>                                                                                   |  |                                    |  |                                                                                                             |  |                                            |  |                    |  |
| <input type="checkbox"/> Yes                                                                                                                                                  |  | <input type="checkbox"/> No        |  | <input type="checkbox"/> Do not know                                                                        |  |                                            |  |                    |  |
| <b>Treatment for COVID-19</b>                                                                                                                                                 |  |                                    |  |                                                                                                             |  |                                            |  |                    |  |
|                                                                                                                                                                               |  |                                    |  | <b>Yes</b>                                                                                                  |  | <b>No</b>                                  |  | <b>Do Not Know</b> |  |
| <b>No treatment available</b>                                                                                                                                                 |  |                                    |  |                                                                                                             |  |                                            |  |                    |  |
| <b>Antibiotics</b>                                                                                                                                                            |  |                                    |  |                                                                                                             |  |                                            |  |                    |  |
| <b>Ibuprofen</b>                                                                                                                                                              |  |                                    |  |                                                                                                             |  |                                            |  |                    |  |
| <b>Is there an available vaccine for COVID-19?</b>                                                                                                                            |  |                                    |  |                                                                                                             |  |                                            |  |                    |  |
| <input type="checkbox"/> Yes                                                                                                                                                  |  | <input type="checkbox"/> No        |  | <input type="checkbox"/> Do not know                                                                        |  |                                            |  |                    |  |

**Table 3. Transmission Pathways**

|                                                                                                      | Yes | No | Do Not Know |
|------------------------------------------------------------------------------------------------------|-----|----|-------------|
| Can COVID-19 be transmitted via respiratory droplets (coughing or sneezing) of infected individuals? |     |    |             |
| Can COVID-19 be transmitted after shaking-hands with an infected individual?                         |     |    |             |
| Can COVID-19 be transmitted after touching an infected individual's personal belongings?             |     |    |             |
| Can COVID-19 be transmitted from animals to humans?                                                  |     |    |             |
| Can COVID-19 be transmitted via undercooked food?                                                    |     |    |             |
| Can COVID-19 be transmitted via sexual contact?                                                      |     |    |             |
| Can COVID-19 be transmitted via vertical transmission (mother to fetus)?                             |     |    |             |

**Table 4. Signs and Symptoms of COVID-19**

|                                                                            | True | False | Do Not Know |
|----------------------------------------------------------------------------|------|-------|-------------|
| Is fever/temperature among the signs and symptoms of COVID-19?             |      |       |             |
| Is sneezing among the signs and symptoms of COVID-19?                      |      |       |             |
| Is sore throat among the signs and symptoms of COVID-19?                   |      |       |             |
| Is headache among the signs and symptoms of COVID-19?                      |      |       |             |
| Is Chest pain among the signs and symptoms of COVID-19?                    |      |       |             |
| Is body aches (generalized pain) among the signs and symptoms of COVID-19? |      |       |             |
| Is fatigue among the signs and symptoms of COVID-19?                       |      |       |             |
| Is diarrhea among the signs and symptoms of COVID-19?                      |      |       |             |
| Is a runny nose among the signs and symptoms of COVID-19?                  |      |       |             |
| Is dry cough among the signs and symptoms of COVID-19?                     |      |       |             |
| Is productive cough among the signs and symptoms of COVID-19?              |      |       |             |
| Is bleeding among the signs and symptoms of COVID-19?                      |      |       |             |
| Can a person be infected with COVID-19 and have no signs and symptoms?     |      |       |             |

**Table 5. Prevention Methods**

|                                                                                                                                                                                                                                                                                                                                                                                                                                       | True | False | Do Not Know |
|---------------------------------------------------------------------------------------------------------------------------------------------------------------------------------------------------------------------------------------------------------------------------------------------------------------------------------------------------------------------------------------------------------------------------------------|------|-------|-------------|
| Does wearing a face mask outside the home offer protection from Covid-19?                                                                                                                                                                                                                                                                                                                                                             |      |       |             |
| Does washing hands with soap and water offer protection from COVID-19?                                                                                                                                                                                                                                                                                                                                                                |      |       |             |
| Do avoiding crowded places offer protection from Covid-19?                                                                                                                                                                                                                                                                                                                                                                            |      |       |             |
| Does the flu vaccine offer protection from Covid-19?                                                                                                                                                                                                                                                                                                                                                                                  |      |       |             |
| Does staying at home offer protection from Covid-19?                                                                                                                                                                                                                                                                                                                                                                                  |      |       |             |
| Does using hand sanitizer offer protection from Covid-19?                                                                                                                                                                                                                                                                                                                                                                             |      |       |             |
| Does using bleach to clean household surfaces prevent COVID-19 infection?                                                                                                                                                                                                                                                                                                                                                             |      |       |             |
| Does cleaning surfaces with a mixture of Flash and bleach offer protection from Covid-19?                                                                                                                                                                                                                                                                                                                                             |      |       |             |
| Does the quarantine of symptomatic individuals protect others from Covid-19?                                                                                                                                                                                                                                                                                                                                                          |      |       |             |
| Do cumin, anise, and mint offer protection from Covid-19?                                                                                                                                                                                                                                                                                                                                                                             |      |       |             |
| <b>What is your main source of information about COVID-19? (You may choose more than one option)</b><br><input type="checkbox"/> Internet (social media platforms)<br><input type="checkbox"/> Internet (Official websites like world health organization)<br><input type="checkbox"/> TV/Radio<br><input type="checkbox"/> Friends/Member of family<br><input type="checkbox"/> Magazines/Books<br><input type="checkbox"/> Lectures |      |       |             |
| <b>If you had new information about COVID-19 would you share it with friends and family to raise awareness?</b><br><input type="checkbox"/> Yes <input type="checkbox"/> No                                                                                                                                                                                                                                                           |      |       |             |

## STROBE Statement—checklist of items that should be included in reports of observational studies

|                           | Item No | Recommendation                                                                                                                                                                             | Page No.                         |
|---------------------------|---------|--------------------------------------------------------------------------------------------------------------------------------------------------------------------------------------------|----------------------------------|
| <b>Title and abstract</b> | 1       | (a) Indicate the study's design with a commonly used term in the title or the abstract                                                                                                     | 1                                |
|                           |         | (b) Provide in the abstract an informative and balanced summary of what was done and what was found                                                                                        | 2,3                              |
| <b>Introduction</b>       |         |                                                                                                                                                                                            |                                  |
| Background/rationale      | 2       | Explain the scientific background and rationale for the investigation being reported                                                                                                       | 5,6                              |
| Objectives                | 3       | State specific objectives, including any prespecified hypotheses                                                                                                                           | 6                                |
| <b>Methods</b>            |         |                                                                                                                                                                                            |                                  |
| Study design              | 4       | Present key elements of study design early in the paper                                                                                                                                    | 6,7                              |
| Setting                   | 5       | Describe the setting, locations, and relevant dates, including periods of recruitment, exposure, follow-up, and data collection                                                            | 6,7                              |
| Participants              | 6       | (a) <i>Cohort study</i> —Give the eligibility criteria, and the sources and methods of selection of participants. Describe methods of follow-up                                            | 6,7                              |
|                           |         | <i>Case-control study</i> —Give the eligibility criteria, and the sources and methods of case ascertainment and control selection. Give the rationale for the choice of cases and controls |                                  |
|                           |         | <i>Cross-sectional study</i> —Give the eligibility criteria, and the sources and methods of selection of participants                                                                      |                                  |
|                           |         | (b) <i>Cohort study</i> —For matched studies, give matching criteria and number of exposed and unexposed                                                                                   | Not applicable                   |
|                           |         | <i>Case-control study</i> —For matched studies, give matching criteria and the number of controls per case                                                                                 |                                  |
| Variables                 | 7       | Clearly define all outcomes, exposures, predictors, potential confounders, and effect modifiers. Give diagnostic criteria, if applicable                                                   | -                                |
| Data sources/measurement  | 8*      | For each variable of interest, give sources of data and details of methods of assessment (measurement). Describe comparability of assessment methods if there is more than one group       | Not applicable                   |
| Bias                      | 9       | Describe any efforts to address potential sources of bias                                                                                                                                  | 7                                |
| Study size                | 10      | Explain how the study size was arrived at                                                                                                                                                  | 7                                |
| Quantitative variables    | 11      | Explain how quantitative variables were handled in the analyses. If applicable, describe which groupings were chosen and why                                                               | 8                                |
| Statistical methods       | 12      | (a) Describe all statistical methods, including those used to control for confounding                                                                                                      | 8                                |
|                           |         | (b) Describe any methods used to examine subgroups and interactions                                                                                                                        | 8                                |
|                           |         | (c) Explain how missing data were addressed                                                                                                                                                | Not applicable (no missing data) |
|                           |         | (d) <i>Cohort study</i> —If applicable, explain how loss to follow-up                                                                                                                      | 8                                |

1  
2  
3  
4  
5  
6  
7  
8  
9  
10  
11  
12  
13  
14  
15  
16  
17  
18  
19  
20  
21  
22  
23  
24  
25  
26  
27  
28  
29  
30  
31  
32  
33  
34  
35  
36  
37  
38  
39  
40  
41  
42  
43  
44  
45  
46  
47  
48  
49  
50  
51  
52  
53  
54  
55  
56  
57  
58  
59  
60

was addressed

*Case-control study*—If applicable, explain how matching of cases and controls was addressed

*Cross-sectional study*—If applicable, describe analytical methods taking account of sampling strategy

---

€ Describe any sensitivity analyses

-

Continued on next page

For peer review only



| <b>Results</b>           |     |                                                                                                                                                                                                              | <b>Page No.</b> |
|--------------------------|-----|--------------------------------------------------------------------------------------------------------------------------------------------------------------------------------------------------------------|-----------------|
| Participants             | 13* | (a) Report numbers of individuals at each stage of study—eg numbers potentially eligible, examined for eligibility, confirmed eligible, included in the study, completing follow-up, and analysed            | 9               |
|                          |     | (b) Give reasons for non-participation at each stage                                                                                                                                                         | -               |
|                          |     | (c) Consider use of a flow diagram                                                                                                                                                                           | -               |
| Descriptive data         | 14* | (a) Give characteristics of study participants (eg demographic, clinical, social) and information on exposures and potential confounders                                                                     | 9               |
|                          |     | (b) Indicate number of participants with missing data for each variable of interest                                                                                                                          | Not applicable  |
|                          |     | © <i>Cohort study</i> —Summarise follow-up time (eg, average and total amount)                                                                                                                               | Not applicable  |
| Outcome data             | 15* | <i>Cohort study</i> —Report numbers of outcome events or summary measures over time                                                                                                                          | -               |
|                          |     | <i>Case-control study</i> —Report numbers in each exposure category, or summary measures of exposure                                                                                                         | -               |
|                          |     | <i>Cross-sectional study</i> —Report numbers of outcome events or summary measures                                                                                                                           | 29-35           |
| Main results             | 16  | (a) Give unadjusted estimates and, if applicable, confounder-adjusted estimates and their precision (eg, 95% confidence interval). Make clear which confounders were adjusted for and why they were included | 34,35           |
|                          |     | (b) Report category boundaries when continuous variables were categorized                                                                                                                                    | 29-33           |
|                          |     | (c) If relevant, consider translating estimates of relative risk into absolute risk for a meaningful time period                                                                                             | Not applicable  |
| Other analyses           | 17  | Report other analyses done—eg analyses of subgroups and interactions, and sensitivity analyses                                                                                                               |                 |
| <b>Discussion</b>        |     |                                                                                                                                                                                                              |                 |
| Key results              | 18  | Summarise key results with reference to study objectives                                                                                                                                                     | 13-15           |
| Limitations              | 19  | Discuss limitations of the study, taking into account sources of potential bias or imprecision. Discuss both direction and magnitude of any potential bias                                                   | 16              |
| Interpretation           | 20  | Give a cautious overall interpretation of results considering objectives, limitations, multiplicity of analyses, results from similar studies, and other relevant evidence                                   | 17              |
| Generalisability         | 21  | Discuss the generalisability (external validity) of the study results                                                                                                                                        | 16              |
| <b>Other information</b> |     |                                                                                                                                                                                                              |                 |
| Funding                  | 22  | Give the source of funding and the role of the funders for the present study and, if applicable, for the original study on which the present article is based                                                | 17              |

\*Give information separately for cases and controls in case-control studies and, if applicable, for exposed and unexposed groups in cohort and cross-sectional studies.

**Note:** An Explanation and Elaboration article discusses each checklist item and gives methodological background and published examples of transparent reporting. The STROBE checklist is best used in conjunction with this article (freely available on the Web sites of PLoS Medicine at <http://www.plosmedicine.org/>, Annals of Internal Medicine at <http://www.annals.org/>, and Epidemiology at <http://www.epidem.com/>). Information on the STROBE Initiative is available at [www.strobe-statement.org](http://www.strobe-statement.org).

# BMJ Open

## A Crisis Within a Crisis: COVID-19 Knowledge and Awareness among the Syrian Population - a cross-sectional study

|                                 |                                                                                                                                                                                                                                                                                                   |
|---------------------------------|---------------------------------------------------------------------------------------------------------------------------------------------------------------------------------------------------------------------------------------------------------------------------------------------------|
| Journal:                        | <i>BMJ Open</i>                                                                                                                                                                                                                                                                                   |
| Manuscript ID                   | bmjopen-2020-043305.R2                                                                                                                                                                                                                                                                            |
| Article Type:                   | Original research                                                                                                                                                                                                                                                                                 |
| Date Submitted by the Author:   | 15-Mar-2021                                                                                                                                                                                                                                                                                       |
| Complete List of Authors:       | Mohsen, Fatema; Syrian Private University Faculty of Medicine, Bakkar, Batoul; Syrian Private University Faculty of Medicine Armashi, Humam; Syrian Private University Faculty of Medicine Aldaher, Nizar; Syrian Private University Faculty of Medicine; Damascus University Faculty of Medicine |
| <b>Primary Subject Heading</b>: | Public health                                                                                                                                                                                                                                                                                     |
| Secondary Subject Heading:      | Public health, Infectious diseases                                                                                                                                                                                                                                                                |
| Keywords:                       | Public health < INFECTIOUS DISEASES, PUBLIC HEALTH, COVID-19                                                                                                                                                                                                                                      |
|                                 |                                                                                                                                                                                                                                                                                                   |

SCHOLARONE™  
Manuscripts



I, the Submitting Author has the right to grant and does grant on behalf of all authors of the Work (as defined in the below author licence), an exclusive licence and/or a non-exclusive licence for contributions from authors who are: i) UK Crown employees; ii) where BMJ has agreed a CC-BY licence shall apply, and/or iii) in accordance with the terms applicable for US Federal Government officers or employees acting as part of their official duties; on a worldwide, perpetual, irrevocable, royalty-free basis to BMJ Publishing Group Ltd ("BMJ") its licensees and where the relevant Journal is co-owned by BMJ to the co-owners of the Journal, to publish the Work in this journal and any other BMJ products and to exploit all rights, as set out in our [licence](#).

The Submitting Author accepts and understands that any supply made under these terms is made by BMJ to the Submitting Author unless you are acting as an employee on behalf of your employer or a postgraduate student of an affiliated institution which is paying any applicable article publishing charge ("APC") for Open Access articles. Where the Submitting Author wishes to make the Work available on an Open Access basis (and intends to pay the relevant APC), the terms of reuse of such Open Access shall be governed by a Creative Commons licence – details of these licences and which [Creative Commons](#) licence will apply to this Work are set out in our licence referred to above.

Other than as permitted in any relevant BMJ Author's Self Archiving Policies, I confirm this Work has not been accepted for publication elsewhere, is not being considered for publication elsewhere and does not duplicate material already published. I confirm all authors consent to publication of this Work and authorise the granting of this licence.

1  
2  
3  
4 1 **A Crisis Within a Crisis: COVID-19 Knowledge and Awareness among the**  
5  
6 2 **Syrian Population - a cross-sectional study**  
7  
8  
9

10 3  
11  
12 4 **Authors: Fatema Mohsen<sup>1</sup>, Batoul Bakkar<sup>1</sup>, Humam Armashi<sup>1</sup>, Nizar Aldaher<sup>2,3</sup>**  
13  
14 5  
15  
16

17 6 **Affiliations:**

18  
19  
20  
21 7 1Faculty of Medicine, Syrian Private University, Damascus, Syria.  
22

23 8 2Professor in Infectious Diseases, Department of Internal Medicine, Faculty of Medicine,  
24  
25  
26 9 Damascus University, Damascus, Syria.  
27

28 10 3Professor in Infectious Diseases, Department of Internal Medicine, Faculty of Medicine,  
29  
30  
31 11 Syrian Private University, Rif Dimashq, Syria.  
32

33 12  
34  
35  
36 13 **Corresponding Author:**

37 14 Fatema Mohsen

38  
39  
40  
41  
42 15 Faculty of Medicine, Syrian Private University, Mazzeh Street, P.O. Box 36822, Damascus,  
43

44 16 Syrian Arab republic  
45

46  
47 17 Tel:00963936396590 Email: fatemamohsena@gmail.com  
48  
49

50 18  
51  
52  
53 19 **Abstract:**  
54  
55  
56  
57  
58  
59  
60

1  
2  
3 20 **Objectives:** To gauge specific knowledge around clinical features, transmission pathways, and  
4  
5 21 prevention methods, and to identify factors associated with poor knowledge to help facilitate  
6  
7 22 outbreak management in Syria during this rapid global rise of the COVID-19 pandemic.  
8  
9

10 23 **Design:** Web-based cross-sectional survey.  
11  
12

13 24 **Setting:** This study was conducted in March 2020, nearly 10 years into the Syrian war crisis.  
14  
15 25 The Arabic-language survey was posted on various social media platforms including  
16  
17 26 WhatsApp, Telegram, Instagram, and Facebook targeting various social groups.  
18  
19

20  
21 27 **Participants:** A total of 4495 participants completed the survey. Participants with a history of  
22  
23 28 COVID-19 infection, residing outside Syria, or who did not fully complete the survey were  
24  
25 29 excluded from the study. The final sample of 3586 participants (completion rate=79.8%)  
26  
27 30 consisted of 2444(68.2%) females and 1142(31.8%) males.  
28  
29

30 31 **Primary and secondary outcome measures:** The first, knowledge of COVID-19 in 4 areas  
31  
32 32 (1. general knowledge 2. transmission pathways 3. signs and symptoms 4. prevention  
33  
34 33 methods). The second, factors associated with poor knowledge.  
35  
36

37  
38 34 **Results:** Of the 3586 participants, 2444(68.2%) were female, 1822(50.8%) were unemployed,  
39  
40 35 and 2839(79.2%) were college-educated. The study revealed good awareness regarding  
41  
42 36 COVID-19 (mean 75.6%, SD±9.4%). Multiple linear regression analysis correlated poor mean  
43  
44 37 knowledge scores with male gender ( $\beta=-0.933$ ,  $p=0.005$ ), secondary school or lower education  
45  
46 38 level ( $\beta=-3.782$ ,  $p<0.001$ ), non-healthcare occupation ( $\beta=-3.592$ ,  $p<0.001$ ), low economic  
47  
48 39 status ( $\beta=-0.669$ ,  $p<0.040$ ), and >5 household members ( $\beta=-1.737$ ,  $p<0.001$ ).  
49  
50  
51  
52  
53  
54  
55  
56  
57  
58  
59  
60

1  
2  
3  
4 41 **Conclusion:** This study revealed some potentially troubling knowledge gaps which underscore  
5  
6 42 the need for a vigorous public education campaign. This campaign must reinforce the public's  
7  
8 43 awareness, knowledge, and vigilance towards precautionary measures against COVID-19, and  
9  
10 44 most importantly aid in controlling the worldwide spread of the disease.  
11

12 45

13  
14  
15 46 **Strengths and limitations of this study:**

16  
17 47 . Data are derived from a large, national survey across Syria, during the lockdown period.  
18

19  
20 48 . The survey covered socio-demographic information, general knowledge, transmission,  
21  
22 49 symptoms, and prevention.  
23

24  
25  
26 50 . Results have broad implications for public health programming and response to COVID-19  
27  
28 51 in Syria.  
29

30  
31  
32 52 . This web-based cross-sectional study cannot be generalized towards the Syrian population.  
33

34 53

35  
36  
37 54 **Keywords:** Awareness; Knowledge; COVID-19; Pandemic; Syria; War; Population.  
38

39 55

40  
41  
42  
43  
44 56 **Background:**

45  
46  
47  
48 57 Coronavirus disease 2019 (COVID-19) is a highly infectious respiratory disease that  
49  
50 58 evolved into a worldwide pandemic threatening a prolonged economic recession. The first  
51  
52 59 incidence was reported at a local seafood market in Wuhan, China.<sup>1</sup> The virus continues to  
53  
54 60 spread, with steadily increasing morbidity and mortality cases, hitting the poorest and most  
55  
56 61 vulnerable in the world. Many studies have assessed symptom clusters, transmission pathways,  
57  
58  
59 62 and prevention methods; however, many aspects have yet to be studied.<sup>2 3</sup> Sexual

1  
2  
3 63 transmissions, horizontal transmission, animal to human transmission, permanent immunity,  
4  
5 64 and fetal abnormalities as a result of maternal infection are as yet unproven.  
6  
7

8 65 The battle against COVID-19 in Syria has just entered its third wave. The first  
9  
10 66 confirmed case was announced on 22 March 2020,<sup>4</sup> and there had only been 44 cases and 3  
11  
12 67 deaths at the time of the study. These figures are significantly lower than neighbouring  
13  
14 68 countries such as Turkey (127,659 and 3,461), Iran (98,647 and 6,277), Iraq (2,346 and 98),  
15  
16 69 Lebanon (740 and 25), and Jordan (465 and 9).<sup>5</sup> The Syrian healthcare system is severely  
17  
18 70 under-equipped and lacks the capacity to contain such a crisis. The estimated number of  
19  
20 71 intensive care unit (ICU) beds with ventilators is a mere 325, and the theoretical maximum  
21  
22 72 number of cases that can be adequately treated is only 6,500.<sup>6</sup> Once this maximum threshold  
23  
24 73 capacity is exceeded, drastic rationing decisions will have to be made. Therefore, cooperation  
25  
26 74 with and response to guidance from the WHO are of utmost importance. Unprecedented  
27  
28 75 measures have been adopted to control the spread of COVID-19 in Syria.<sup>6</sup> The public's  
29  
30 76 adherence to these control measures is largely affected by their awareness, knowledge, and  
31  
32 77 attitudes towards disease and outbreaks.<sup>7 8</sup>  
33  
34  
35  
36

37 78 The Syrian conflict, now in its 10<sup>th</sup> year, has resulted in the worst refugee crisis since  
38  
39 79 World War II.<sup>9</sup> The devastating impact of war has placed the public health system under  
40  
41 80 constant strain; the numbers of casualties continue to rise, 70% of health care workers (HCW)  
42  
43 81 have fled the country, the annihilation of healthcare facilities, and the “weaponization” of  
44  
45 82 healthcare are ongoing challenges.<sup>6 10</sup> These challenges along with dense residential areas, the  
46  
47 83 growing prevalence of chronic illness, and 83% of the population living under the poverty line  
48  
49 84 make Syria highly vulnerable to a severe outbreak.<sup>6 11</sup>  
50  
51  
52  
53

54 85 While some studies have been conducted to assess the knowledge, attitude, and  
55  
56 86 practices among populations during this pandemic, including one done in China, none have  
57  
58 87 done so in Syria.<sup>12-19</sup> To our knowledge this first study that aims to measure the awareness and  
59  
60

1  
2  
3 88 general knowledge of COVID-19 among the Syrian population at a time where ambiguity and  
4  
5 89 misinformation are rampant. The objective of this study is to gauge specific knowledge around  
6  
7 90 clinical features, transmission pathways, and prevention methods, and to identify factors  
8  
9 91 associated with poor knowledge to help facilitate outbreak management in Syria during this  
10  
11 92 rapid global rise of the COVID-19 pandemic. The information gleaned from this research will  
12  
13 93 help with public health programming and response to COVID-19 in Syria as the pandemic  
14  
15 94 continues to unfold.  
16  
17  
18  
19  
20  
21  
22

## 23 96 **Methods:**

### 24 25 26 97 **Study design, setting, and participants:**

27  
28  
29 98 This web-based cross-sectional survey was conducted between March 31<sup>st</sup> and April 4<sup>th</sup>  
30  
31 99 of 2020, during the lockdown period. Ethical approval was obtained from the Institutional  
32  
33 100 Review Board (IRB) of the Faculty of Medicine, Syrian Private University. The inclusion  
34  
35 101 criteria for this study were participants residing in Syria who completed the survey and had no  
36  
37 102 known history of COVID-19 infection. The authors designed questions that were modelled  
38  
39 103 after existing awareness surveys, WHO course materials, technical briefs, and question and  
40  
41 104 answer bank on COVID-19 related topics.<sup>12 13 20-23</sup> Questions from existing awareness surveys  
42  
43 105 that did not target community awareness regarding COVID-19 were excluded from the study.  
44  
45  
46 106 <sup>12 13</sup> The survey was translated to Arabic and was reviewed by two dialectologists and two  
47  
48 107 infectious disease specialists, who evaluated whether the survey questions effectively assessed  
49  
50 108 COVID-19 knowledge, and checked for double-barrelled and confusing questions, to ascertain  
51  
52 109 the validity. We conducted a pilot study on 20 volunteers to assess reliability clarity, relevance,  
53  
54 110 and the acceptability of the survey. These volunteers were excluded from the final sample to  
55  
56 111 avoid bias. Modifications were made based on feedback received to facilitate better  
57  
58  
59  
60



1  
2  
3 112 comprehension before distributing the final survey to the general population. The Arabic-  
4  
5 113 language survey was posted on various social media platforms including WhatsApp, Telegram,  
6  
7 114 Instagram, and Facebook targeting various social groups. To avoid non-response bias the  
8  
9 115 survey was distributed during lockdown where the majority of the population were out of work  
10  
11 116 and at home, GIFs and posts were adapted to appeal to each social group, the questions were  
12  
13 117 made short and in the form of multiple choice questions that required no typing, and the ability  
14  
15 118 for viewers to comment on the link increased the popularity of the survey. Participants  
16  
17 119 confirmed their voluntary participation by answering a yes-no question, were informed of the  
18  
19 120 option to opt-out of the survey at any time, and were assured of the confidentiality and  
20  
21 121 anonymity of their responses. After confirmation, participants were directed to the first part of  
22  
23 122 the survey to complete questions about socio-demographic information including, age, gender,  
24  
25 123 residence, education level, occupation, and economic status. Participants under the age of 18  
26  
27 124 required informed parental consent, as well as submission of parent/guardian contact  
28  
29 125 information. The researchers were responsible for contacting the parents/guardians to obtain  
30  
31 126 consent before the child was given access to the survey. The sample size calculated was 2401  
32  
33 127 participants based on a margin of error of 2%, and a confidence interval of 95%, for a  
34  
35 128 population of 18,284,423 people using a sample size calculator (website:  
36  
37 129 <https://www.surveysystem.com/sscalc.htm>). The self-administered survey contained 40  
38  
39 130 questions divided into 4 sections: general knowledge (10 questions), transmission pathways (7  
40  
41 131 questions), clinical features (12 questions), and prevention methods (11 questions). The survey  
42  
43 132 is available in appendix 1.  
44  
45  
46  
47  
48  
49  
50  
51

### 52 **Patient and public involvement:**

53  
54  
55  
56 134 The public were not involved in the study design, conduct of the study, or plans to disseminate  
57  
58 135 the results to study participants.  
59  
60

## 136 **Statistical analysis**

137 A scoring system was used to analyse the participants' knowledge: a score of "1" was  
138 given for a correct answer and a score of "0" was given for an incorrect answer. The correct  
139 answers to the survey were determined from previous surveys and available WHO resources.  
140 <sup>12 13 20-23</sup> The percentage score for mean knowledge was calculated as follows: sum of scores  
141 obtained/maximum scores that could be obtained  $\times$  100. Participants' total mean knowledge in  
142 all the subsections, and mean knowledge of each subsection were calculated. Data were  
143 analysed using the Statistical Package for Social Sciences version 25.0 (SPSS Inc., Chicago,  
144 IL, United States) and reported as frequencies and percentages (for categorical variables) or  
145 means and standard deviations (SD) (for continuous variables). The t-test was applied to  
146 compare mean knowledge scores against both genders, and 3 questions (knowing an infected  
147 individual, use of personal belongings, and dissemination of knowledge). The t-test was applied  
148 to compare mean knowledge scores against gender. One-way analysis of variance (ANOVA)  
149 was applied using f-test to compare mean knowledge scores against socio-demographic  
150 variables (age, social status, residence, education level, occupation, economic status, and  
151 number of household members), and source of information. Multivariable linear regression  
152 analysis using the socio-demographic variables as independent variables (categorical) and  
153 mean knowledge score as the outcome variable (continuous) was conducted to identify factors  
154 associated with knowledge. Factors were selected with a backward method and were analysed  
155 using the unstandardized coefficient ( $\beta$ ), and 95% confidence interval. P-values $<$ 0.05 were  
156 considered statistically significant.

157

## 158 **Results:**

### 159 **Socio-demographics characteristics:**

160 Of 4495 total participants who completed the survey, participants with a known history  
161 of COVID-19 infection, residing outside Syria, and who did not fully complete the survey were  
162 excluded. The final sample of 3586 participants (completion rate= 79.8%) consisted of  
163 2444(68.2%) females and 1142(31.8%) males. Participants aged >20 years were the majority  
164 1204(33.6%) while participants between 35 and 39 were the minority 186(5.2%). Participant  
165 ages ranged from 12-78 years with a mean of 30 ( $\pm 10$ ) years). 2279(63.6%) participants were  
166 single, 1822(50.8%) were unemployed, 1064(29.7%) were smokers, and 428(11.9%) were  
167 alcohol consumers (Table 1). The majority of participants were residents of Damascus/ Rural  
168 Damascus 2019(56.3%) and had attained college/university level education (Figure1).

### 169 **General Knowledge regarding COVID-19:**

170 Participants showed a good level of awareness regarding COVID-19 ( $75.6 \pm 9.4\%$ ). An  
171 adequate level of basic knowledge ( $67.0 \pm 18.9\%$ ) was found among participants, 3383(94.3%)  
172 knew that a virus was the causative agent of COVID-19; 2535(70.7%) correctly identified the  
173 incubation period as being between 2 days and 2 weeks. Only 1500(41.8%) believed that an  
174 infection with COVID-19 does not confer lifelong immunity. The majority of participants  
175 3489(97.3%) were aware that COVID-19 infection in high-risk groups can be fatal. There is  
176 currently insufficient evidence on whether infertility is a complication of COVID-19 infection;  
177 461(12.9%) participants believed that COVID-19 can cause infertility while 1903(53.0%) did  
178 not. 2986(83.3%), and 2597(72.4%) correctly answered that there are currently no available  
179 vaccine or treatments respectively; however, there were misconceptions about the efficacy of  
180 antibiotics and Ibuprofen as treatments, 1228(34.2%) and 1268(35.3%) respectively (Table 2).

## 181 **Transmission, and Signs and Symptoms regarding COVID-19:**

182 There was a fair level of awareness ( $70.7 \pm 16.9\%$ ) regarding COVID-19 transmission  
183 pathways. A high level of awareness was demonstrated regarding common transmission  
184 pathways: 3521(98.2%), 3387(94.4%), and 3330(92.9%) identified respiratory droplets,  
185 touching an infected person's personal belongings, and handshaking respectively. There is  
186 currently limited evidence on animal-to-human and sexual transmission; 703(19.6%) did not  
187 know if transmission occurs between animals and humans, while 899(25.1%) did not know if  
188 the virus is transmitted sexually (Table 2).

189 The data showed a good level of awareness ( $76.0 \pm 13.6\%$ ) regarding clinical features.  
190 When asked about the main clinical features, participants correctly identified, fever  
191 3563(99.4%), sore throat 3037(84.7%), headache 3186(88.8%), chest pain 3050(85.0%),  
192 general pain 3019(84.2%), fatigue 3405(95.0%), and dry cough 3466(96.7%), whereas only  
193 1972(55.0%) knew that diarrhea can be a symptom. Only 2221(61.9%) were aware that  
194 infected individuals may be asymptomatic (Table 2).

## 195 **Prevention Methods regarding COVID-19:**

196 The highest level of awareness was in the prevention section ( $88.8 \pm 10.2\%$ ). Washing  
197 hands with soap, avoiding crowded areas, remaining at home, and wearing a face mask outside  
198 are the principal preventative measures against COVID-19, 3574(99.7%), 3574(99.75%),  
199 3554(99.1%), and 3204(89.3%), respectively. A minority of 158(4.4%) believed that cleaning  
200 with a mixture of Flash and bleach is a sound preventive measure. Only 2482(69.2%) knew  
201 that the flu vaccine offers no protection against COVID-19 (Table 2).

## 202 **Statistical Analysis of the Data:**

203 A series of one way ANOVA analyses revealed that mean knowledge differed  
204 significantly across: gender (p-value=0.009), age (p-value=0.003), social status (p-

1  
2  
3 205 value=0.042), education level (p-value<0.001), economic status (p-value<0.001), number of  
4  
5 206 household members (p-value<0.001), place of residence (p-value<0.001), and source of  
6  
7 207 information (p-value<0.001) (Table 3). Participants living in Lattakia (77.6%) exhibited the  
8  
9 208 greatest awareness, whereas those in Ar-Raqqah (71.7%) followed by Deir-ez-Zor (71.8%)  
10  
11 209 exhibited the lowest. The mean knowledge differed across groups that acquired information  
12  
13 210 from different sources, the lowest awareness was among participants who chose family  
14  
15 211 members/friends as one of their source(s) (74.0%), whereas those with the highest awareness  
16  
17 212 acquired their information from lectures as one of their source(s) (78.2%), (Table 3).  
18  
19  
20  
21

22 213 When participants were asked if they were likely to share new information with friends  
23  
24 214 and family, 3513(98.0%) answered “yes”. There was a significant difference in mean  
25  
26 215 knowledge between those who were inclined to disseminate new information about COVID-  
27  
28 216 19 to friends and family (75.7%) compared with those who were not (72.3%) (p-value=0.002).  
29  
30 217 On exclusive use of personal belongings, 2692(75.1%) answered “yes”. We found no  
31  
32 218 significant correlation between mean knowledge and participant tendency to share personal  
33  
34 219 belongings with others (p-value=0.112). Of participants who knew someone infected with  
35  
36 220 COVID-19, 65(1.8%) answered “yes”. There was no significant difference in mean knowledge  
37  
38 221 between those who knew an infected individual (75.9%) compared with those who did not  
39  
40 222 (75.6%) (p-value=0.816).  
41  
42  
43  
44

### 45 223 **Multiple linear regression:**

46  
47  
48 224 Multiple linear regression analysis results: male gender (vs. female,  $\beta$ =-0.933, p=0.005);  
49  
50 225 education of secondary school or lower (vs. college/university and above,  $\beta$ =-3.782, p<0.001);  
51  
52 226 careers in government, private, business, military, and “other” sectors, as well as  
53  
54 227 unemployment (vs. health care workers,  $\beta$ =-3.592, p<0.001); poor and moderate economic  
55  
56 228 status (vs. good and excellent,  $\beta$ =-0.669, p<0.040); and over 5 household members (vs. of 1-5,  
57  
58  
59  
60

1  
2  
3 229  $\beta=-1.737$ ,  $p<0.001$ ) were associated with significantly poorer knowledge scores (Table 4).  
4  
5  
6 230 Careers in health care (vs. Unemployed,  $\beta=3.592$ ,  $p\text{-value}=<0.001$ ), and the 31-45 age  
7  
8 231 group (vs. 16-30,  $\beta=1.511$ ,  $p\text{-value}=0.005$ ) were associated with significantly higher  
9  
10 232 knowledge scores.

11  
12  
13 233

## 14 15 16 17 234 **Discussion:**

18  
19  
20 235 We found an overall mean knowledge score of 75.6%, indicating that most participants  
21  
22 236 were relatively knowledgeable about COVID-19, though less so compared to their counterparts  
23  
24 237 in China (90%).<sup>12</sup> This level of knowledge was unexpected given that only 10 cases of COVID-  
25  
26 238 19 had been confirmed in Syria at the time of the survey.<sup>24</sup>

27  
28  
29  
30 239 Poor knowledge was associated with males, non-post-secondary education, non-  
31  
32 240 healthcare occupations, unemployment, poor and moderate economic status, and households  
33  
34 241 with more than 5 members; similar trends were observed in China.<sup>12</sup> Correlating socio-  
35  
36 242 demographic variables with awareness is critical to public health efforts to mitigate the spread  
37  
38 243 of COVID-19. The data obtained from this study can be leveraged by the Syrian Ministry of  
39  
40 244 Health to tailor prevention and educational campaigns to populations with the widest  
41  
42 245 knowledge gaps.

43  
44  
45  
46 246 Our study showed a relatively high level of awareness 2535(70.7%) among the  
47  
48 247 population. In the general knowledge section (mean knowledge score 67%), the majority of the  
49  
50 248 participants 3383(94.3%) knew that COVID-19 is caused by a virus, similar to a Pakistani  
51  
52 249 study (93.3%).<sup>17</sup> Low awareness of the 2-to-14 day incubation period was found<sup>25</sup> among  
53  
54 250 dentists (36.1%) and HCW (36.4%) in similar studies.<sup>13</sup> 19 Syria has a relatively young  
55  
56 251 population; statistical data from 2018 showed that only an estimated 4.5% of the population  
57  
58  
59  
60

1  
2  
3 252 was over the age of 65.<sup>26</sup> 3489(97.3%) knew that COVID-19 infection can be severe and  
4  
5 253 potentially fatal in elderly, chronically ill, and immunodeficient patients. This is higher than in  
6  
7 254 studies conducted in China (73.2%) and India (88.37%).<sup>12 27</sup> 40.6% of Syrians are hypertensive,  
8  
9  
10 255 yet a staggering 79.8% of them are unaware of their condition. Diabetes is also prevalent,  
11  
12 256 affecting 11.9% of the population.<sup>28 29</sup> Such a rampant lack of awareness about chronic diseases  
13  
14 257 associated with high mortality in COVID-19 patients underscores the need for targeted  
15  
16  
17 258 awareness campaigns.

18  
19  
20 259 At the time of the survey, no standardized evidence-based protocols had yet been  
21  
22 260 developed to treat COVID-19 infections; only 2597(72.4%) participants knew that there was  
23  
24 261 no available treatment at that time; this is higher than a Kenyan study (40%) but significantly  
25  
26 262 lower than a Chinese study (94%).<sup>12 15</sup> A minority 103(2.9%) of participants thought there was  
27  
28 263 a vaccine available against COVID-19, even though vaccines have only become commercially  
29  
30 264 available in the past few months; by contrast, Coimbatore District and Pakistan were less  
31  
32 265 informed, with (18.6%) and (11.6%) respectively believing that such a vaccine was available  
33  
34 266 at the time. In the absence of a vaccine or effective treatment protocol for COVID-19 at the  
35  
36 267 time of the survey, controlling the spread of the disease was the best line of defence, and  
37  
38 268 remains so given the dire shortage of medication, ventilators, ICU capacity, and the continued  
39  
40 269 lack of a vaccine widely available to the Syrian people. We observed a considerable knowledge  
41  
42 270 gap in 1268(35.3%) with regards to ibuprofen as a treatment option. There is no available  
43  
44 271 evidence to suggest that ibuprofen is effective against COVID-19.<sup>30</sup>

45  
46 272 Participants showed a fair level of awareness regarding transmission pathways (70.7%),  
47  
48 273 very similar to a Pakistani study (70.8%).<sup>17</sup> The majority 3521(98.2%) of participants were  
49  
50 274 aware that respiratory droplets are common transmission vectors; this is similar to a Chinese  
51  
52 275 study (97.8%), but much higher than an Indian study (29.5%).<sup>12 16</sup> 3330(92.9%) participants  
53  
54  
55  
56  
57  
58  
59  
60



1  
2  
3 276 identified handshaking as a transmission pathway, higher than a study among Jordanian  
4  
5 277 dentists (85.6%).<sup>13</sup>  
6  
7

8 278 The majority of survey participants were sufficiently aware of the clinical features of  
9  
10 279 COVID-19 (76.0%), similar to a Pakistani study (77.7%).<sup>17</sup> A very high level of awareness of  
11  
12 280 the most common symptoms was found: fever 3563(99.4%), dry cough 3466(96.7%), fatigue  
13  
14 281 3405(95.0%), and myalgia 3019(84.2%), similar to findings from Chinese (96.4%) and Indian  
15  
16 282 (95.4%) studies.<sup>12 27</sup> When asked about sore throat, a high level of awareness 3037(84.7%) was  
17  
18 283 found compared to studies from India (15.2%) and among dentists in Jordan (28.5%).<sup>13 16</sup>  
19  
20 284 Knowledge about diarrhea as a symptom was lacking: only 1972(55.0%); a study among  
21  
22 285 dentists also showed low awareness (39.9%).<sup>13 16</sup> While infected individuals are frequently  
23  
24 286 asymptomatic, or present with mild symptoms, around 1 in every 5 infections can be  
25  
26 287 serious enough to require hospitalisation.<sup>31 32</sup> Only 2221(61.9%) participants were aware that  
27  
28 288 infected individuals can be asymptomatic, while a study among dentists (34.5%) reported much  
29  
30 289 lower awareness. Increasing public awareness about the variability of symptoms is particularly  
31  
32 290 important since those with mild or unreported symptoms may significantly contribute to the  
33  
34 291 transmission of COVID-19; the lack of health insurance, paid sick leave, telecommuting, or  
35  
36 292 other social and professional safety nets increase the likelihood that these “silent spreaders”  
37  
38 293 will underreport symptoms for fear of being forced to miss work.  
39  
40  
41  
42  
43

44 294 We found a high level of awareness in the preventive methods section (88.8%), similar  
45  
46 295 to a Pakistani study (85%).<sup>17</sup> Hand hygiene has been known to be an important element of  
47  
48 296 infection control since the 14<sup>th</sup> century.<sup>33</sup> Implementing hand-washing techniques can break  
49  
50 297 the transmission cycle and reduce the risk of infection by 6%-44%.<sup>34</sup> Almost all 3574(99.7%)  
51  
52 298 participants were aware that washing hands with soap and water is an important preventive  
53  
54 299 measure against COVID-19. This finding is in accordance with studies from Joran (97.0%),  
55  
56 300 and India (96.2%, and 87%).<sup>13 16 19</sup>  
57  
58  
59  
60



1  
2  
3 301 This year the WHO recommended that the following mitigation measures be  
4  
5 302 implemented during the holy month of Ramadan: cancelling social and religious gatherings,  
6  
7  
8 303 holding events outdoors for adequate ventilation, physical distancing of at least 1 meter  
9  
10 304 between people, and the use of technology to broadcast ceremonies on television.<sup>35 36</sup> The  
11  
12 305 majority 3574(99.7%) identified avoiding mass gatherings as a preventive measure; studies in  
13  
14 306 China (98.6%) and Coimbatore District (97.7%) reported similar awareness.<sup>12 27</sup> Cheap and  
15  
16 307 efficient interventions such as N95 (filtration capacity=95%) have a 91% effectiveness of  
17  
18 308 blocking pathogen transmission.<sup>37</sup> 3204(89.3%) participants considered wearing a face mask  
19  
20 309 when leaving home as an effective prevention method, compared with a Coimbatore District  
21  
22  
23  
24 310 study (93.02%).<sup>27</sup>

25  
26 311 Since Syrian society is particularly vulnerable to COVID-19, this knowledge gap is  
27  
28 312 potentially dangerous and should be addressed to mitigate disease spread. Only 2482(69.2%)  
29  
30 313 knew that the flu vaccine offers no protection against COVID-19; this is similar to a  
31  
32 314 Coimbatore District study (67.4%), but lower than a study amongst HCWs (90.7%).<sup>19 27</sup>  
33  
34 315 3305(92.2%) were aware that individuals showing symptoms should quarantine themselves,  
35  
36 316 lower than in China (98.2%) and India (95.8%).<sup>12 16</sup>

37  
38  
39 317 North-East Syria (NES) has a population of over 4 million people, 600,000 of whom  
40  
41 318 are internally displaced refugees, 100,000 of whom live in overcrowded camps: only 2 of  
42  
43 319 NES's 11 hospitals are currently functioning. NES consists of 3 governorates: Ar-Raqqah,  
44  
45 320 Deir-ez-Zor, and Al-Hasakah. With only 22 ICU beds, (18 in Al-Hasakah, 4 in Ar-Raqqah, and  
46  
47 321 none in Deir-ez-Zor), the maximum capacity threshold is only 80 COVID-19 cases. Ar-Raqqah  
48  
49 322 and Deir-ez-Zor, the most vulnerable governorates, also showed the lowest awareness in the  
50  
51 323 study (71.7%), and (71.8%). This is a potentially catastrophic situation, and a concern to the  
52  
53 324 international community, as an unmonitored, uncontrolled outbreak in NES can prolong the  
54  
55 325 global pandemic.  
56  
57  
58  
59  
60

1  
2  
3 326 Since storming the international stage two years ago, COVID-19 caught the whole world off  
4  
5 327 guard; ambiguity and uncertainly have been and continue to be defining features of this pandemic.  
6  
7 328 Despite the emergence of effective vaccines and treatment protocols, timely global availability is a  
8  
9 329 continuing challenge. We have yet to achieve a critical mass of vaccinations and herd immunity, as  
10  
11 330 evidenced by the emergence of wave after wave of infection in both developed and developing  
12  
13 331 countries.

14  
15 332 Further research is necessary to study transmission through sexual contact (body fluids other  
16  
17 333 than respiratory droplets) and undercooked food. Numerous cases of animal infection, including house  
18  
19 334 pets, apes, and even tigers, highlight the need for extensive studies into horizontal transmission.<sup>38 39</sup>  
20  
21 335 Long-term studies into permanent immunity, and fetal abnormalities as a result of maternal infection  
22  
23 336 are also necessary.  
24  
25

26 337

### 30 338 **Limitations:**

31  
32  
33 339 Our findings can only be generalized about online users of well-educated Syrians of  
34  
35 340 good socio-economic status. Syrians vulnerable to COVID-19, such as the elderly and rural  
36  
37 341 residents, are more likely to exhibit poor knowledge and awareness due to limited internet  
38  
39 342 access. As such, reaching out to these populations must be prioritized. Even though all Syrian  
40  
41 343 governorates were represented in this study, most participants lived in Damascus and Rural  
42  
43 344 Damascus. Credible published national data regarding the socio-demographic characteristics  
44  
45 345 of Syrians are not available to evaluate the representativeness of our sample. Furthermore, an  
46  
47 346 assessment of the Syrian population's practices relating to COVID-19 and the attitudes  
48  
49 347 driving them is necessary to complete the picture.  
50  
51  
52

53 348

### 58 349 **Conclusion:**

1  
2  
3 350 COVID-19 has been a dire warning to humanity about the fragility of its social,  
4  
5 351 economic, and healthcare institutions. Our study revealed good public awareness of clinical  
6  
7 352 features and preventive measures. However general knowledge and knowledge about  
8  
9 353 transmission pathways was suboptimal. Syrians of good socio-economic status, in particular  
10  
11 354 young well-educated women, have shown good knowledge. Our national response must adapt  
12  
13 355 to the growing threat of COVID-19 by adopting public awareness strategies and behaviours to  
14  
15 356 contain the disease both within and beyond our borders.  
16  
17  
18  
19  
20  
21  
22

23 358 **Abbreviations:** COVID-19: Coronavirus Disease 2019; MERS: Middle East Respiratory  
24  
25 359 Syndrome; SARS: Severe Acute Respiratory Syndrome; WHO: World Health Organization;  
26  
27 360 PHEIC: Public Health Emergency of International Concern; ICU: Intensive care unit; IRB:  
28  
29 361 Institutional Review Board; SPSS: Statistical Package for Social Sciences; SD: Standard  
30  
31 362 Deviation; HCW: Health Care Worker.  
32  
33  
34  
35  
36  
37  
38  
39  
40  
41

42 364 **Acknowledgments:**

43 365 We are thankful to the management of the Syrian Private University for the support in  
44  
45 366 the field of medical training and research. We are thankful to everyone who participated in this  
46  
47 367 study and to Mrs. Marah Marrawi for her statistical help.  
48  
49  
50  
51  
52

53 369 **Funding:**

54  
55  
56 370 This research received no specific grant from SPU or any other funding agency in the  
57  
58 371 public, commercial or non-profit sectors.  
59  
60

1  
2  
3 372  
4  
5  
67 **373 Availability of data and materials:**  
8  
9

10 374 All data related to this paper's conclusion are available and stored by the authors. All  
11  
12 375 data are available from the corresponding author on a reasonable request.  
13

14  
15 376  
1617  
18 **377 Declarations:**  
1920 **378 Ethics approval and consent to participate:**

21 379 This study was approved by the Institutional Review Board (IRB) at the Syrian Private  
22  
23  
24 380 University (SPU). All Participants confirmed their written consent by answering a yes-no  
25  
26 381 question. Participants under the age of 18 required verbal informed parental consent, as well as  
27  
28 382 submission of parent/guardian contact information. The researchers were responsible for  
29  
30 383 contacting the parents/guardians to obtain verbal consent before the child was given access to  
31  
32 384 the survey. The verbal and written form of consent was approved by the IRB at SPU.  
33  
34 385 Participation in the study was voluntary and participants were assured that anyone who was  
35  
36 386 not inclined to participate or decided to withdraw after giving consent would not be victimized.  
37  
38 387 All information collected from this study was kept strictly confidential.  
39  
40  
41  
42

43 **388 Consent for Publication:**

44 389 Not applicable.  
45

46 **390 Competing interests:**

47 391 The authors declare that they have no competing interests.  
48  
49  
50

51 **392 Authors' contributions:**

52 393 FM conceptualized the study, participated in the design, wrote the study protocol,  
53  
54 394 performed the statistical analysis, did a literature search, and drafted the manuscript. BB  
55  
56 395 participated in study design, did a literature search, and drafted the manuscript. HA, and NA  
57  
58 396 did a literature search and revision of the draft. All authors read and approved the final draft.  
59  
60

397

398 **Tables and Figures:**399 **Table 1.**

400

**Table 1. Socio-demographic characteristics: (n=3586)**

|                   |               |                   |                       |                               |                   |
|-------------------|---------------|-------------------|-----------------------|-------------------------------|-------------------|
| <b>Gender (%)</b> | <b>Male</b>   | <b>1142(31.8)</b> | <b>Education (%)</b>  | <b>Primary School</b>         | <b>25(0.7)</b>    |
|                   | <b>Female</b> | <b>2444(68.2)</b> |                       | <b>Intermediate School</b>    | <b>166(4.6)</b>   |
| <b>Age (%)</b>    | <b>&lt;20</b> | <b>1204(33.6)</b> |                       | <b>Secondary school</b>       | <b>375(10.4)</b>  |
|                   | <b>20-24</b>  | <b>1104(30.8)</b> |                       | <b>College/University</b>     | <b>2839(79.2)</b> |
|                   | <b>25-29</b>  | <b>446(12.4)</b>  |                       | <b>Master's degree</b>        | <b>157(4.4)</b>   |
|                   | <b>30-34</b>  | <b>266(7.4)</b>   |                       | <b>PhD</b>                    | <b>24(0.7)</b>    |
|                   | <b>35-39</b>  | <b>186(5.2)</b>   | <b>Occupation (%)</b> | <b>Health care worker</b>     | <b>634(17.7)</b>  |
|                   | <b>&gt;39</b> | <b>380(10.6)</b>  |                       | <b>Government institution</b> | <b>283(7.9)</b>   |
| <b>Social</b>     | <b>Single</b> | <b>2279(63.5)</b> |                       | <b>Private institution</b>    | <b>182(5.1)</b>   |

|                            |                          |                   |                              |                   |                   |
|----------------------------|--------------------------|-------------------|------------------------------|-------------------|-------------------|
| <b>Status (%)</b>          | <b>In a relationship</b> | <b>286(8.0)</b>   |                              | <b>Business</b>   | <b>198(5.5)</b>   |
|                            | <b>Married</b>           | <b>943(26.3)</b>  |                              | <b>Military</b>   | <b>32(0.9)</b>    |
|                            | <b>Divorced</b>          | <b>46(1.3)</b>    |                              | <b>Unemployed</b> | <b>1822(50.8)</b> |
|                            | <b>Widowed</b>           | <b>32(0.9)</b>    |                              | <b>Other</b>      | <b>435(12.1)</b>  |
| <b>Economic Status (%)</b> | <b>Poor</b>              | <b>247(6.9)</b>   | <b>Household members (%)</b> | <b>0</b>          | <b>46(1.3)</b>    |
|                            | <b>Moderate</b>          | <b>1247(34.8)</b> |                              | <b>1-5</b>        | <b>2751(76.7)</b> |
|                            | <b>Good</b>              | <b>1761(49.1)</b> |                              | <b>&gt;5</b>      | <b>789(22)</b>    |
|                            | <b>Excellent</b>         | <b>331(9.2)</b>   |                              |                   |                   |

401

402 <sup>1</sup>Poor: income does not provide essential needs for the family. <sup>2</sup>Moderate: income provides essential  
 403 needs for the family but no more. <sup>3</sup>Good: income provides essential needs and some luxury  
 404 requirements. <sup>4</sup>Excellent: income provides luxury requirements.

405

406 **Table 2.**

407

408

**Table 2. General Knowledge, Transmission, Signs and Symptoms, and Prevention of COVID-19:  
 (n=3586)**

| General Knowledge                                                                                                     |                      |            |                           |                       |            |
|-----------------------------------------------------------------------------------------------------------------------|----------------------|------------|---------------------------|-----------------------|------------|
| Causative Agent<br>N(%)                                                                                               | Virus                | 3383(94.3) | Incubation period<br>N(%) | 1 Minute to<br>1 Hour | 18(0.5)    |
|                                                                                                                       | Bacteria             | 39(1.1)    |                           | 1 Hour to<br>2 Days   | 58(1.6)    |
|                                                                                                                       | Parasite             | 8(0.2)     |                           | 2 Days to 2<br>Weeks  | 2535(70.7) |
|                                                                                                                       | Immune<br>deficiency | 46(1.3)    |                           | 2 Weeks to<br>1 Month | 958(26.7)  |
|                                                                                                                       | Fungus               | 0(0.0)     |                           | >1 Month              | 17(0.5)    |
|                                                                                                                       | Inherited            | 2(0.1)     |                           |                       |            |
|                                                                                                                       | Do Not Know          | 108(3.0)   |                           |                       |            |
|                                                                                                                       |                      |            |                           |                       |            |
|                                                                                                                       |                      | YES(%)     | NO(%)                     | DO NOT<br>KNOW(%)     |            |
| <b>Can infection with COVID-19 confer permanent immunity?</b>                                                         |                      | 815(22.7)  | 1500(41.8)                | 1271(35.5)            |            |
| <b>Can COVID-19 cause severe illness and lead to death in elderly, chronically ill, and immunodeficient patients?</b> |                      | 3489(97.3) | 28(0.8)                   | 69(1.9)               |            |
| <b>Can COVID-19 cause infertility?</b>                                                                                |                      | 461(12.9)  | 1222(34.1)                | 1903(53.0)            |            |

|                                                                                              |            |            |            |
|----------------------------------------------------------------------------------------------|------------|------------|------------|
| <b>Is COVID-19 teratogenic (i.e. cause malformations/ abnormalities to an embryo/fetus)?</b> | 157(4.4)   | 1433(40.0) | 1996(55.6) |
| <b>Is there no available treatment against COVID-19?</b>                                     | 2597(72.4) | 515(14.4)  | 474(13.2)  |
| <b>Can COVID-19 be treated with antibiotics?</b>                                             | 1228(34.3) | 1790(49.9) | 568(15.8)  |
| <b>Can COVID-19 be treated with Ibuprofen?</b>                                               | 1268(35.3) | 1921(53.6) | 397(11.1)  |
| <b>Are there available COVID-19 vaccines?</b>                                                | 103(2.9)   | 2986(83.3) | 497(13.8)  |
| <b>Transmission Pathways</b>                                                                 |            |            |            |
| <b>Respiratory droplets (from coughing or sneezing)</b>                                      | 3521(98.2) | 21(0.6)    | 44(1.2)    |
| <b>Handshaking</b>                                                                           | 3330(92.9) | 189(5.3)   | 67(1.8)    |
| <b>Touching an infected person's personal belongings</b>                                     | 3387(94.4) | 131(3.7)   | 68(1.9)    |
| <b>Animals-to-human</b>                                                                      | 910(25.4)  | 1973(55.0) | 703(19.6)  |
| <b>Undercooked food</b>                                                                      | 1301(36.3) | 1734(48.3) | 551(15.4)  |
| <b>Sexual contact</b>                                                                        | 1210(33.7) | 1477(41.2) | 899(25.1)  |
| <b>Horizontal transmission</b>                                                               | 1130(31.5) | 1160(32.4) | 1296(36.1) |



| <b>Signs and Symptoms</b>                                                        |            |            |           |
|----------------------------------------------------------------------------------|------------|------------|-----------|
| <b>Fever</b>                                                                     | 3563(99.4) | 9(0.2)     | 14(0.4)   |
| <b>Sneezing</b>                                                                  | 2353(65.6) | 1000(27.9) | 233(6.5)  |
| <b>Sore throat</b>                                                               | 3037(84.7) | 358(10.0)  | 191(5.3)  |
| <b>Headache</b>                                                                  | 3186(88.8) | 190(5.3)   | 210(5.9)  |
| <b>Chest pain</b>                                                                | 3050(85.0) | 254(7.1)   | 282(7.9)  |
| <b>Body aches (generalized pain)</b>                                             | 3019(84.2) | 260(7.2)   | 307(8.6)  |
| <b>Fatigue</b>                                                                   | 3405(95.0) | 72(2.0)    | 109(3.0)  |
| <b>Diarrhea</b>                                                                  | 1972(55.0) | 971(27.1)  | 643(17.9) |
| <b>Dry cough</b>                                                                 | 3466(96.7) | 44(1.2)    | 76(2.1)   |
| <b>Productive cough</b>                                                          | 458(12.8)  | 2586(72.1) | 542(15.1) |
| <b>Bleeding</b>                                                                  | 130(3.6)   | 2613(72.9) | 843(23.5) |
| <b>Asymptomatic</b>                                                              | 2221(61.9) | 375(10.5)  | 990(27.6) |
| <b>Prevention Methods</b>                                                        |            |            |           |
| <b>Does wearing a face mask outside the home offer protection from COVID-19?</b> | 3204(89.3) | 314(8.8)   | 68(1.9)   |
| <b>Does washing hands with soap and water offer protection from COVID-19?</b>    | 3574(99.7) | 5(0.1)     | 7(0.2)    |

|                                                                                                         |            |            |           |
|---------------------------------------------------------------------------------------------------------|------------|------------|-----------|
| <b>Does avoiding crowded places offer protection from COVID-19?</b>                                     | 3574(99.7) | 4(0.1)     | 8(0.2)    |
| <b>Does the flu vaccine offer protection from COVID-19?</b>                                             | 331(9.2)   | 2482(69.2) | 773(21.6) |
| <b>Does staying at home offer protection from COVID-19?</b>                                             | 3554(99.1) | 15(0.4)    | 17(0.5)   |
| <b>Does using hand sanitizer offer protection from COVID-19?</b>                                        | 3430(95.6) | 104(2.9)   | 52(1.5)   |
| <b>Does cleaning household surfaces with bleach offer protection from COVID-19?</b>                     | 3408(95.0) | 110(3.1)   | 68(1.9)   |
| <b>Does cleaning fruits and vegetables with soap and water offer protection from COVID-19?</b>          | 3262(90.9) | 221(6.2)   | 103(2.9)  |
| <b>Does cleaning surfaces with a mixture of Flash and bleach offer a safe protection from COVID-19?</b> | 158(4.4)   | 3301(92.1) | 127(3.5)  |
| <b>Does the quarantine of symptomatic individuals protect others from COVID-19?</b>                     | 3305(92.2) | 241(6.7)   | 40(1.1)   |
| <b>Do cumin, anise, and mint offer protection from COVID-19?</b>                                        | 1041(29.0) | 1934(53.9) | 611(17.1) |

409 **Table 3.**

**Table 3. Mean knowledge score of participants by demographic variables, and source of information (one way ANOVA), (n= 3586)**

| Characteristics   |        | Number of participants (%) | Mean Knowledge Score ( $\pm$ SD%) | F-test/ T-test | P-value |
|-------------------|--------|----------------------------|-----------------------------------|----------------|---------|
| Gender            | Male   | 1142(31.8)                 | 75.0( $\pm$ 10.1)                 | -2.625         | 0.009*  |
|                   | Female | 2444(68.2)                 | 75.9( $\pm$ 9)                    |                |         |
| Age-group (years) | <20    | 1204(33.6)                 | 75.0( $\pm$ 9.9)                  | 2.990          | 0.011*  |
|                   | 20-24  | 1104(30.8)                 | 76.4( $\pm$ 9.3)                  |                |         |
|                   | 25-29  | 446(12.4)                  | 76.0( $\pm$ 9.4)                  |                |         |
|                   | 30-34  | 266(7.4)                   | 75.4( $\pm$ 9.4)                  |                |         |
|                   | 35-39  | 186(5.2)                   | 76.1( $\pm$ 7.6)                  |                |         |

|                      |                     |            |             |        |         |
|----------------------|---------------------|------------|-------------|--------|---------|
|                      | >39                 | 380(10.6)  | 75.1(±8.6)  |        |         |
| <b>Social status</b> | Single              | 2279(63.5) | 75.8(±9.3)  | 2.485  | 0.042*  |
|                      | In a relationship   | 286(8.0)   | 76.6(±8.6)  |        |         |
|                      | Married             | 943(26.3)  | 75.1(±9.4)  |        |         |
|                      | Divorced            | 46(1.3)    | 73.9(±8.8)  |        |         |
|                      | Widowed             | 32(0.9)    | 73.4(±15.9) |        |         |
| <b>Residence</b>     | Urban               | 2426(67.7) | 75.8(±9.3)  | 1.652  | 0.099   |
|                      | Rural               | 1160(32.3) | 75.3(±9.6)  |        |         |
| <b>Education</b>     | Primary school      | 25(0.7)    | 66.5(±12.4) | 26.176 | <0.001* |
|                      | Intermediate school | 166(4.6)   | 73.2(±9.3)  |        |         |
|                      | Secondary school    | 375(10.4)  | 70.0(±13)   |        |         |

|                   |                        |            |             |        |         |
|-------------------|------------------------|------------|-------------|--------|---------|
|                   | College/University     | 2839(79.2) | 76.3(±8.9)  |        |         |
|                   | Master's degree        | 157(4.4)   | 77.2(±9.7)  |        |         |
|                   | PhD                    | 24(0.7)    | 76.6(±8.5)  |        |         |
| <b>Occupation</b> | Health care worker     | 634(17.7)  | 78.6(±8.6)  | 16.379 | <0.001* |
|                   | Government institution | 283(7.9)   | 75.7(±7.9)  |        |         |
|                   | Private institution    | 182(5.1)   | 75.5(±9)    |        |         |
|                   | Business               | 198(5.5)   | 73.4(±10.2) |        |         |

|                          |            |            |             |        |         |
|--------------------------|------------|------------|-------------|--------|---------|
|                          | Military   | 32(0.9)    | 71.2(±15.6) |        |         |
|                          | Unemployed | 1822(50.8) | 75.3(±9.2)  |        |         |
|                          | Other      | 435(12.1)  | 74.0(±10.2) |        |         |
| <b>Economic status</b>   | Excellent  | 331(9.2)   | 76.6(±11.1) | 7.108  | <0.001* |
|                          | Good       | 1761(49.1) | 76.2(±9.4)  |        |         |
|                          | Moderate   | 1247(34.8) | 74.9(±9)    |        |         |
|                          | Poor       | 247(6.9)   | 74.3(±9.3)  |        |         |
| <b>Household members</b> | 0          | 46(1.3)    | 74.4(±10.6) | 15.451 | <0.001* |
|                          | 1-5        | 2751(76.7) | 76.1(±9)    |        |         |
|                          | >5         | 789(22.0)  | 74.0(±10.2) |        |         |

|                              |                         |             |             |        |         |
|------------------------------|-------------------------|-------------|-------------|--------|---------|
| <b>Source of information</b> | Health websites         | 2823(78.7%) | 76.4(±8.7)  | 24.523 | <0.001* |
|                              | Social media            | 1998(55.7%) | 74.6(±9.6)  |        |         |
|                              | Television/ radio       | 1572(43.8%) | 75.5(±9)    |        |         |
|                              | Family members/ friends | 528(14.7%)  | 74.0(±10.3) |        |         |
|                              | Lectures                | 517(14.4%)  | 78.2(±7.5)  |        |         |
|                              | Magazines/ books        | 266(7.4%)   | 77.6(±8.8)  |        |         |

410

411 **Table 4.**

**Table 4.** Multiple linear regression on variables associated with poor COVID-19 knowledge

| <b>Variable</b>                 | <b>Coefficient</b> | <b>Standard error</b> | <b>t</b> | <b>P</b> |
|---------------------------------|--------------------|-----------------------|----------|----------|
| Male gender (reference: female) | -0.933             | 0.334                 | -2.794   | 0.005*   |

|                                                                                                                                   |        |       |        |         |
|-----------------------------------------------------------------------------------------------------------------------------------|--------|-------|--------|---------|
| education of secondary school or lower (reference: college/university and above)                                                  | -3.782 | 0.466 | -8.125 | <0.001* |
| careers in government, private, business, military, and “other” sectors, as well as unemployment (reference: health care workers) | -3.592 | 0.474 | -7.579 | <0.001* |
| poor and moderate economic status (reference: good and excellent)                                                                 | -0.669 | 0.325 | -2.057 | 0.040*  |
| >5 household members (reference: of 1-5)                                                                                          | -1.737 | 0.374 | -4.648 | <0.001* |

412

413 **Figures and tables legends:**414 **Table 1.** Sociodemographic characteristics415 **Table 2.** General Knowledge, Transmission, Signs and Symptoms, and Prevention around  
416 COVID-19417 **Table 3.** Mean knowledge score of participants by demographic variables418 **Table 4.** Multiple linear regression on variables associated with poor COVID-19 knowledge419 **Figure 1.** Distribution of participants according to governorates and education level



1  
2  
3 420  
4 421

## References:

- 5  
6  
7 422  
8 423  
9 424  
10 425  
11 426  
12 427  
13 428  
14 429  
15  
16 430  
17 431  
18 432  
19 433  
20 434  
21 435  
22 436  
23 437  
24 438  
25 439  
26 440  
27 441  
28 442  
29 443  
30 444  
31 445  
32 446  
33 447  
34 448  
35 449  
36 450  
37 451  
38 452  
39 453  
40 454  
41 455  
42 456  
43 457  
44 458  
45 459  
46 460  
47 461  
48 462  
49 463  
50 464  
51 465  
52 466  
53 467  
54 468  
55 469  
56 468  
57 469  
58 468  
59 469  
60
1. Huang C, Wang Y, Li X, et al. Clinical features of patients infected with 2019 novel coronavirus in Wuhan, China. *The Lancet* 2020;395(10223):497-506. doi: 10.1016/s0140-6736(20)30183-5
  2. Viner RM, Ward JL, Hudson LD, et al. Systematic review of reviews of symptoms and signs of COVID-19 in children and adolescents. 2020
  3. Rahman HS, Aziz MS, Hussein RH, et al. The transmission modes and sources of COVID-19: A systematic review. 2020
  4. McKernan B. Syria confirms first Covid-19 case amid fears of catastrophic spread. *The Guardian* 2020
  5. Organization WH. Coronavirus disease 2019 (COVID-19): situation report, 106. 2020
  6. Gharibah M, Mehchy Z. COVID-19 pandemic: Syria's response and healthcare capacity. 2020
  7. Ajilore K, Atakiti I, Onyenankya K. College students' knowledge, attitudes and adherence to public service announcements on Ebola in Nigeria: Suggestions for improving future Ebola prevention education programmes. *Health Education Journal* 2017;76(6):648-60.
  8. Tachfouti N, Slama K, Berraho M, et al. The impact of knowledge and attitudes on adherence to tuberculosis treatment: a case-control study in a Moroccan region. *Pan African Medical Journal* 2012;12(1)
  9. McNatt Z, Boothby NG, Al-Shannaq H, et al. Impact of Separation on Refugee Families: Syrian Refugees in Jordan. 2018
  10. Syria anniversary press release. *United Nations Office for the Coordination of Humanitarian Affairs (OCHA)* 2020
  11. UNICEF Syria Crisis Situation Report 2019
  12. Zhong B-L, Luo W, Li H-M, et al. Knowledge, attitudes, and practices towards COVID-19 among Chinese residents during the rapid rise period of the COVID-19 outbreak: a quick online cross-sectional survey. *International Journal of Biological Sciences* 2020;16(10):1745.
  13. Khader Y, Al Nsour M, Al-Batayneh OB, et al. Dentists' Awareness, Perception, and Attitude Regarding COVID-19 and Infection Control: Cross-Sectional Study Among Jordanian Dentists. *JMIR Public Health and Surveillance* 2020;6(2):e18798.
  14. Qarawi A, Ng SJ, Gad A, et al. Awareness and Preparedness of Hospital Staff against Novel Coronavirus (COVID-2019): A Global Survey - Study Protocol. *SSRN Electronic Journal* 2020 doi: 10.2139/ssrn.3550294
  15. Austrian K, Pinchoff J, Tidwell JB, et al. COVID-19 related knowledge, attitudes, practices and needs of households in informal settlements in Nairobi, Kenya. 2020
  16. Roy D, Tripathy S, Kar SK, et al. Study of knowledge, attitude, anxiety & perceived mental healthcare need in Indian population during COVID-19 pandemic. *Asian Journal of Psychiatry* 2020:102083.
  17. Hussain T, Khan S, Gilani U, et al. Evaluation of General Awareness Among Professionals Regarding COVID-19: A Survey Based Study from Pakistan. 2020
  18. Zhou M, Tang F, Wang Y, et al. Knowledge, attitude and practice regarding COVID-19 among health care workers in Henan, China. *Journal of Hospital Infection* 2020
  19. Bhagavathula AS, Aldhaleei WA, Rahmani J, et al. Novel Coronavirus (COVID-19) Knowledge and Perceptions: A Survey on Healthcare workers. *medRxiv* 2020
  20. Organization WH. Introduction to COVID-19: methods for detection, prevention, response and control. 2020
  21. Organization WH. Q&As on COVID-19 and related health topics.
  22. Organization WH. Water, sanitation, hygiene and waste management for COVID-19: technical brief, 03 March 2020: World Health Organization, 2020.
  23. Organization WH. Key planning recommendations for mass gatherings in the context of COVID-19: interim guidance, 19 March 2020: World Health Organization, 2020.

- 1  
2  
3 470 24. Organization WH. Coronavirus disease 2019 (COVID-19): situation report, 71. 2020  
4 471 25. Backer J, Klinkenberg D, Wallinga J. Incubation period of 2019 novel coronavirus (2019-nCoV)  
5 472 infections among travellers from Wuhan, China, 20–28 January 2020. *Eurosurveillance*  
6 473 2020;25 doi: 10.2807/1560-7917.ES.2020.25.5.2000062  
7 474 26. Plecher H. Age structure in Syria 2018. *Statista* 2020  
8 475 27. Vadivu TS, Annamuthu P. An Awareness and Perception of COVID-19 among General Public—A  
9 476 Cross Sectional Analysis. 2014  
10 477 28. Organization WH. Web World Health Organization—Diabetes country profiles: Diakses, 2016.  
11 478 29. Tailakh A, Evangelista LS, Menten JC, et al. Hypertension prevalence, awareness, and control in A  
12 479 rab countries: A systematic review. *Nursing & health sciences* 2014;16(1):126-30.  
13 480 30. The use of non-steroidal anti-inflammatory drugs (NSAIDs) in patients with COVID-19. *World*  
14 481 *Health Organization* 2020  
15 482 31. Surveillances V. The epidemiological characteristics of an outbreak of 2019 novel coronavirus  
16 483 diseases (COVID-19)—China, 2020. *China CDC Weekly* 2020;2(8):113-22.  
17 484 32. Organization WH. Getting your workplace ready for COVID-19: How COVID-19 spreads, 19 March  
18 485 2020: World Health Organization, 2020.  
19 486 33. Best M, Neuhauser D. Ignaz Semmelweis and the birth of infection control. *Quality & safety in*  
20 487 *health care* 2004;13:233-4. doi: 10.1136/qhc.13.3.233  
21 488 34. Rabie T, Curtis V. Handwashing and Risk of Respiratory Infections: A Quantitative Systematic  
22 489 Review. *Tropical medicine & international health : TM & IH* 2006;11:258-67. doi:  
23 490 10.1111/j.1365-3156.2006.01568.x  
24 491 35. Practical considerations and recommendations for religious leaders and faith-based communities  
25 492 in the context of COVID-19. *World Health Organization* 2020  
26 493 36. Safe Ramadan practices in the context of the COVID-19 *World Health Organization* 2020  
27 494 37. Jefferson T, Foxlee R, Del Mar C, et al. Physical interventions to interrupt or reduce the spread of  
28 495 respiratory viruses: systematic review. *Bmj* 2008;336(7635):77-80.  
29 496 38. COVID-19 and Animals. *Centers for Disease Control and Prevention* 2021  
30 497 39. Daly N. First great apes at U.S. zoo receive COVID-19 vaccine made for animals. *National*  
31 498 *Geographic* 2021  
32  
33  
34  
35  
36 499  
37  
38  
39  
40  
41  
42  
43  
44  
45  
46  
47  
48  
49  
50  
51  
52  
53  
54  
55  
56  
57  
58  
59  
60

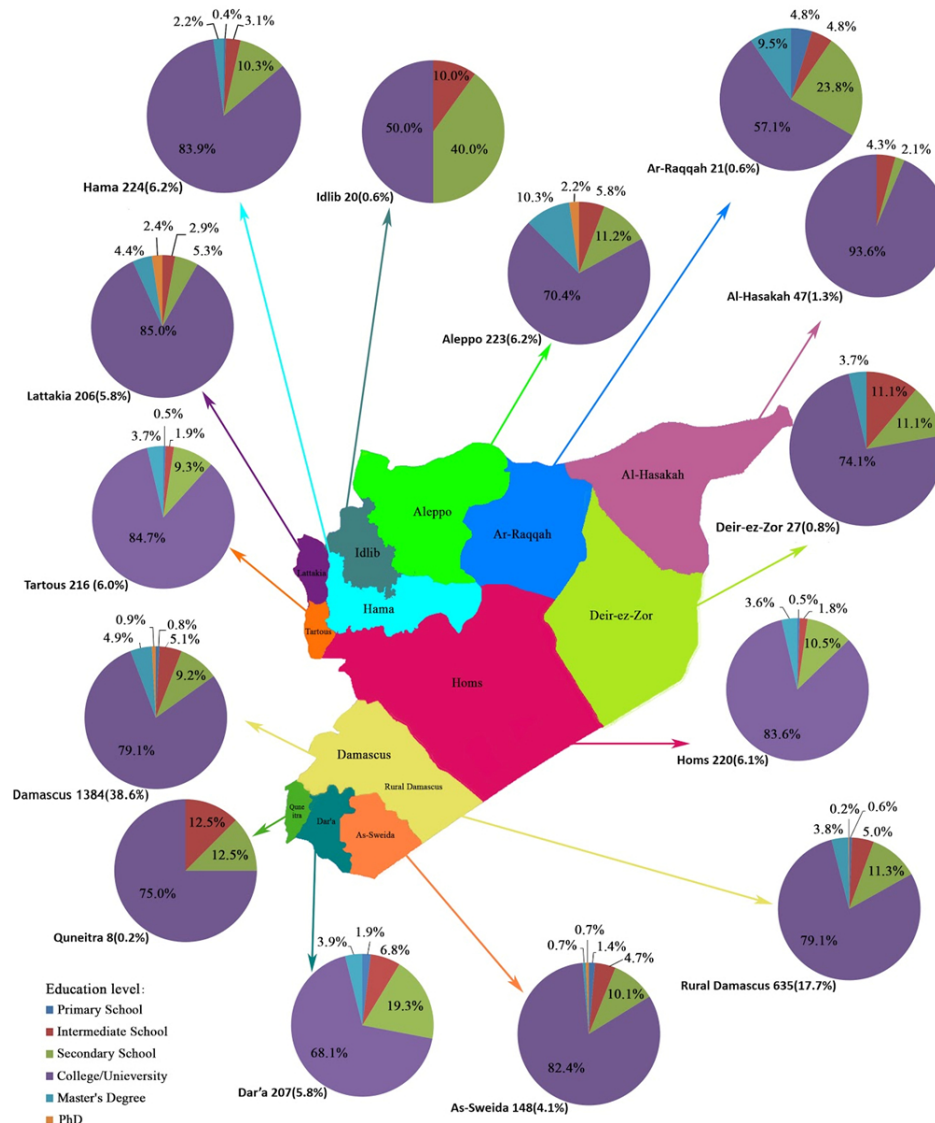

Figure 1. Distribution of participants according to governorates and education level

1 **Attached Survey:**2 **Appendix 1**

| Socio-demographic Characteristics                                                                                                                                                                                                                                                                           |                                                                                                                                                                                                                                                                                                                                                                                                                                                                                                  |
|-------------------------------------------------------------------------------------------------------------------------------------------------------------------------------------------------------------------------------------------------------------------------------------------------------------|--------------------------------------------------------------------------------------------------------------------------------------------------------------------------------------------------------------------------------------------------------------------------------------------------------------------------------------------------------------------------------------------------------------------------------------------------------------------------------------------------|
| <b>Age (years):</b><br><input type="checkbox"/> Below 15 <input type="checkbox"/> 15-20 <input type="checkbox"/> 20-30 <input type="checkbox"/> 30-50<br><input type="checkbox"/> 40-50 <input type="checkbox"/> 50-60 <input type="checkbox"/> 60-70<br><input type="checkbox"/> Above 70                  | <b>Gender:</b><br><input type="checkbox"/> Male<br><input type="checkbox"/> Female                                                                                                                                                                                                                                                                                                                                                                                                               |
| <b>Marital status:</b><br><input type="checkbox"/> Single <input type="checkbox"/> Relationship <input type="checkbox"/> Married<br><input type="checkbox"/> Divorced <input type="checkbox"/> Widowed                                                                                                      | <b>Educational level:</b><br><input type="checkbox"/> Primary school <input type="checkbox"/> Intermediate school<br><input type="checkbox"/> Secondary school <input type="checkbox"/> University/College<br><input type="checkbox"/> Master's Degree <input type="checkbox"/> PHD Degree                                                                                                                                                                                                       |
| <b>Occupation:</b><br><input type="checkbox"/> Health care worker <input type="checkbox"/> Government<br>institution <input type="checkbox"/> Private institution <input type="checkbox"/> Business<br><input type="checkbox"/> Military <input type="checkbox"/> Unemployed <input type="checkbox"/> Other | <b>Residence:</b><br><input type="checkbox"/> Damascus/Rural Damascus <input type="checkbox"/> Hama<br><input type="checkbox"/> Aleppo <input type="checkbox"/> Homs <input type="checkbox"/> Tartous <input type="checkbox"/> Lattakia<br><input type="checkbox"/> Dara'a <input type="checkbox"/> As-Sweida <input type="checkbox"/> Al Hasakah<br><input type="checkbox"/> Deir-ez-Zor <input type="checkbox"/> Idlib <input type="checkbox"/> Ar-Raqqah<br><input type="checkbox"/> Quneitra |
| <b>Area:</b><br><input type="checkbox"/> Rural <input type="checkbox"/> Urban                                                                                                                                                                                                                               | <b>Economic Status:</b><br><input type="checkbox"/> Excellent <input type="checkbox"/> Good <input type="checkbox"/> Moderate<br><input type="checkbox"/> Poor                                                                                                                                                                                                                                                                                                                                   |
| <b>Do you smoke?</b><br><input type="checkbox"/> Yes <input type="checkbox"/> No                                                                                                                                                                                                                            | <b>Do you drink alcohol?</b><br><input type="checkbox"/> Yes <input type="checkbox"/> No                                                                                                                                                                                                                                                                                                                                                                                                         |
| <b>How many people do you live with?</b><br><input type="checkbox"/> Alone <input type="checkbox"/> 1-5 <input type="checkbox"/> 6-10 <input type="checkbox"/> 11-15 <input type="checkbox"/> 16-20 <input type="checkbox"/> Above 20                                                                       |                                                                                                                                                                                                                                                                                                                                                                                                                                                                                                  |
|                                                                                                                                                                                                                                                                                                             |                                                                                                                                                                                                                                                                                                                                                                                                                                                                                                  |
| <b>Do you share toiletries/personal care products with others?</b><br><input type="checkbox"/> Yes <input type="checkbox"/> No                                                                                                                                                                              |                                                                                                                                                                                                                                                                                                                                                                                                                                                                                                  |
| <b>Do you know anyone infected with COVID-19?</b><br><input type="checkbox"/> Yes <input type="checkbox"/> No                                                                                                                                                                                               |                                                                                                                                                                                                                                                                                                                                                                                                                                                                                                  |

**Table 2. General Knowledge about COVID-19**

|                                                                                                                                                                                                                                                                                                      |                                                                                                                                                                                                                                                                                                                                                     |           |                    |
|------------------------------------------------------------------------------------------------------------------------------------------------------------------------------------------------------------------------------------------------------------------------------------------------------|-----------------------------------------------------------------------------------------------------------------------------------------------------------------------------------------------------------------------------------------------------------------------------------------------------------------------------------------------------|-----------|--------------------|
| <b>What is COVID-19?</b><br><input checked="" type="checkbox"/> Virus <input type="checkbox"/> Bacteria<br><input type="checkbox"/> Parasite <input type="checkbox"/> Fungus<br><input type="checkbox"/> Immunodeficiency <input type="checkbox"/> Inherited<br><input type="checkbox"/> Do not know | <b>Do you know how long after being infected with COVID-19 can a person suffer from signs and symptoms?</b><br><input type="checkbox"/> 1 Minute to 1 Hour <input type="checkbox"/> 1 Hour to 2 Days<br><input checked="" type="checkbox"/> 2 Days to 2 weeks <input type="checkbox"/> 2 Weeks to 1Month<br><input type="checkbox"/> Over a 1 month |           |                    |
| <b>Can an infection with COVID-19 confer permanent immunity (once infected with COVID-19 you cannot contract another infection)?</b><br><input type="checkbox"/> Yes <input checked="" type="checkbox"/> No <input type="checkbox"/> Do not know                                                     |                                                                                                                                                                                                                                                                                                                                                     |           |                    |
| <b>Can COVID-19 cause severe illness and lead to death in elderly, chronically ill (hypertension, diabetes, asthma . . .), and those who have compromised immune systems?</b><br><input checked="" type="checkbox"/> Yes <input type="checkbox"/> No <input type="checkbox"/> Do not know            |                                                                                                                                                                                                                                                                                                                                                     |           |                    |
| <b>Can COVID-19 cause infertility?</b><br><input type="checkbox"/> Yes <input type="checkbox"/> No <input checked="" type="checkbox"/> Do not know                                                                                                                                                   |                                                                                                                                                                                                                                                                                                                                                     |           |                    |
| <b>Is COVID-19 teratogenic (i.e. cause malformations/abnormalities to an embryo/fetus)?</b><br><input type="checkbox"/> Yes <input checked="" type="checkbox"/> No <input type="checkbox"/> Do not know                                                                                              |                                                                                                                                                                                                                                                                                                                                                     |           |                    |
| <b>Treatment for COVID-19</b>                                                                                                                                                                                                                                                                        |                                                                                                                                                                                                                                                                                                                                                     |           |                    |
|                                                                                                                                                                                                                                                                                                      | <b>Yes</b>                                                                                                                                                                                                                                                                                                                                          | <b>No</b> | <b>Do Not Know</b> |
| <b>No treatment available</b>                                                                                                                                                                                                                                                                        | ✓                                                                                                                                                                                                                                                                                                                                                   |           |                    |
| <b>Antibiotics</b>                                                                                                                                                                                                                                                                                   |                                                                                                                                                                                                                                                                                                                                                     | ✓         |                    |
| <b>Ibuprofen</b>                                                                                                                                                                                                                                                                                     |                                                                                                                                                                                                                                                                                                                                                     | ✓         |                    |
| <b>Is there an available vaccine for COVID-19?</b><br><input type="checkbox"/> Yes <input checked="" type="checkbox"/> No <input type="checkbox"/> Do not know                                                                                                                                       |                                                                                                                                                                                                                                                                                                                                                     |           |                    |

6  
7

| <b>Table 3. Transmission Pathways</b>                                                                       |            |           |                    |
|-------------------------------------------------------------------------------------------------------------|------------|-----------|--------------------|
|                                                                                                             | <b>Yes</b> | <b>No</b> | <b>Do Not Know</b> |
| <b>Can COVID-19 be transmitted via respiratory droplets (coughing or sneezing) of infected individuals?</b> | ✓          |           |                    |
| <b>Can COVID-19 be transmitted after shaking-hands with an infected individual?</b>                         | ✓          |           |                    |

|                                                                                          |   |  |   |
|------------------------------------------------------------------------------------------|---|--|---|
| Can COVID-19 be transmitted after touching an infected individual's personal belongings? | ✓ |  |   |
| Can COVID-19 be transmitted from animals to humans?                                      |   |  | ✓ |
| Can COVID-19 be transmitted via undercooked food?                                        |   |  | ✓ |
| Can COVID-19 be transmitted via sexual contact?                                          |   |  | ✓ |
| Can COVID-19 be transmitted via vertical transmission (mother to fetus)?                 | ✓ |  |   |

**Table 4. Signs and Symptoms of COVID-19**

|                                                                            | True | False | Do Not Know |
|----------------------------------------------------------------------------|------|-------|-------------|
| Is fever/temperature among the signs and symptoms of COVID-19?             | ✓    |       |             |
| Is sneezing among the signs and symptoms of COVID-19?                      | ✓    |       |             |
| Is sore throat among the signs and symptoms of COVID-19?                   | ✓    |       |             |
| Is headache among the signs and symptoms of COVID-19?                      | ✓    |       |             |
| Is Chest pain among the signs and symptoms of COVID-19?                    | ✓    |       |             |
| Is body aches (generalized pain) among the signs and symptoms of COVID-19? | ✓    |       |             |
| Is fatigue among the signs and symptoms of COVID-19?                       | ✓    |       |             |
| Is diarrhea among the signs and symptoms of COVID-19?                      | ✓    |       |             |
| Is a runny nose among the signs and symptoms of COVID-19?                  | ✓    |       |             |
| Is dry cough among the signs and symptoms of COVID-19?                     | ✓    |       |             |
| Is productive cough among the signs and symptoms of COVID-19?              | ✓    |       |             |
| Is bleeding among the signs and symptoms of COVID-19?                      |      | ✓     |             |
| Can a person be infected with COVID-19 and have no signs and symptoms?     | ✓    |       |             |

**Table 5. Prevention Methods**

|                                                                                                                                                                                                                                                                                                                                                                                                                                       | True | False | Do Not Know |
|---------------------------------------------------------------------------------------------------------------------------------------------------------------------------------------------------------------------------------------------------------------------------------------------------------------------------------------------------------------------------------------------------------------------------------------|------|-------|-------------|
| Does wearing a face mask outside the home offer protection from COVID -19?                                                                                                                                                                                                                                                                                                                                                            | ✓    |       |             |
| Does washing hands with soap and water offer protection from COVID-19?                                                                                                                                                                                                                                                                                                                                                                | ✓    |       |             |
| Does avoiding crowded places offer protection from COVID -19?                                                                                                                                                                                                                                                                                                                                                                         | ✓    |       |             |
| Does the flu vaccine offer protection from COVID -19?                                                                                                                                                                                                                                                                                                                                                                                 |      | ✓     |             |
| Does staying at home offer protection from COVID -19?                                                                                                                                                                                                                                                                                                                                                                                 | ✓    |       |             |
| Does using hand sanitizer offer protection from COVID -19?                                                                                                                                                                                                                                                                                                                                                                            | ✓    |       |             |
| Does using bleach to clean household surfaces prevent COVID-19 infection?                                                                                                                                                                                                                                                                                                                                                             | ✓    |       |             |
| Does cleaning fruits and vegetables with soap and water offer protection from COVID-19?                                                                                                                                                                                                                                                                                                                                               | ✓    |       |             |
| Does cleaning surfaces with a mixture of Flash and bleach offer protection from COVID -19?                                                                                                                                                                                                                                                                                                                                            |      | ✓     |             |
| Does the quarantine of symptomatic individuals protect others from COVID -19?                                                                                                                                                                                                                                                                                                                                                         | ✓    |       |             |
| Do cumin, anise, and mint offer protection from COVID -19?                                                                                                                                                                                                                                                                                                                                                                            |      | ✓     |             |
| <b>What is your main source of information about COVID-19? (You may choose more than one option)</b><br><input type="checkbox"/> Internet (social media platforms)<br><input type="checkbox"/> Internet (Official websites like world health organization)<br><input type="checkbox"/> TV/Radio<br><input type="checkbox"/> Friends/Member of family<br><input type="checkbox"/> Magazines/Books<br><input type="checkbox"/> Lectures |      |       |             |
| <b>If you had new information about COVID-19 would you share it with friends and family to raise awareness?</b><br><input type="checkbox"/> Yes <input type="checkbox"/> No                                                                                                                                                                                                                                                           |      |       |             |

1  
2  
3  
4  
5  
6  
7  
8  
9  
10  
11  
12  
13  
14  
15  
16  
17  
18  
19  
20  
21  
22  
23  
24  
25  
26  
27  
28  
29  
30  
31  
32  
33  
34  
35  
36  
37  
38  
39  
40  
41  
42  
43  
44  
45  
46  
47  
48  
49  
50  
51  
52  
53  
54  
55  
56  
57  
58  
59  
60

12

For peer review only



## STROBE Statement—checklist of items that should be included in reports of observational studies

|                           | Item No | Recommendation                                                                                                                                                                                                                                                                                                                                                                                                                                                         | Page No.                            |
|---------------------------|---------|------------------------------------------------------------------------------------------------------------------------------------------------------------------------------------------------------------------------------------------------------------------------------------------------------------------------------------------------------------------------------------------------------------------------------------------------------------------------|-------------------------------------|
| <b>Title and abstract</b> | 1       | (a) Indicate the study's design with a commonly used term in the title or the abstract                                                                                                                                                                                                                                                                                                                                                                                 | 1                                   |
|                           |         | (b) Provide in the abstract an informative and balanced summary of what was done and what was found                                                                                                                                                                                                                                                                                                                                                                    | 2,3                                 |
| <b>Introduction</b>       |         |                                                                                                                                                                                                                                                                                                                                                                                                                                                                        |                                     |
| Background/rationale      | 2       | Explain the scientific background and rationale for the investigation being reported                                                                                                                                                                                                                                                                                                                                                                                   | 5,6                                 |
| Objectives                | 3       | State specific objectives, including any prespecified hypotheses                                                                                                                                                                                                                                                                                                                                                                                                       | 6                                   |
| <b>Methods</b>            |         |                                                                                                                                                                                                                                                                                                                                                                                                                                                                        |                                     |
| Study design              | 4       | Present key elements of study design early in the paper                                                                                                                                                                                                                                                                                                                                                                                                                | 6,7                                 |
| Setting                   | 5       | Describe the setting, locations, and relevant dates, including periods of recruitment, exposure, follow-up, and data collection                                                                                                                                                                                                                                                                                                                                        | 6,7                                 |
| Participants              | 6       | (a) <i>Cohort study</i> —Give the eligibility criteria, and the sources and methods of selection of participants. Describe methods of follow-up<br><i>Case-control study</i> —Give the eligibility criteria, and the sources and methods of case ascertainment and control selection. Give the rationale for the choice of cases and controls<br><i>Cross-sectional study</i> —Give the eligibility criteria, and the sources and methods of selection of participants | 6,7                                 |
|                           |         | (b) <i>Cohort study</i> —For matched studies, give matching criteria and number of exposed and unexposed<br><i>Case-control study</i> —For matched studies, give matching criteria and the number of controls per case                                                                                                                                                                                                                                                 | Not applicable                      |
| Variables                 | 7       | Clearly define all outcomes, exposures, predictors, potential confounders, and effect modifiers. Give diagnostic criteria, if applicable                                                                                                                                                                                                                                                                                                                               | -                                   |
| Data sources/measurement  | 8*      | For each variable of interest, give sources of data and details of methods of assessment (measurement). Describe comparability of assessment methods if there is more than one group                                                                                                                                                                                                                                                                                   | Not applicable                      |
| Bias                      | 9       | Describe any efforts to address potential sources of bias                                                                                                                                                                                                                                                                                                                                                                                                              | 7                                   |
| Study size                | 10      | Explain how the study size was arrived at                                                                                                                                                                                                                                                                                                                                                                                                                              | 7                                   |
| Quantitative variables    | 11      | Explain how quantitative variables were handled in the analyses. If applicable, describe which groupings were chosen and why                                                                                                                                                                                                                                                                                                                                           | 8                                   |
| Statistical methods       | 12      | (a) Describe all statistical methods, including those used to control for confounding                                                                                                                                                                                                                                                                                                                                                                                  | 8                                   |
|                           |         | (b) Describe any methods used to examine subgroups and interactions                                                                                                                                                                                                                                                                                                                                                                                                    | 8                                   |
|                           |         | (c) Explain how missing data were addressed                                                                                                                                                                                                                                                                                                                                                                                                                            | Not applicable<br>(no missing data) |
|                           |         | (d) <i>Cohort study</i> —If applicable, explain how loss to follow-up                                                                                                                                                                                                                                                                                                                                                                                                  | 8                                   |

1  
2 was addressed

3 *Case-control study*—If applicable, explain how matching of cases  
4 and controls was addressed

5 *Cross-sectional study*—If applicable, describe analytical methods  
6 taking account of sampling strategy

---

7  
8 € Describe any sensitivity analyses -  
9

10 Continued on next page  
11  
12  
13  
14  
15  
16  
17  
18  
19  
20  
21  
22  
23  
24  
25  
26  
27  
28  
29  
30  
31  
32  
33  
34  
35  
36  
37  
38  
39  
40  
41  
42  
43  
44  
45  
46  
47  
48  
49  
50  
51  
52  
53  
54  
55  
56  
57  
58  
59  
60

For peer review only

| <b>Results</b>           |     |                                                                                                                                                                                                              | <b>Page No.</b> |
|--------------------------|-----|--------------------------------------------------------------------------------------------------------------------------------------------------------------------------------------------------------------|-----------------|
| Participants             | 13* | (a) Report numbers of individuals at each stage of study—eg numbers potentially eligible, examined for eligibility, confirmed eligible, included in the study, completing follow-up, and analysed            | 9               |
|                          |     | (b) Give reasons for non-participation at each stage                                                                                                                                                         | -               |
|                          |     | (c) Consider use of a flow diagram                                                                                                                                                                           | -               |
| Descriptive data         | 14* | (a) Give characteristics of study participants (eg demographic, clinical, social) and information on exposures and potential confounders                                                                     | 9               |
|                          |     | (b) Indicate number of participants with missing data for each variable of interest                                                                                                                          | Not applicable  |
|                          |     | © <i>Cohort study</i> —Summarise follow-up time (eg, average and total amount)                                                                                                                               | Not applicable  |
| Outcome data             | 15* | <i>Cohort study</i> —Report numbers of outcome events or summary measures over time                                                                                                                          | -               |
|                          |     | <i>Case-control study</i> —Report numbers in each exposure category, or summary measures of exposure                                                                                                         | -               |
|                          |     | <i>Cross-sectional study</i> —Report numbers of outcome events or summary measures                                                                                                                           | 29-35           |
| Main results             | 16  | (a) Give unadjusted estimates and, if applicable, confounder-adjusted estimates and their precision (eg, 95% confidence interval). Make clear which confounders were adjusted for and why they were included | 34,35           |
|                          |     | (b) Report category boundaries when continuous variables were categorized                                                                                                                                    | 29-33           |
|                          |     | (c) If relevant, consider translating estimates of relative risk into absolute risk for a meaningful time period                                                                                             | Not applicable  |
| Other analyses           | 17  | Report other analyses done—eg analyses of subgroups and interactions, and sensitivity analyses                                                                                                               |                 |
| <b>Discussion</b>        |     |                                                                                                                                                                                                              |                 |
| Key results              | 18  | Summarise key results with reference to study objectives                                                                                                                                                     | 13-15           |
| Limitations              | 19  | Discuss limitations of the study, taking into account sources of potential bias or imprecision. Discuss both direction and magnitude of any potential bias                                                   | 16              |
| Interpretation           | 20  | Give a cautious overall interpretation of results considering objectives, limitations, multiplicity of analyses, results from similar studies, and other relevant evidence                                   | 17              |
| Generalisability         | 21  | Discuss the generalisability (external validity) of the study results                                                                                                                                        | 16              |
| <b>Other information</b> |     |                                                                                                                                                                                                              |                 |
| Funding                  | 22  | Give the source of funding and the role of the funders for the present study and, if applicable, for the original study on which the present article is based                                                | 17              |

\*Give information separately for cases and controls in case-control studies and, if applicable, for exposed and unexposed groups in cohort and cross-sectional studies.

**Note:** An Explanation and Elaboration article discusses each checklist item and gives methodological background and published examples of transparent reporting. The STROBE checklist is best used in conjunction with this article (freely available on the Web sites of PLoS Medicine at <http://www.plosmedicine.org/>, Annals of Internal Medicine at <http://www.annals.org/>, and Epidemiology at <http://www.epidem.com/>). Information on the STROBE Initiative is available at [www.strobe-statement.org](http://www.strobe-statement.org).

# BMJ Open

## A Crisis Within a Crisis: COVID-19 Knowledge and Awareness among the Syrian Population - a cross-sectional study

|                                 |                                                                                                                                                                                                                                                                                                   |
|---------------------------------|---------------------------------------------------------------------------------------------------------------------------------------------------------------------------------------------------------------------------------------------------------------------------------------------------|
| Journal:                        | <i>BMJ Open</i>                                                                                                                                                                                                                                                                                   |
| Manuscript ID                   | bmjopen-2020-043305.R3                                                                                                                                                                                                                                                                            |
| Article Type:                   | Original research                                                                                                                                                                                                                                                                                 |
| Date Submitted by the Author:   | 22-Mar-2021                                                                                                                                                                                                                                                                                       |
| Complete List of Authors:       | Mohsen, Fatema; Syrian Private University Faculty of Medicine, Bakkar, Batoul; Syrian Private University Faculty of Medicine Armashi, Humam; Syrian Private University Faculty of Medicine Aldaher, Nizar; Syrian Private University Faculty of Medicine; Damascus University Faculty of Medicine |
| <b>Primary Subject Heading</b>: | Public health                                                                                                                                                                                                                                                                                     |
| Secondary Subject Heading:      | Public health, Infectious diseases                                                                                                                                                                                                                                                                |
| Keywords:                       | Public health < INFECTIOUS DISEASES, PUBLIC HEALTH, COVID-19                                                                                                                                                                                                                                      |
|                                 |                                                                                                                                                                                                                                                                                                   |

SCHOLARONE™  
Manuscripts



I, the Submitting Author has the right to grant and does grant on behalf of all authors of the Work (as defined in the below author licence), an exclusive licence and/or a non-exclusive licence for contributions from authors who are: i) UK Crown employees; ii) where BMJ has agreed a CC-BY licence shall apply, and/or iii) in accordance with the terms applicable for US Federal Government officers or employees acting as part of their official duties; on a worldwide, perpetual, irrevocable, royalty-free basis to BMJ Publishing Group Ltd ("BMJ") its licensees and where the relevant Journal is co-owned by BMJ to the co-owners of the Journal, to publish the Work in this journal and any other BMJ products and to exploit all rights, as set out in our [licence](#).

The Submitting Author accepts and understands that any supply made under these terms is made by BMJ to the Submitting Author unless you are acting as an employee on behalf of your employer or a postgraduate student of an affiliated institution which is paying any applicable article publishing charge ("APC") for Open Access articles. Where the Submitting Author wishes to make the Work available on an Open Access basis (and intends to pay the relevant APC), the terms of reuse of such Open Access shall be governed by a Creative Commons licence – details of these licences and which [Creative Commons](#) licence will apply to this Work are set out in our licence referred to above.

Other than as permitted in any relevant BMJ Author's Self Archiving Policies, I confirm this Work has not been accepted for publication elsewhere, is not being considered for publication elsewhere and does not duplicate material already published. I confirm all authors consent to publication of this Work and authorise the granting of this licence.

1  
2  
3 1 **A Crisis Within a Crisis: COVID-19 Knowledge and Awareness among the**  
4  
5  
6 2 **Syrian Population - a cross-sectional study**  
7  
8  
9

10 3  
11  
12 4 **Authors: Fatema Mohsen<sup>1</sup>, Batoul Bakkar<sup>1</sup>, Humam Armashi<sup>1</sup>, Nizar Aldaher<sup>2,3</sup>**  
13  
14 5  
15  
16

17 6 **Affiliations:**

18  
19  
20  
21 7 1 Faculty of Medicine, Syrian Private University, Damascus, Syria.  
22

23 8 2 Professor in Infectious Diseases, Department of Internal Medicine, Faculty of Medicine,  
24  
25  
26 9 Damascus University, Damascus, Syria.

27  
28 10 3 Professor in Infectious Diseases, Department of Internal Medicine, Faculty of Medicine,  
29  
30  
31 11 Syrian Private University, Rif Dimashq, Syria.  
32

33 12  
34  
35  
36 13 **Corresponding Author:**

37  
38 14 Fatema Mohsen  
39

40  
41  
42 15 Faculty of Medicine, Syrian Private University, Mazzeh Street, P.O. Box 36822, Damascus,  
43

44 16 Syrian Arab Republic  
45

46  
47 17 Tel:00963936396590 Email: fatemamohsena@gmail.com  
48  
49

50 18  
51  
52  
53 19 **Abstract:**  
54  
55  
56  
57  
58  
59  
60

1  
2  
3 20 **Objectives:** To gauge specific knowledge around clinical features, transmission pathways, and  
4  
5 21 prevention methods, and to identify factors associated with poor knowledge to help facilitate  
6  
7 22 outbreak management in Syria during this rapid global rise of the COVID-19 pandemic.  
8  
9

10 23 **Design:** Web-based cross-sectional survey.  
11  
12

13 24 **Setting:** This study was conducted in March 2020, nearly 10 years into the Syrian war crisis.  
14  
15 25 The Arabic-language survey was posted on various social media platforms including  
16  
17 26 WhatsApp, Telegram, Instagram, and Facebook targeting various social groups.  
18  
19

20  
21 27 **Participants:** A total of 4495 participants completed the survey. Participants with a history of  
22  
23 28 COVID-19 infection, residing outside Syria, or who did not fully complete the survey were  
24  
25 29 excluded from the study. The final sample of 3586 participants (completion rate=79.8%)  
26  
27 30 consisted of 2444(68.2%) females and 1142(31.8%) males.  
28  
29

30 31 **Primary and secondary outcome measures:** The first, knowledge of COVID-19 in 4 areas  
31  
32 32 (1. general knowledge 2. transmission pathways 3. signs and symptoms 4. prevention  
33  
34 33 methods). The second, factors associated with poor knowledge.  
35  
36

37  
38 34 **Results:** Of the 3586 participants, 2444(68.2%) were female, 1822(50.8%) were unemployed,  
39  
40 35 and 2839(79.2%) were college-educated. The study revealed good awareness regarding  
41  
42 36 COVID-19 (mean 75.6%, SD±9.4%). Multiple linear regression analysis correlated poor mean  
43  
44 37 knowledge scores with male gender ( $\beta=-0.933$ ,  $p=0.005$ ), secondary school or lower education  
45  
46 38 level ( $\beta=-3.782$ ,  $p<0.001$ ), non-healthcare occupation ( $\beta=-3.592$ ,  $p<0.001$ ), low economic  
47  
48 39 status ( $\beta=-0.669$ ,  $p<0.040$ ), and >5 household members ( $\beta=-1.737$ ,  $p<0.001$ ).  
49  
50  
51  
52  
53  
54  
55  
56  
57  
58  
59  
60

1  
2  
3  
4 41 **Conclusion:** This study revealed some potentially troubling knowledge gaps which underscore  
5  
6 42 the need for a vigorous public education campaign in Syria. This campaign must reinforce the  
7  
8 43 public's awareness, knowledge, and vigilance towards precautionary measures against COVID-  
9  
10 44 19, and most importantly aid in controlling the worldwide spread of the disease.  
11  
12  
13 45

14  
15 46 **Strengths and limitations of this study:**

16  
17 47 . Data are derived from a large, national survey across Syria, during the lockdown period.  
18  
19

20  
21 48 . The survey covered socio-demographic information, general knowledge, transmission,  
22  
23 49 symptoms, and prevention.  
24  
25

26  
27 50 . Results have broad implications for public health programming and response to COVID-19  
28  
29 51 in Syria.  
30  
31

32  
33 52 . This web-based cross-sectional study cannot be generalized towards the Syrian population.  
34  
35 53

36  
37 54 **Keywords:** Awareness; Knowledge; COVID-19; Pandemic; Syria; War; Population.  
38  
39  
40  
41 55

42  
43  
44 56 **Background:**

45  
46  
47  
48 57 Coronavirus disease 2019 (COVID-19) is a highly infectious respiratory disease that  
49  
50 58 evolved into a worldwide pandemic, threatening a prolonged economic recession. The first  
51  
52 59 incidence was reported at a local seafood market in Wuhan, China.<sup>1</sup> The virus continues to  
53  
54 60 spread, with steadily increasing morbidity and mortality cases, hitting the poorest and most  
55  
56 61 vulnerable in the world. Many studies have assessed symptomatic clusters, transmission  
57  
58 62 pathways, and prevention methods; however, many aspects have yet to be studied.<sup>2 3</sup> Sexual  
59  
60



1  
2  
3 63 transmissions, horizontal transmission, animal to human transmission, permanent immunity,  
4  
5 64 and fetal abnormalities as a result of maternal infection are as yet unproven.  
6  
7

8 65 The battle against COVID-19 in Syria has just entered its third wave.<sup>4 5</sup> The first  
9  
10 66 confirmed case was announced on 22 March 2020,<sup>6</sup> and there had only been 44 cases and 3  
11  
12 67 deaths at the time of the study. These figures are significantly lower than neighbouring  
13  
14 68 countries such as Turkey (127,659 cases and 3,461 deaths), Iran (98,647 and 6,277), Iraq (2,346  
15  
16 69 and 98), Lebanon (740 and 25), and Jordan (465 and 9).<sup>7</sup> The Syrian healthcare system is  
17  
18 70 severely under-equipped and lacks the capacity to contain such a crisis. The estimated number  
19  
20 71 of intensive care unit (ICU) beds with ventilators is a mere 325, and the theoretical maximum  
21  
22 72 number of cases that can be adequately treated is only 6,500.<sup>8</sup> Once this maximum threshold  
23  
24 73 (capacity) is exceeded, drastic rationing decisions will have to be made. Therefore, cooperation  
25  
26 74 with and response to guidance from the WHO are of utmost importance. Unprecedented  
27  
28 75 measures have been adopted to control the spread of COVID-19 in Syria.<sup>8</sup> The public's  
29  
30 76 adherence to these control measures is largely affected by their awareness, knowledge, and  
31  
32 77 attitudes towards disease and outbreaks.<sup>9 10</sup>  
33  
34  
35  
36  
37

38 78 The Syrian conflict, now in its 10<sup>th</sup> year, has resulted in the worst refugee crisis since  
39  
40 79 World War II.<sup>11</sup> The devastating impact of war has placed the public health system under  
41  
42 80 constant strain; the numbers of casualties continue to rise, 70% of health care workers (HCW)  
43  
44 81 have fled the country, the annihilation of healthcare facilities, and the “weaponization” of  
45  
46 82 healthcare are ongoing challenges.<sup>8 12</sup> These challenges along with dense residential areas, the  
47  
48 83 growing prevalence of chronic illness, and 83% of the population living below the poverty line  
49  
50 84 make Syria highly vulnerable to a severe outbreak.<sup>8 13</sup>  
51  
52  
53

54 85 While some studies have been conducted to assess the knowledge, attitude, and  
55  
56 86 practices among populations during this pandemic, including one done in China, none have  
57  
58 87 been undertaken in Syria.<sup>14-21</sup> To our knowledge this first study which aims to measure the  
59  
60

1  
2  
3 88 awareness and general knowledge of COVID-19 among the Syrian population at a time where  
4  
5 89 ambiguity and misinformation are rampant. The objective of this study is to gauge specific  
6  
7 90 knowledge around clinical features, transmission pathways, and prevention methods, and to  
8  
9 91 identify factors associated with poor knowledge to help facilitate outbreak management in  
10  
11 92 Syria during this rapid global rise of the COVID-19 pandemic. The information gleaned from  
12  
13 93 this research will help with public health programming and response to COVID-19 in Syria as  
14  
15 94 the pandemic continues to unfold.  
16  
17  
18  
19  
20  
21  
22

## 23 96 **Methods:**

### 24 25 26 97 **Study design, setting, and participants:**

27  
28  
29 98 This web-based cross-sectional survey was conducted between March 31<sup>st</sup> and April 4<sup>th</sup>  
30  
31 99 of 2020, during the lockdown period. Ethical approval was obtained from the Institutional  
32  
33 100 Review Board (IRB) of the Faculty of Medicine, Syrian Private University. The inclusion  
34  
35 101 criteria for this study were participants residing in Syria who completed the survey and had no  
36  
37 102 known history of COVID-19 infection. The authors designed questions were modelled after  
38  
39 103 existing awareness surveys, WHO course materials, technical briefs, and question and answer  
40  
41 104 bank on COVID-19 related topics.<sup>14 15 22-25</sup> Questions from existing awareness surveys that did  
42  
43 105 not target community awareness regarding COVID-19 were excluded from the study.<sup>14 15</sup> The  
44  
45 106 survey was translated into Arabic and was reviewed by two dialectologists and two infectious  
46  
47 107 disease specialists, who evaluated whether the survey questions effectively assessed COVID-  
48  
49 108 19 knowledge, and checked for double-barrelled and confusing questions, to ascertain validity.  
50  
51 109 We conducted a pilot study on 20 volunteers to assess reliability, clarity, relevance, and the  
52  
53 110 acceptability of the survey. These volunteers were excluded from the final sample to avoid  
54  
55 111 bias. Modifications were made based on feedback received to facilitate better comprehension  
56  
57  
58  
59  
60

1  
2  
3 112 before distributing the final survey to the general population. The Arabic-language survey was  
4  
5 113 posted on various social media platforms including WhatsApp, Telegram, Instagram, and  
6  
7  
8 114 Facebook targeting various social groups. To avoid non-response bias the survey was  
9  
10 115 distributed during lockdown where the majority of the population were out of work and at  
11  
12 116 home. GIFs and posts were adapted to appeal to each social group; the questions were made  
13  
14 117 short and in the form of multiple choice questions that required no typing. The ability for  
15  
16  
17 118 viewers to comment on the link increased the popularity of the survey. Participants confirmed  
18  
19 119 their voluntary participation by answering a yes-no question, were informed of the option to  
20  
21 120 opt-out of the survey at any time, and were assured of the confidentiality and anonymity of  
22  
23  
24 121 their responses. After confirmation, participants were directed to the first part of the survey to  
25  
26 122 complete questions about socio-demographic information including; age, gender, residence,  
27  
28 123 education level, occupation, and economic status. Participants under the age of 18 required  
29  
30 124 informed parental consent, as well as submission of parent/guardian contact information. The  
31  
32  
33 125 researchers were responsible for contacting the parents/guardians to obtain consent before the  
34  
35 126 child was given access to the survey. The sample size calculated was 2401 participants based  
36  
37 127 on a margin of error of 2%, and a confidence interval of 95%, for a population of 18,284,423  
38  
39  
40 128 people using a sample size calculator (website: <https://www.surveysystem.com/sscalc.htm>).  
41  
42 129 The self-administered survey contained 40 questions divided into 4 sections: general  
43  
44 130 knowledge (10 questions), transmission pathways (7 questions), clinical features (12  
45  
46 131 questions), and prevention methods (11 questions). The survey is available in appendix 1.  
47  
48  
49

### 50 132 **Patient and public involvement:**

51  
52  
53 133 The public were not involved in the study design, conduct of the study, or plans to disseminate  
54  
55 134 the results to study participants.  
56  
57  
58  
59  
60

## 135 **Statistical analysis**

136 A scoring system was used to analyse the participants' knowledge: a score of "1" was  
137 given for a correct answer and a score of "0" was given for an incorrect answer. The correct  
138 answers to the survey were determined from previous surveys and available WHO resources.  
139 <sup>14 15 22-25</sup> The percentage score for mean knowledge was calculated as follows: sum of scores  
140 obtained/maximum scores that could be obtained  $\times 100$ . Participants' total mean knowledge in  
141 all the subsections, and mean knowledge of each subsection were calculated. Data were  
142 analysed using the Statistical Package for Social Sciences version 25.0 (SPSS Inc., Chicago,  
143 IL, United States) and reported as frequencies and percentages (for categorical variables) or  
144 means and standard deviations (SD) (for continuous variables). The t-test was applied to  
145 compare mean knowledge scores against both genders, and 3 questions (knowing an infected  
146 individual, use of personal belongings, and dissemination of knowledge). The t-test was applied  
147 to compare mean knowledge scores against gender. One-way analysis of variance (ANOVA)  
148 was applied using f-test to compare mean knowledge scores against socio-demographic  
149 variables (age, social status, residence, education level, occupation, economic status, and  
150 number of household members), and source of information. Multivariable linear regression  
151 analysis using the socio-demographic variables as independent variables (categorical) and  
152 mean knowledge score as the outcome variable (continuous) was conducted to identify factors  
153 associated with knowledge. Factors were selected with a backward method and were analysed  
154 using the unstandardized coefficient ( $\beta$ ), and 95% confidence interval. P-values $<0.05$  were  
155 considered statistically significant.

156

## 157 **Results:**

1  
2  
3 **158 Socio-demographics characteristics:**  
4  
5

6 **159** Of 4495 total participants who completed the survey, participants with a known history  
7  
8 **160** of COVID-19 infection, residing outside Syria, and who did not fully complete the survey were  
9  
10 **161** excluded. The final sample of 3586 participants (completion rate= 79.8%) consisted of  
11  
12 **162** 2444(68.2%) females and 1142(31.8%) males. Participants aged >20 years were the majority  
13  
14 **163** 1204(33.6%) while participants between 35 and 39 were the minority 186(5.2%). Participant  
15  
16 **164** ages ranged from 12-78 years with a mean of 30 ( $\pm 10$ ) years). 2279(63.6%) participants were  
17  
18 **165** single, 1822(50.8%) were unemployed, 1064(29.7%) were smokers, and 428(11.9%) were  
19  
20 **166** alcohol consumers (Table 1). The majority of participants were residents of Damascus/ Rural  
21  
22 **167** Damascus 2019(56.3%) and had attained college/university level education (Figure1).  
23  
24  
25  
26  
27

28 **168 General Knowledge regarding COVID-19:**  
29  
30

31 **169** Participants showed a good level of awareness regarding COVID-19 ( $75.6 \pm 9.4\%$ ). An  
32  
33 **170** adequate level of basic knowledge ( $67.0 \pm 18.9\%$ ) was found among participants, 3383(94.3%)  
34  
35 **171** knew that a virus was the causative agent of COVID-19; 2535(70.7%) correctly identified the  
36  
37 **172** incubation period as being between 2 days and 2 weeks. Only 1500(41.8%) believed that an  
38  
39 **173** infection with COVID-19 does not confer lifelong immunity. The majority of participants  
40  
41 **174** 3489(97.3%) were aware that COVID-19 infection in high-risk groups can be fatal. There is  
42  
43 **175** currently insufficient evidence on whether infertility is a complication of COVID-19 infection;  
44  
45 **176** 461(12.9%) participants believed that COVID-19 can cause infertility while 1903(53.0%) did  
46  
47 **177** not. 2986(83.3%), and 2597(72.4%) correctly answered that there are currently no available  
48  
49 **178** vaccine or treatments respectively; however, there were misconceptions about the efficacy of  
50  
51 **179** antibiotics and Ibuprofen as treatments, 1228(34.2%) and 1268(35.3%) respectively (Table 2).  
52  
53  
54  
55  
56  
57  
58  
59  
60

## 180 **Transmission, and Signs and Symptoms regarding COVID-19:**

181 There was a fair level of awareness ( $70.7 \pm 16.9\%$ ) regarding COVID-19 transmission  
182 pathways. A high level of awareness was demonstrated regarding common transmission  
183 pathways: 3521(98.2%), 3387(94.4%), and 3330(92.9%) identified respiratory droplets,  
184 touching an infected person's personal belongings, and handshaking respectively. There is  
185 currently limited evidence of animal-to-human and sexual transmission; 703(19.6%) did not  
186 know if transmission occurs between animals and humans, while 899(25.1%) did not know if  
187 the virus is transmitted sexually (Table 2).

188 The data showed a good level of awareness ( $76.0 \pm 13.6\%$ ) regarding clinical features.  
189 When asked about the main clinical features, participants correctly identified, fever  
190 3563(99.4%), sore throat 3037(84.7%), headache 3186(88.8%), chest pain 3050(85.0%),  
191 general pain 3019(84.2%), fatigue 3405(95.0%), and dry cough 3466(96.7%), whereas only  
192 1972(55.0%) knew that diarrhea can be a symptom. Only 2221(61.9%) were aware that  
193 infected individuals may be asymptomatic (Table 2).

## 194 **Prevention Methods regarding COVID-19:**

195 The highest level of awareness was in the prevention section ( $88.8 \pm 10.2\%$ ). Washing  
196 hands with soap, avoiding crowded areas, remaining at home, and wearing a face mask outside  
197 are the principal preventative measures against COVID-19, 3574(99.7%), 3574(99.75%),  
198 3554(99.1%), and 3204(89.3%), respectively. A minority of 158(4.4%) believed that cleaning  
199 with a mixture of Flash and bleach is a sound preventive measure. Only 2482(69.2%) knew  
200 that the flu vaccine offers no protection against COVID-19 (Table 2).

## 201 **Statistical Analysis of the Data:**

202 A series of one way ANOVA analyses revealed that mean knowledge differed  
203 significantly across: gender (p-value=0.009), age (p-value=0.003), social status (p-

1  
2  
3 204 value=0.042), education level (p-value<0.001), economic status (p-value<0.001), number of  
4  
5 205 household members (p-value<0.001), place of residence (p-value<0.001), and source of  
6  
7 206 information (p-value<0.001) (Table 3). Participants living in Lattakia (77.6%) exhibited the  
8  
9 207 greatest awareness, whereas those in Ar-Raqqah (71.7%) followed by Deir-ez-Zor (71.8%)  
10  
11 208 exhibited the lowest. The mean knowledge differed across groups that acquired information  
12  
13 209 from different sources, the lowest awareness was among participants who chose family  
14  
15 210 members/friends as one of their source(s) (74.0%), whereas those with the highest awareness  
16  
17 211 acquired their information from lectures as one of their source(s) (78.2%), (Table 3).  
18  
19  
20  
21

22 212 When participants were asked if they were likely to share new information with friends  
23  
24 213 and family, 3513(98.0%) answered “yes”. There was a significant difference in mean  
25  
26 214 knowledge between those who were inclined to disseminate new information about COVID-  
27  
28 215 19 to friends and family (75.7%) compared with those who were not (72.3%) (p-value=0.002).  
29  
30 216 On exclusive use of personal belongings, 2692(75.1%) answered “yes”. We found no  
31  
32 217 significant correlation between mean knowledge and participant tendency to share personal  
33  
34 218 belongings with others (p-value=0.112). Of participants who knew someone infected with  
35  
36 219 COVID-19, 65(1.8%) answered “yes”. There was no significant difference in mean knowledge  
37  
38 220 between those who knew an infected individual (75.9%) compared with those who did not  
39  
40 221 (75.6%) (p-value=0.816).  
41  
42  
43  
44

#### 45 222 **Multiple linear regression:**

46  
47  
48 223 Multiple linear regression analysis results: male gender (vs. female,  $\beta$ =-0.933, p=0.005);  
49  
50 224 education of secondary school or lower (vs. college/university and above,  $\beta$ =-3.782, p<0.001);  
51  
52 225 careers in government, private, business, military, and “other” sectors, as well as  
53  
54 226 unemployment (vs. health care workers,  $\beta$ =-3.592, p<0.001); poor and moderate economic  
55  
56 227 status (vs. good and excellent,  $\beta$ =-0.669, p<0.040); and over 5 household members (vs. of 1-5,  
57  
58  
59  
60



1  
2  
3 228  $\beta=-1.737$ ,  $p<0.001$ ) were associated with significantly poorer knowledge scores (Table 4).  
4  
5 229 Careers in health care (vs. Unemployed,  $\beta=3.592$ ,  $p\text{-value}=<0.001$ ), and the 31-45 age  
6  
7 230 group (vs. 16-30,  $\beta=1.511$ ,  $p\text{-value}=0.005$ ) were associated with significantly higher  
8  
9 231 knowledge scores.  
10  
11  
12

13 232  
14  
15

### 17 233 **Discussion:**

18  
19  
20 234 We found an overall mean knowledge score of 75.6%, indicating that most participants  
21  
22 235 were relatively knowledgeable about COVID-19, though less so compared to their counterparts  
23  
24 236 in China (90%).<sup>14</sup> This level of knowledge was unexpected given that only 10 cases of COVID-  
25  
26 237 19 had been confirmed in Syria at the time of the survey.<sup>26</sup>  
27  
28  
29

30 238 Poor knowledge was associated with males, non-post-secondary education, non-  
31  
32 239 healthcare occupations, unemployment, poor and moderate economic status, and households  
33  
34 240 with more than 5 members. Similar trends were observed in China.<sup>14</sup> Correlating socio-  
35  
36 241 demographic variables with awareness is critical to public health efforts to mitigate the spread  
37  
38 242 of COVID-19. The data obtained from this study can be leveraged by the Syrian Ministry of  
39  
40 243 Health to tailor prevention and educational campaigns to populations with the widest  
41  
42 244 knowledge gaps.  
43  
44  
45

46 245 Our study showed a relatively high level of awareness 2535(70.7%) among the  
47  
48 246 population. In the general knowledge section (mean knowledge score 67%), the majority of the  
49  
50 247 participants 3383(94.3%) knew that COVID-19 is caused by a virus. This was similar to a  
51  
52 248 Pakistani study (93.3%).<sup>19</sup> Low awareness of the 2-to-14 day incubation period was found<sup>27</sup>  
53  
54 249 among dentists (36.1%) and HCW (36.4%) in similar studies.<sup>15 21</sup> Syria has a relatively young  
55  
56 250 population. Statistical data from 2018 showed that only an estimated 4.5% of the population  
57  
58  
59  
60



1  
2  
3 251 was over the age of 65.<sup>28</sup> 3489(97.3%) knew that COVID-19 infection can be severe and  
4  
5 252 potentially fatal in elderly, chronically ill, and immunodeficient patients. This is higher than in  
6  
7 253 studies conducted in China (73.2%) and India (88.37%).<sup>14 29</sup> 40.6% of Syrians are hypertensive,  
8  
9  
10 254 yet a staggering 79.8% of them are unaware of their condition. Diabetes is also prevalent,  
11  
12 255 affecting 11.9% of the population.<sup>30 31</sup> Such a rampant lack of awareness about chronic diseases  
13  
14 256 associated with high mortality in COVID-19 patients underscores the need for targeted  
15  
16  
17 257 awareness campaigns.

18  
19  
20 258 At the time of the survey, no standardized evidence-based protocols had yet been  
21  
22 259 developed to treat COVID-19 infections; only 2597(72.4%) participants knew that there was  
23  
24 260 no available treatment at that time. This is higher than a Kenyan study (40%) but significantly  
25  
26 261 lower than a Chinese study (94%).<sup>14 17</sup> A minority 103(2.9%) of participants thought there was  
27  
28 262 a vaccine available against COVID-19, even though vaccines have only become commercially  
29  
30 263 available in the past few months. By contrast, Coimbatore District and Pakistan were less  
31  
32 264 informed, with (18.6%) and (11.6%) respectively believing that such a vaccine was available  
33  
34 265 at the time. In the absence of a vaccine or effective treatment protocol for COVID-19 at the  
35  
36 266 time of the survey, controlling the spread of the disease was the best line of defence, and  
37  
38 267 remains so given the dire shortage of medication, ventilators, ICU capacity, and the continued  
39  
40 268 lack of a vaccine available to the Syrian people. We observed a considerable knowledge gap  
41  
42 269 in 1268(35.3%) with regards to ibuprofen as a treatment option. There is no available evidence  
43  
44 270 to suggest that ibuprofen is effective against COVID-19.<sup>32</sup>

45  
46  
47  
48  
49  
50 271 Participants showed a fair level of awareness regarding transmission pathways (70.7%),  
51  
52 272 very similar to a Pakistani study (70.8%).<sup>19</sup> The majority 3521(98.2%) of participants were  
53  
54 273 aware that respiratory droplets are common transmission vectors; this is similar to a Chinese  
55  
56 274 study (97.8%), but much higher than an Indian study (29.5%).<sup>14 18</sup> 3330(92.9%) participants

1  
2  
3 275 identified handshaking as a transmission pathway, higher than a study among Jordanian  
4  
5 276 dentists (85.6%).<sup>15</sup>  
6  
7

8 277 The majority of survey participants were sufficiently aware of the clinical features of  
9  
10 278 COVID-19 (76.0%), similar to a Pakistani study (77.7%).<sup>19</sup> A very high level of awareness of  
11  
12 279 the most common symptoms was found: fever 3563(99.4%), dry cough 3466(96.7%), fatigue  
13  
14 280 3405(95.0%), and myalgia 3019(84.2%), similar to findings from Chinese (96.4%) and Indian  
15  
16 281 (95.4%) studies.<sup>14 29</sup> When asked about sore throat, a high level of awareness 3037(84.7%) was  
17  
18 282 found compared to studies from India (15.2%) and among dentists in Jordan (28.5%).<sup>15 18</sup>  
19  
20 283 Knowledge about diarrhea as a symptom was lacking: only 1972(55.0%); a study among  
21  
22 284 dentists also showed low awareness (39.9%).<sup>15 18</sup> While infected individuals are frequently  
23  
24 285 asymptomatic, or present with mild symptoms, around 1 in every 5 infections can be  
25  
26 286 serious enough to require hospitalisation.<sup>33 34</sup> Only 2221(61.9%) participants were aware that  
27  
28 287 infected individuals can be asymptomatic, while a study among dentists (34.5%) reported much  
29  
30 288 lower awareness. Increasing public awareness about the variability of symptoms is particularly  
31  
32 289 important since those with mild or unreported symptoms may significantly contribute to the  
33  
34 290 transmission of COVID-19. The lack of health insurance, paid sick leave, telecommuting, or  
35  
36 291 other social and professional safety nets increase the likelihood that these “silent spreaders”  
37  
38 292 will underreport symptoms for fear of being forced to miss work.  
39  
40  
41  
42  
43

44 293 We found a high level of awareness in the preventive methods section (88.8%), similar  
45  
46 294 to a Pakistani study (85%).<sup>19</sup> Hand hygiene has been known to be an important element of  
47  
48 295 infection control since the 14<sup>th</sup> century.<sup>35</sup> Implementing hand-washing techniques can break  
49  
50 296 the transmission cycle and reduce the risk of infection by 6%-44%.<sup>36</sup> Almost all 3574(99.7%)  
51  
52 297 participants were aware that washing hands with soap and water is an important preventive  
53  
54 298 measure against COVID-19. This finding is in accordance with studies from Joran (97.0%),  
55  
56 299 and India (96.2%, and 87%).<sup>15 18 21</sup>  
57  
58  
59  
60

1  
2  
3 300 This year the WHO recommended that the following mitigation measures be  
4  
5 301 implemented during the holy month of Ramadan: cancelling social and religious gatherings,  
6  
7 302 holding events outdoors for adequate ventilation, physical distancing of at least 1 meter  
8  
9 303 between people, and the use of technology to broadcast ceremonies on television.<sup>37 38</sup> The  
10  
11 304 majority 3574(99.7%) identified avoiding mass gatherings as a preventive measure; studies in  
12  
13 305 China (98.6%) and Coimbatore District (97.7%) reported similar awareness.<sup>14 29</sup> Cheap and  
14  
15 306 efficient interventions such as N95 (filtration capacity=95%) have a 91% effectiveness of  
16  
17 307 blocking pathogen transmission.<sup>39</sup> 3204(89.3%) participants considered wearing a face mask  
18  
19 308 when leaving home as an effective prevention method, compared with a Coimbatore District  
20  
21 309 study (93.02%).<sup>29</sup>

22  
23  
24  
25  
26 310 Since Syrian society is particularly vulnerable to COVID-19, this knowledge gap is  
27  
28 311 potentially dangerous and should be addressed to mitigate disease spread. Only 2482(69.2%)  
29  
30 312 knew that the flu vaccine offers no protection against COVID-19; this is similar to a  
31  
32 313 Coimbatore District study (67.4%), but lower than a study amongst HCWs (90.7%).<sup>21 29</sup>  
33  
34 314 3305(92.2%) were aware that individuals showing symptoms should quarantine themselves,  
35  
36 315 lower than in China (98.2%) and India (95.8%).<sup>14 18</sup>

37  
38  
39  
40 316 North-East Syria (NES) has a population of over 4 million people, 600,000 of whom  
41  
42 317 are internally displaced refugees, 100,000 of whom live in overcrowded camps: only 2 of  
43  
44 318 NES's 11 hospitals are currently functioning. NES consists of 3 governorates: Ar-Raqqah,  
45  
46 319 Deir-ez-Zor, and Al-Hasakah. With only 22 ICU beds, (18 in Al-Hasakah, 4 in Ar-Raqqah, and  
47  
48 320 none in Deir-ez-Zor), the maximum capacity threshold is only 80 COVID-19 cases. Ar-Raqqah  
49  
50 321 and Deir-ez-Zor, the most vulnerable governorates, also showed the lowest awareness in the  
51  
52 322 study (71.7%), and (71.8%). This is a potentially catastrophic situation, and a concern to the  
53  
54 323 international community, as an unmonitored, uncontrolled outbreak in NES can prolong the  
55  
56 324 global pandemic.

1  
2  
3 3254  
5 3266  
7  
8  
9 327 **Limitations:**

10  
11  
12 328 Our findings may not be generalized to the wider Syrian population. The authors used  
13  
14 329 a convenience sampling strategy involving various social media platforms. Credible  
15  
16 330 published national data regarding the socio-demographic characteristics of Syrians are not  
17  
18 331 available to evaluate the representativeness of our sample. Syrians vulnerable to COVID-19,  
19  
20 332 such as the elderly and rural residents, are more likely to exhibit poor knowledge and  
21  
22 333 awareness due to limited internet access. As such, reaching out to these populations must be  
23  
24 334 prioritized. Even though all Syrian governorates were represented in this study, most  
25  
26 335 participants lived in Damascus and Rural Damascus. Furthermore, an assessment of the  
27  
28 336 Syrian population's practices relating to COVID-19 and the attitudes driving them is  
29  
30 337 necessary to complete the picture.  
31  
32  
33  
34  
35  
36  
37  
38  
39

40 339 **Conclusion:**

41  
42  
43 340 COVID-19 has been a dire warning to humanity about the fragility of its social,  
44  
45 341 economic, and healthcare institutions. Our study revealed good public awareness of clinical  
46  
47 342 features and preventive measures. However general knowledge and knowledge about  
48  
49 343 transmission pathways was suboptimal. Syrians of good socio-economic status, in particular  
50  
51 344 young well-educated women, have shown good knowledge. Our national response must adapt  
52  
53 345 to the growing threat of COVID-19 by adopting public awareness strategies and behaviours to  
54  
55 346 contain the disease both within and beyond our borders.  
56  
57  
58  
59  
60

1  
2  
3 348 **Abbreviations:** COVID-19: Coronavirus Disease 2019; MERS: Middle East Respiratory  
4  
5 349 Syndrome; SARS: Severe Acute Respiratory Syndrome; WHO: World Health Organization;  
6  
7 350 PHEIC: Public Health Emergency of International Concern; ICU: Intensive care unit; IRB:  
8  
9 351 Institutional Review Board; SPSS: Statistical Package for Social Sciences; SD: Standard  
10  
11 352 Deviation; HCW: Health Care Worker.  
12  
13  
14  
15  
16 353  
17  
18  
19  
20 354 **Acknowledgments:**  
21  
22  
23 355 We are thankful to the management of the Syrian Private University for the support in  
24  
25 356 the field of medical training and research. We are thankful to everyone who participated in this  
26  
27 357 study and to Mrs. Marah Marrawi for her statistical help. We would also like to thank Mr Rod  
28  
29 358 Usher for his valuable comments on the paper.  
30  
31  
32 359  
33  
34  
35  
36 360 **Funding:**  
37  
38  
39 361 This research received no specific grant from SPU or any other funding agency in the  
40  
41 362 public, commercial or non-profit sectors.  
42  
43 363  
44  
45  
46  
47 364 **Availability of data and materials:**  
48  
49  
50 365 All data related to this paper's conclusion are available and stored by the authors. All  
51  
52 366 data are available from the corresponding author on a reasonable request.  
53  
54  
55 367  
56  
57  
58 368 **Declarations:**  
59  
60

1  
2  
3 369 **Ethics approval and consent to participate:**

4 370 This study was approved by the Institutional Review Board (IRB) at the Syrian Private  
5  
6  
7 371 University (SPU). The IRB at SPU did not provide us with a number/ID. All Participants  
8  
9 372 confirmed their written consent by answering a yes-no question. Participants under the age of  
10  
11 373 18 required verbal informed parental consent, as well as submission of parent/guardian contact  
12  
13 374 information. The researchers were responsible for contacting the parents/guardians to obtain  
14  
15 375 verbal consent before the child was given access to the survey. The verbal and written form of  
16  
17 376 consent was approved by the IRB at SPU. Participation in the study was voluntary and  
18  
19 377 participants were assured that anyone who was not inclined to participate or decided to  
20  
21 378 withdraw after giving consent would not be victimized. All information collected from this  
22  
23 379 study was kept strictly confidential.

24  
25  
26  
27  
28 380 **Consent for Publication:**

29 381 Not applicable.

30  
31 382 **Competing interests:**

32 383 The authors declare that they have no competing interests.

33  
34  
35 384 **Authors' contributions:**

36 385 FM conceptualized the study, participated in the design, wrote the study protocol,  
37  
38 386 performed the statistical analysis, did a literature search, and drafted the manuscript. BB  
39  
40 387 participated in study design, did a literature search, and drafted the manuscript. HA, and NA  
41  
42 388 did a literature search and revision of the draft. All authors read and approved the final draft.  
43  
44  
45  
46

47 389

48  
49  
50 390 **Tables and Figures:**

51  
52 391 **Table 1.**

53 392

54  
55  
56  
57 **Table 1. Socio-demographic characteristics: (n=3586)**  
58  
59  
60

|                          |                          |                   |                      |                            |                               |                  |
|--------------------------|--------------------------|-------------------|----------------------|----------------------------|-------------------------------|------------------|
| <b>Gender (%)</b>        | <b>Male</b>              | <b>1142(31.8)</b> | <b>Education (%)</b> | <b>Primary School</b>      | <b>25(0.7)</b>                |                  |
|                          | <b>Female</b>            | <b>2444(68.2)</b> |                      | <b>Intermediate School</b> | <b>166(4.6)</b>               |                  |
| <b>Age (%)</b>           | <b>&lt;20</b>            | <b>1204(33.6)</b> |                      | <b>Secondary school</b>    | <b>375(10.4)</b>              |                  |
|                          | <b>20-24</b>             | <b>1104(30.8)</b> |                      | <b>College/University</b>  | <b>2839(79.2)</b>             |                  |
|                          | <b>25-29</b>             | <b>446(12.4)</b>  |                      | <b>Master's degree</b>     | <b>157(4.4)</b>               |                  |
|                          | <b>30-34</b>             | <b>266(7.4)</b>   |                      | <b>PhD</b>                 | <b>24(0.7)</b>                |                  |
|                          | <b>35-39</b>             | <b>186(5.2)</b>   |                      | <b>Occupation (%)</b>      | <b>Health care worker</b>     | <b>634(17.7)</b> |
|                          | <b>&gt;39</b>            | <b>380(10.6)</b>  |                      |                            | <b>Government institution</b> | <b>283(7.9)</b>  |
| <b>Social Status (%)</b> | <b>Single</b>            | <b>2279(63.5)</b> |                      |                            | <b>Private institution</b>    | <b>182(5.1)</b>  |
|                          | <b>In a relationship</b> | <b>286(8.0)</b>   |                      | <b>Business</b>            | <b>198(5.5)</b>               |                  |
|                          | <b>Married</b>           | <b>943(26.3)</b>  |                      | <b>Military</b>            | <b>32(0.9)</b>                |                  |

|                            |                   |                   |                              |                   |                   |
|----------------------------|-------------------|-------------------|------------------------------|-------------------|-------------------|
|                            | <b>Divorced</b>   | <b>46(1.3)</b>    |                              | <b>Unemployed</b> | <b>1822(50.8)</b> |
|                            | <b>Widowed</b>    | <b>32(0.9)</b>    |                              | <b>Other</b>      | <b>435(12.1)</b>  |
| <b>Economic Status (%)</b> | <b>1Poor</b>      | <b>247(6.9)</b>   | <b>Household members (%)</b> | <b>0</b>          | <b>46(1.3)</b>    |
|                            | <b>2Moderate</b>  | <b>1247(34.8)</b> |                              | <b>1-5</b>        | <b>2751(76.7)</b> |
|                            | <b>3Good</b>      | <b>1761(49.1)</b> |                              | <b>&gt;5</b>      | <b>789(22)</b>    |
|                            | <b>4Excellent</b> | <b>331(9.2)</b>   |                              |                   |                   |

393

394 <sup>1</sup>Poor: income does not provide essential needs for the family. <sup>2</sup>Moderate: income provides essential  
 395 needs for the family but no more. <sup>3</sup>Good: income provides essential needs and some luxury  
 396 requirements. <sup>4</sup>Excellent: income provides luxury requirements.

397

398 **Table 2.**

399

400

**Table 2. General Knowledge, Transmission, Signs and Symptoms, and Prevention of COVID-19: (n=3586)**

| <b>General Knowledge</b>              |          |            |                                         |                       |         |
|---------------------------------------|----------|------------|-----------------------------------------|-----------------------|---------|
| <b>Causative Agent</b><br><b>N(%)</b> | Virus    | 3383(94.3) | <b>Incubation period</b><br><b>N(%)</b> | 1 Minute to<br>1 Hour | 18(0.5) |
|                                       | Bacteria | 39(1.1)    |                                         | 1 Hour to             | 58(1.6) |



|                                                                                                                       |                   |               |              |                       |            |
|-----------------------------------------------------------------------------------------------------------------------|-------------------|---------------|--------------|-----------------------|------------|
|                                                                                                                       |                   |               |              | 2 Days                |            |
|                                                                                                                       | Parasite          | 8(0.2)        |              | 2 Days to 2 Weeks     | 2535(70.7) |
|                                                                                                                       | Immune deficiency | 46(1.3)       |              |                       |            |
|                                                                                                                       | Fungus            | 0(0.0)        |              | 2 Weeks to 1 Month    | 958(26.7)  |
|                                                                                                                       | Inherited         | 2(0.1)        |              |                       |            |
|                                                                                                                       | Do Not Know       | 108(3.0)      |              | >1 Month              | 17(0.5)    |
|                                                                                                                       |                   | <b>YES(%)</b> | <b>NO(%)</b> | <b>DO NOT KNOW(%)</b> |            |
| <b>Can infection with COVID-19 confer permanent immunity?</b>                                                         |                   | 815(22.7)     | 1500(41.8)   | 1271(35.5)            |            |
| <b>Can COVID-19 cause severe illness and lead to death in elderly, chronically ill, and immunodeficient patients?</b> |                   | 3489(97.3)    | 28(0.8)      | 69(1.9)               |            |
| <b>Can COVID-19 cause infertility?</b>                                                                                |                   | 461(12.9)     | 1222(34.1)   | 1903(53.0)            |            |
| <b>Is COVID-19 teratogenic (i.e. cause malformations/ abnormalities to an embryo/fetus)?</b>                          |                   | 157(4.4)      | 1433(40.0)   | 1996(55.6)            |            |
| <b>Is there no available treatment against COVID-19?</b>                                                              |                   | 2597(72.4)    | 515(14.4)    | 474(13.2)             |            |

|                                                          |            |            |            |
|----------------------------------------------------------|------------|------------|------------|
| <b>Can COVID-19 be treated with antibiotics?</b>         | 1228(34.3) | 1790(49.9) | 568(15.8)  |
| <b>Can COVID-19 be treated with Ibuprofen?</b>           | 1268(35.3) | 1921(53.6) | 397(11.1)  |
| <b>Are there available COVID-19 vaccines?</b>            | 103(2.9)   | 2986(83.3) | 497(13.8)  |
| <b>Transmission Pathways</b>                             |            |            |            |
| <b>Respiratory droplets (from coughing or sneezing)</b>  | 3521(98.2) | 21(0.6)    | 44(1.2)    |
| <b>Handshaking</b>                                       | 3330(92.9) | 189(5.3)   | 67(1.8)    |
| <b>Touching an infected person's personal belongings</b> | 3387(94.4) | 131(3.7)   | 68(1.9)    |
| <b>Animals-to-human</b>                                  | 910(25.4)  | 1973(55.0) | 703(19.6)  |
| <b>Undercooked food</b>                                  | 1301(36.3) | 1734(48.3) | 551(15.4)  |
| <b>Sexual contact</b>                                    | 1210(33.7) | 1477(41.2) | 899(25.1)  |
| <b>Horizontal transmission</b>                           | 1130(31.5) | 1160(32.4) | 1296(36.1) |
| <b>Signs and Symptoms</b>                                |            |            |            |
| <b>Fever</b>                                             | 3563(99.4) | 9(0.2)     | 14(0.4)    |
| <b>Sneezing</b>                                          | 2353(65.6) | 1000(27.9) | 233(6.5)   |
| <b>Sore throat</b>                                       | 3037(84.7) | 358(10.0)  | 191(5.3)   |

|                                                                                  |            |            |           |
|----------------------------------------------------------------------------------|------------|------------|-----------|
| <b>Headache</b>                                                                  | 3186(88.8) | 190(5.3)   | 210(5.9)  |
| <b>Chest pain</b>                                                                | 3050(85.0) | 254(7.1)   | 282(7.9)  |
| <b>Body aches (generalized pain)</b>                                             | 3019(84.2) | 260(7.2)   | 307(8.6)  |
| <b>Fatigue</b>                                                                   | 3405(95.0) | 72(2.0)    | 109(3.0)  |
| <b>Diarrhea</b>                                                                  | 1972(55.0) | 971(27.1)  | 643(17.9) |
| <b>Dry cough</b>                                                                 | 3466(96.7) | 44(1.2)    | 76(2.1)   |
| <b>Productive cough</b>                                                          | 458(12.8)  | 2586(72.1) | 542(15.1) |
| <b>Bleeding</b>                                                                  | 130(3.6)   | 2613(72.9) | 843(23.5) |
| <b>Asymptomatic</b>                                                              | 2221(61.9) | 375(10.5)  | 990(27.6) |
| <b>Prevention Methods</b>                                                        |            |            |           |
| <b>Does wearing a face mask outside the home offer protection from COVID-19?</b> | 3204(89.3) | 314(8.8)   | 68(1.9)   |
| <b>Does washing hands with soap and water offer protection from COVID-19?</b>    | 3574(99.7) | 5(0.1)     | 7(0.2)    |
| <b>Does avoiding crowded places offer protection from COVID-19?</b>              | 3574(99.7) | 4(0.1)     | 8(0.2)    |
| <b>Does the flu vaccine offer protection from COVID-19?</b>                      | 331(9.2)   | 2482(69.2) | 773(21.6) |

|                                                                                                  |            |            |           |
|--------------------------------------------------------------------------------------------------|------------|------------|-----------|
| Does staying at home offer protection from COVID-19?                                             | 3554(99.1) | 15(0.4)    | 17(0.5)   |
| Does using hand sanitizer offer protection from COVID-19?                                        | 3430(95.6) | 104(2.9)   | 52(1.5)   |
| Does cleaning household surfaces with bleach offer protection from COVID-19?                     | 3408(95.0) | 110(3.1)   | 68(1.9)   |
| Does cleaning fruits and vegetables with soap and water offer protection from COVID-19?          | 3262(90.9) | 221(6.2)   | 103(2.9)  |
| Does cleaning surfaces with a mixture of Flash and bleach offer a safe protection from COVID-19? | 158(4.4)   | 3301(92.1) | 127(3.5)  |
| Does the quarantine of symptomatic individuals protect others from COVID-19?                     | 3305(92.2) | 241(6.7)   | 40(1.1)   |
| Do cumin, anise, and mint offer protection from COVID-19?                                        | 1041(29.0) | 1934(53.9) | 611(17.1) |

401 **Table 3.**

**Table 3. Mean knowledge score of participants by demographic variables, and source of information (one way ANOVA), (n= 3586)**

| Characteristics          |        | Number of participants (%) | Mean Knowledge Score ( $\pm$ SD%) | F-test/ T-test | P-value |
|--------------------------|--------|----------------------------|-----------------------------------|----------------|---------|
| <b>Gender</b>            | Male   | 1142(31.8)                 | 75.0( $\pm$ 10.1)                 | -2.625         | 0.009*  |
|                          | Female | 2444(68.2)                 | 75.9( $\pm$ 9)                    |                |         |
| <b>Age-group (years)</b> | <20    | 1204(33.6)                 | 75.0( $\pm$ 9.9)                  | 2.990          | 0.011*  |
|                          | 20-24  | 1104(30.8)                 | 76.4( $\pm$ 9.3)                  |                |         |
|                          | 25-29  | 446(12.4)                  | 76.0( $\pm$ 9.4)                  |                |         |
|                          | 30-34  | 266(7.4)                   | 75.4( $\pm$ 9.4)                  |                |         |
|                          | 35-39  | 186(5.2)                   | 76.1( $\pm$ 7.6)                  |                |         |
|                          | >39    | 380(10.6)                  | 75.1( $\pm$ 8.6)                  |                |         |
| <b>Social</b>            | Single | 2279(63.5)                 | 75.8( $\pm$ 9.3)                  | 2.485          | 0.042*  |

|                  |                     |            |             |        |         |
|------------------|---------------------|------------|-------------|--------|---------|
| <b>status</b>    | In a relationship   | 286(8.0)   | 76.6(±8.6)  |        |         |
|                  | Married             | 943(26.3)  | 75.1(±9.4)  |        |         |
|                  | Divorced            | 46(1.3)    | 73.9(±8.8)  |        |         |
|                  | Widowed             | 32(0.9)    | 73.4(±15.9) |        |         |
| <b>Residence</b> | Urban               | 2426(67.7) | 75.8(±9.3)  | 1.652  | 0.099   |
|                  | Rural               | 1160(32.3) | 75.3(±9.6)  |        |         |
| <b>Education</b> | Primary school      | 25(0.7)    | 66.5(±12.4) | 26.176 | <0.001* |
|                  | Intermediate school | 166(4.6)   | 73.2(±9.3)  |        |         |
|                  | Secondary school    | 375(10.4)  | 70.0(±13)   |        |         |
|                  | College/University  | 2839(79.2) | 76.3(±8.9)  |        |         |

|                   |                        |            |             |        |         |
|-------------------|------------------------|------------|-------------|--------|---------|
|                   | Master's degree        | 157(4.4)   | 77.2(±9.7)  |        |         |
|                   | PhD                    | 24(0.7)    | 76.6(±8.5)  |        |         |
| <b>Occupation</b> | Health care worker     | 634(17.7)  | 78.6(±8.6)  | 16.379 | <0.001* |
|                   | Government institution | 283(7.9)   | 75.7(±7.9)  |        |         |
|                   | Private institution    | 182(5.1)   | 75.5(±9)    |        |         |
|                   | Business               | 198(5.5)   | 73.4(±10.2) |        |         |
|                   | Military               | 32(0.9)    | 71.2(±15.6) |        |         |
|                   | Unemployed             | 1822(50.8) | 75.3(±9.2)  |        |         |

|                              |                 |             |             |        |         |
|------------------------------|-----------------|-------------|-------------|--------|---------|
|                              |                 |             |             |        |         |
|                              | Other           | 435(12.1)   | 74.0(±10.2) |        |         |
| <b>Economic status</b>       | Excellent       | 331(9.2)    | 76.6(±11.1) | 7.108  | <0.001* |
|                              | Good            | 1761(49.1)  | 76.2(±9.4)  |        |         |
|                              | Moderate        | 1247(34.8)  | 74.9(±9)    |        |         |
|                              | Poor            | 247(6.9)    | 74.3(±9.3)  |        |         |
| <b>Household members</b>     | 0               | 46(1.3)     | 74.4(±10.6) | 15.451 | <0.001* |
|                              | 1-5             | 2751(76.7)  | 76.1(±9)    |        |         |
|                              | >5              | 789(22.0)   | 74.0(±10.2) |        |         |
| <b>Source of information</b> | Health websites | 2823(78.7%) | 76.4(±8.7)  | 24.523 | <0.001* |
|                              | Social media    | 1998(55.7%) | 74.6(±9.6)  |        |         |



|  |                            |             |             |  |  |
|--|----------------------------|-------------|-------------|--|--|
|  | Television/ radio          | 1572(43.8%) | 75.5(±9)    |  |  |
|  | Family members/<br>friends | 528(14.7%)  | 74.0(±10.3) |  |  |
|  | Lectures                   | 517(14.4%)  | 78.2(±7.5)  |  |  |
|  | Magazines/ books           | 266(7.4%)   | 77.6(±8.8)  |  |  |

402

403

**Table 4.**

**Table 4.** Multiple linear regression on variables associated with poor COVID-19 knowledge

| Variable                                                                               | Coefficient | Standard<br>error | t      | P       |
|----------------------------------------------------------------------------------------|-------------|-------------------|--------|---------|
| Male gender (reference: female)                                                        | -0.933      | 0.334             | -2.794 | 0.005*  |
| education of secondary school or<br>lower (reference: college/university<br>and above) | -3.782      | 0.466             | -8.125 | <0.001* |

|                                                                                                                                   |        |       |        |         |
|-----------------------------------------------------------------------------------------------------------------------------------|--------|-------|--------|---------|
| careers in government, private, business, military, and “other” sectors, as well as unemployment (reference: health care workers) | -3.592 | 0.474 | -7.579 | <0.001* |
| poor and moderate economic status (reference: good and excellent)                                                                 | -0.669 | 0.325 | -2.057 | 0.040*  |
| >5 household members (reference: of 1-5)                                                                                          | -1.737 | 0.374 | -4.648 | <0.001* |

404

#### 405 **Figures and tables legends:**

406 **Table 1.** Sociodemographic characteristics

407 **Table 2.** General Knowledge, Transmission, Signs and Symptoms, and Prevention around  
408 COVID-19

409 **Table 3.** Mean knowledge score of participants by demographic variables

410 **Table 4.** Multiple linear regression on variables associated with poor COVID-19 knowledge

411 **Figure 1.** Distribution of participants according to governorates and education level

412

#### 413 **References:**

- 414 1. Huang C, Wang Y, Li X, et al. Clinical features of patients infected with 2019 novel coronavirus in  
415 Wuhan, China. *The Lancet* 2020;395(10223):497-506. doi: 10.1016/s0140-6736(20)30183-5
- 416 2. Viner RM, Ward JL, Hudson LD, et al. Systematic review of reviews of symptoms and signs of  
417 COVID-19 in children and adolescents. 2020
- 418 3. Rahman HS, Aziz MS, Hussein RH, et al. The transmission modes and sources of COVID-19: A  
419 systematic review. 2020

1  
2  
3  
4  
5  
6  
7  
8  
9  
10  
11  
12  
13  
14  
15  
16  
17  
18  
19  
20  
21  
22  
23  
24  
25  
26  
27  
28  
29  
30  
31  
32  
33  
34  
35  
36  
37  
38  
39  
40  
41  
42  
43  
44  
45  
46  
47  
48  
49  
50  
51  
52  
53  
54  
55  
56  
57  
58  
59  
60

- 420 4. Affairs UOfCoH, Organization WH. Syrian Arab Republic: COVID-19 Humanitarian Update No. 23
- 421 As of 1 February 2021. *World Health Organization* 2021
- 422 5. Al-awsat A. Syria Grapples with Third COVID-19 Wave. *Alsharq Al-awsat* 2021
- 423 6. McKernan B. Syria confirms first Covid-19 case amid fears of catastrophic spread. *The Guardian*
- 424 2020
- 425 7. Organization WH. Coronavirus disease 2019 (COVID-19): situation report, 106. 2020
- 426 8. Gharibah M, Mehchy Z. COVID-19 pandemic: Syria's response and healthcare capacity. 2020
- 427 9. Ajilore K, Atakiti I, Onyenankya K. College students' knowledge, attitudes and adherence to
- 428 public service announcements on Ebola in Nigeria: Suggestions for improving future Ebola
- 429 prevention education programmes. *Health Education Journal* 2017;76(6):648-60.
- 430 10. Tachfouti N, Slama K, Berraho M, et al. The impact of knowledge and attitudes on adherence to
- 431 tuberculosis treatment: a case-control study in a Moroccan region. *Pan African Medical*
- 432 *Journal* 2012;12(1)
- 433 11. McNatt Z, Boothby NG, Al-Shannaq H, et al. Impact of Separation on Refugee Families: Syrian
- 434 Refugees in Jordan. 2018
- 435 12. Syria anniversary press release. *United Nations Office for the Coordination of Humanitarian*
- 436 *Affairs (OCHA)* 2020
- 437 13. UNICEF Syria Crisis Situation Report 2019
- 438 14. Zhong B-L, Luo W, Li H-M, et al. Knowledge, attitudes, and practices towards COVID-19 among
- 439 Chinese residents during the rapid rise period of the COVID-19 outbreak: a quick online
- 440 cross-sectional survey. *International Journal of Biological Sciences* 2020;16(10):1745.
- 441 15. Khader Y, Al Nsour M, Al-Batayneh OB, et al. Dentists' Awareness, Perception, and Attitude
- 442 Regarding COVID-19 and Infection Control: Cross-Sectional Study Among Jordanian Dentists.
- 443 *JMIR Public Health and Surveillance* 2020;6(2):e18798.
- 444 16. Qarawi A, Ng SJ, Gad A, et al. Awareness and Preparedness of Hospital Staff against Novel
- 445 Coronavirus (COVID-2019): A Global Survey - Study Protocol. *SSRN Electronic Journal* 2020
- 446 doi: 10.2139/ssrn.3550294
- 447 17. Austrian K, Pinchoff J, Tidwell JB, et al. COVID-19 related knowledge, attitudes, practices and
- 448 needs of households in informal settlements in Nairobi, Kenya. 2020
- 449 18. Roy D, Tripathy S, Kar SK, et al. Study of knowledge, attitude, anxiety & perceived mental
- 450 healthcare need in Indian population during COVID-19 pandemic. *Asian Journal of Psychiatry*
- 451 2020:102083.
- 452 19. Hussain T, Khan S, Gilani U, et al. Evaluation of General Awareness Among Professionals
- 453 Regarding COVID-19: A Survey Based Study from Pakistan. 2020
- 454 20. Zhou M, Tang F, Wang Y, et al. Knowledge, attitude and practice regarding COVID-19 among
- 455 health care workers in Henan, China. *Journal of Hospital Infection* 2020
- 456 21. Bhagavathula AS, Aldhaleei WA, Rahmani J, et al. Novel Coronavirus (COVID-19) Knowledge and
- 457 Perceptions: A Survey on Healthcare workers. *medRxiv* 2020
- 458 22. Organization WH. Introduction to COVID-19: methods for detection, prevention, response and
- 459 control. 2020
- 460 23. Organization WH. Q&As on COVID-19 and related health topics.
- 461 24. Organization WH. Water, sanitation, hygiene and waste management for COVID-19: technical
- 462 brief, 03 March 2020: World Health Organization, 2020.
- 463 25. Organization WH. Key planning recommendations for mass gatherings in the context of COVID-
- 464 19: interim guidance, 19 March 2020: World Health Organization, 2020.
- 465 26. Organization WH. Coronavirus disease 2019 (COVID-19): situation report, 71. 2020
- 466 27. Backer J, Klinkenberg D, Wallinga J. Incubation period of 2019 novel coronavirus (2019-nCoV)
- 467 infections among travellers from Wuhan, China, 20–28 January 2020. *Eurosurveillance*
- 468 2020;25 doi: 10.2807/1560-7917.ES.2020.25.5.2000062
- 469 28. Plecher H. Age structure in Syria 2018. *Statista* 2020

- 1  
2  
3 470 29. Vadivu TS, Annamuthu P. An Awareness and Perception of COVID-19 among General Public—A  
4 471 Cross Sectional Analysis. 2014  
5 472 30. Organization WH. Web World Health Organization—Diabetes country profiles: Diakses, 2016.  
6 473 31. Tailakh A, Evangelista LS, Mentos JC, et al. Hypertension prevalence, awareness, and control in A  
7 474 rab countries: A systematic review. *Nursing & health sciences* 2014;16(1):126-30.  
8 475 32. The use of non-steroidal anti-inflammatory drugs (NSAIDs) in patients with COVID-19. *World*  
9 476 *Health Organization* 2020  
10 477 33. Surveillances V. The epidemiological characteristics of an outbreak of 2019 novel coronavirus  
11 478 diseases (COVID-19)—China, 2020. *China CDC Weekly* 2020;2(8):113-22.  
12 479 34. Organization WH. Getting your workplace ready for COVID-19: How COVID-19 spreads, 19 March  
13 480 2020: World Health Organization, 2020.  
14 481 35. Best M, Neuhauser D. Ignaz Semmelweis and the birth of infection control. *Quality & safety in*  
15 482 *health care* 2004;13:233-4. doi: 10.1136/qhc.13.3.233  
16 483 36. Rabie T, Curtis V. Handwashing and Risk of Respiratory Infections: A Quantitative Systematic  
17 484 Review. *Tropical medicine & international health : TM & IH* 2006;11:258-67. doi:  
18 485 10.1111/j.1365-3156.2006.01568.x  
19 486 37. Practical considerations and recommendations for religious leaders and faith-based communities  
20 487 in the context of COVID-19. *World Health Organization* 2020  
21 488 38. Safe Ramadan practices in the context of the COVID-19 *World Health Organization* 2020  
22 489 39. Jefferson T, Foxlee R, Del Mar C, et al. Physical interventions to interrupt or reduce the spread of  
23 490 respiratory viruses: systematic review. *Bmj* 2008;336(7635):77-80.

491

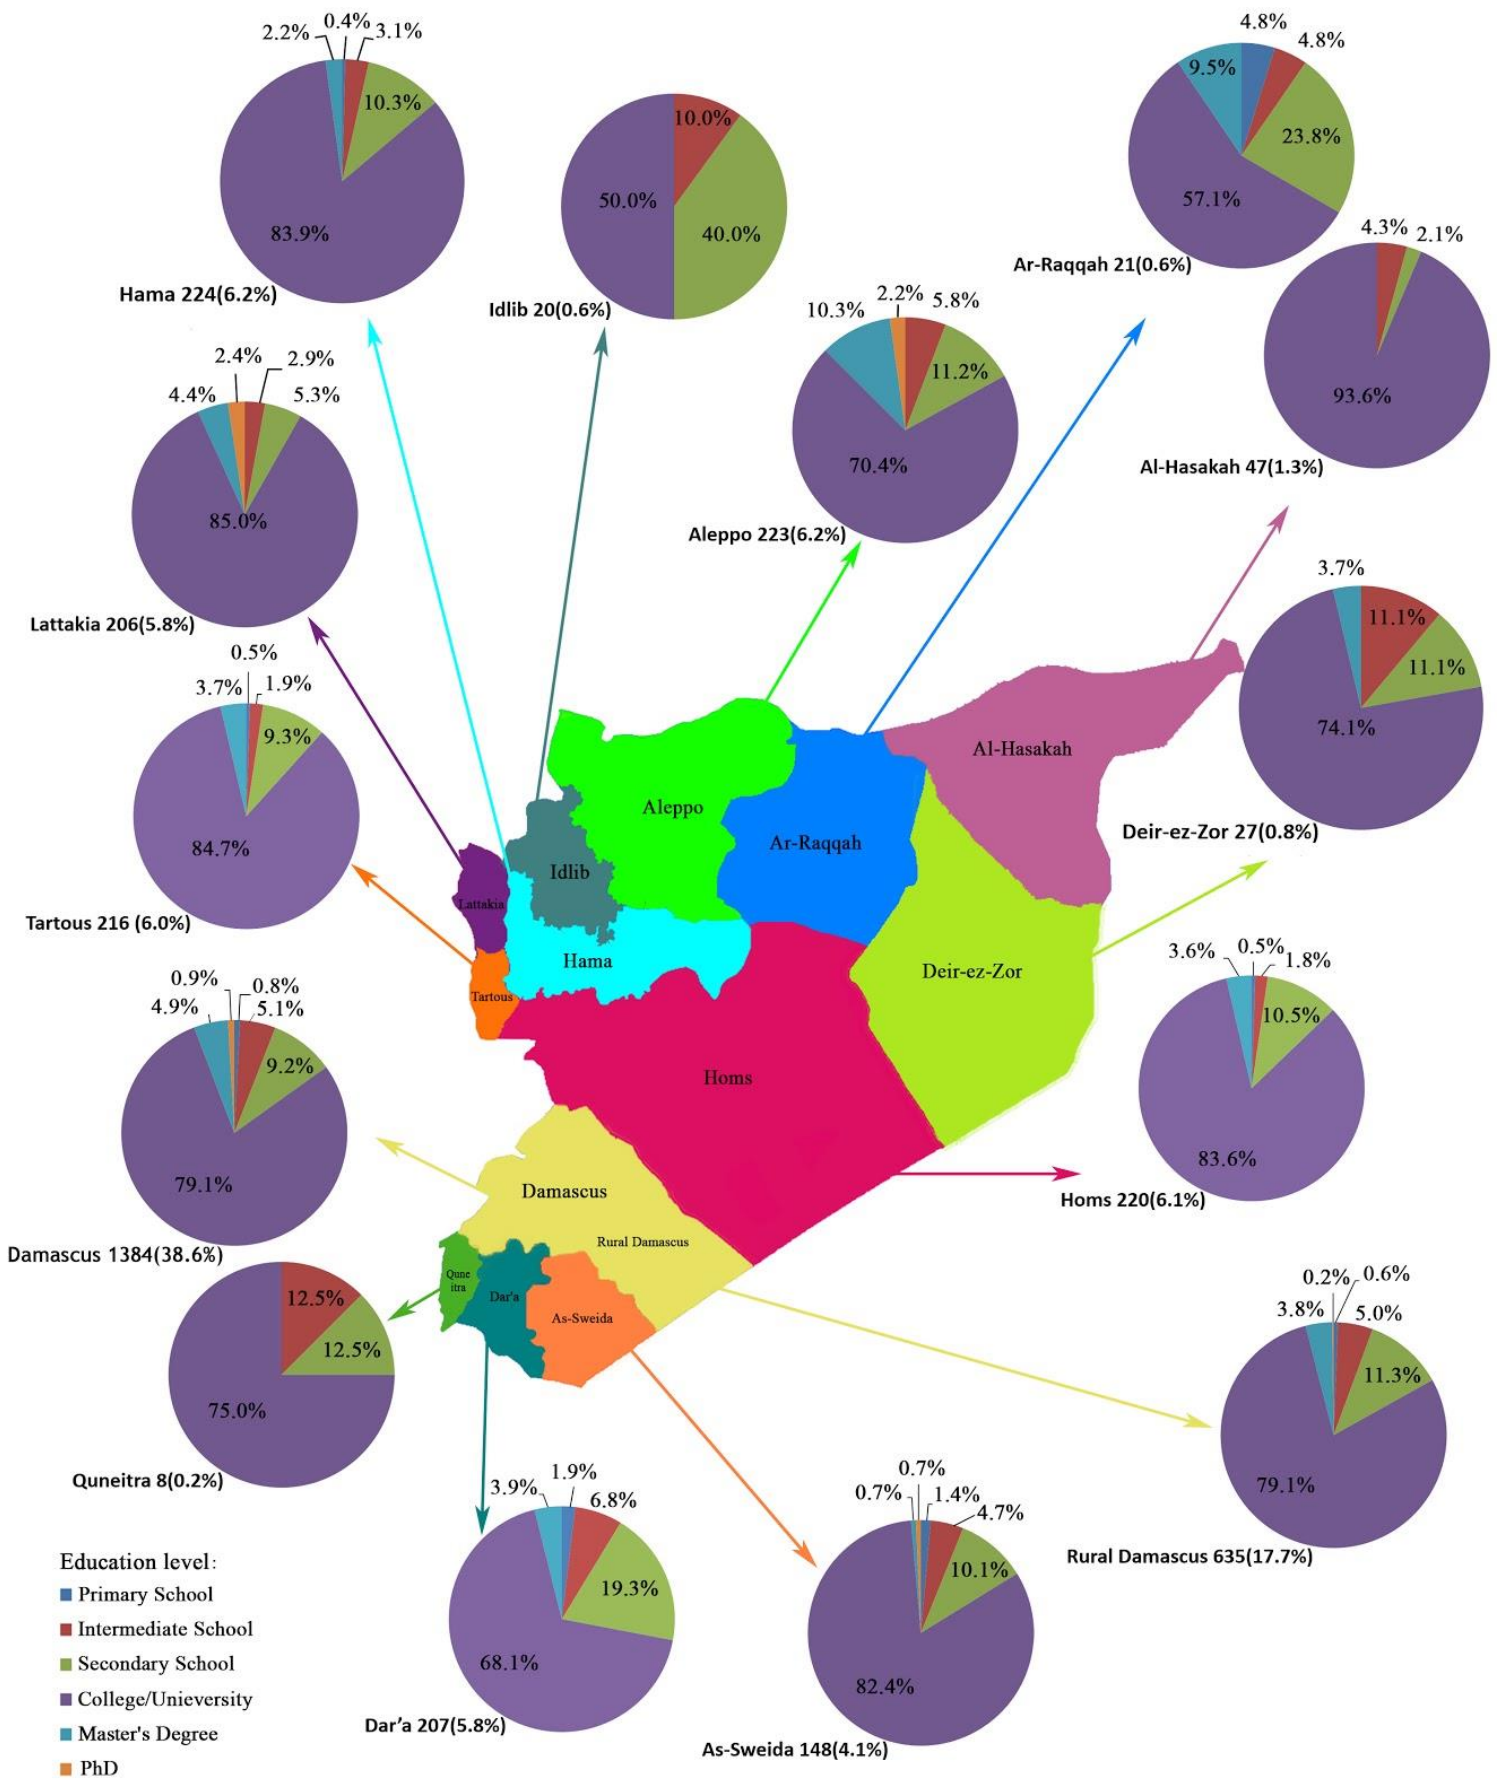

**Figure 1.** Distribution of participants according to governorates and education level

1 **Attached Survey:**

2 **Appendix 1**

| Socio-demographic Characteristics                                                                                                                                                                                                                                                                           |                                                                                                                                                                                                                                                                                                                                                                                                                                                                                                  |
|-------------------------------------------------------------------------------------------------------------------------------------------------------------------------------------------------------------------------------------------------------------------------------------------------------------|--------------------------------------------------------------------------------------------------------------------------------------------------------------------------------------------------------------------------------------------------------------------------------------------------------------------------------------------------------------------------------------------------------------------------------------------------------------------------------------------------|
| <b>Age (years):</b><br><input type="checkbox"/> Below 15 <input type="checkbox"/> 15-20 <input type="checkbox"/> 20-30 <input type="checkbox"/> 30-50<br><input type="checkbox"/> 40-50 <input type="checkbox"/> 50-60 <input type="checkbox"/> 60-70<br><input type="checkbox"/> Above 70                  | <b>Gender:</b><br><input type="checkbox"/> Male<br><input type="checkbox"/> Female                                                                                                                                                                                                                                                                                                                                                                                                               |
| <b>Marital status:</b><br><input type="checkbox"/> Single <input type="checkbox"/> Relationship <input type="checkbox"/> Married<br><input type="checkbox"/> Divorced <input type="checkbox"/> Widowed                                                                                                      | <b>Educational level:</b><br><input type="checkbox"/> Primary school <input type="checkbox"/> Intermediate school<br><input type="checkbox"/> Secondary school <input type="checkbox"/> University/College<br><input type="checkbox"/> Master's Degree <input type="checkbox"/> PHD Degree                                                                                                                                                                                                       |
| <b>Occupation:</b><br><input type="checkbox"/> Health care worker <input type="checkbox"/> Government institution<br><input type="checkbox"/> Private institution <input type="checkbox"/> Business<br><input type="checkbox"/> Military <input type="checkbox"/> Unemployed <input type="checkbox"/> Other | <b>Residence:</b><br><input type="checkbox"/> Damascus/Rural Damascus <input type="checkbox"/> Hama<br><input type="checkbox"/> Aleppo <input type="checkbox"/> Homs <input type="checkbox"/> Tartous <input type="checkbox"/> Lattakia<br><input type="checkbox"/> Dara'a <input type="checkbox"/> As-Sweida <input type="checkbox"/> Al Hasakah<br><input type="checkbox"/> Deir-ez-Zor <input type="checkbox"/> Idlib <input type="checkbox"/> Ar-Raqqah<br><input type="checkbox"/> Quneitra |
| <b>Area:</b><br><input type="checkbox"/> Rural <input type="checkbox"/> Urban                                                                                                                                                                                                                               | <b>Economic Status:</b><br><input type="checkbox"/> Excellent <input type="checkbox"/> Good <input type="checkbox"/> Moderate<br><input type="checkbox"/> Poor                                                                                                                                                                                                                                                                                                                                   |
| <b>Do you smoke?</b><br><input type="checkbox"/> Yes <input type="checkbox"/> No                                                                                                                                                                                                                            | <b>Do you drink alcohol?</b><br><input type="checkbox"/> Yes <input type="checkbox"/> No                                                                                                                                                                                                                                                                                                                                                                                                         |
| <b>How many people do you live with?</b><br><input type="checkbox"/> Alone <input type="checkbox"/> 1-5 <input type="checkbox"/> 6-10 <input type="checkbox"/> 11-15 <input type="checkbox"/> 16-20 <input type="checkbox"/> Above 20                                                                       |                                                                                                                                                                                                                                                                                                                                                                                                                                                                                                  |
|                                                                                                                                                                                                                                                                                                             |                                                                                                                                                                                                                                                                                                                                                                                                                                                                                                  |
| <b>Do you share toiletries/personal care products with others?</b><br><input type="checkbox"/> Yes <input type="checkbox"/> No                                                                                                                                                                              |                                                                                                                                                                                                                                                                                                                                                                                                                                                                                                  |
| <b>Do you know anyone infected with COVID-19?</b><br><input type="checkbox"/> Yes <input type="checkbox"/> No                                                                                                                                                                                               |                                                                                                                                                                                                                                                                                                                                                                                                                                                                                                  |

4  
5  
6  
7  
8  
9  
10  
11  
12  
13  
14  
15  
16  
17  
18  
19  
20  
21  
22  
23  
24  
25  
26  
27  
28  
29  
30  
31  
32  
33  
34  
35  
36  
37  
38  
39  
40  
41  
42  
43  
44  
45  
46  
47  
48  
49  
50  
51  
52  
53  
54  
55  
56  
57 **Table 2. General Knowledge about COVID-19**



|                                                                                                                                                                                                                                                                                                               |                                                                                                                                                                                                                                                                                                                                                           |           |                    |
|---------------------------------------------------------------------------------------------------------------------------------------------------------------------------------------------------------------------------------------------------------------------------------------------------------------|-----------------------------------------------------------------------------------------------------------------------------------------------------------------------------------------------------------------------------------------------------------------------------------------------------------------------------------------------------------|-----------|--------------------|
| <b>What is COVID-19?</b><br><input checked="" type="checkbox"/> Virus<br><input type="checkbox"/> Parasite<br><input type="checkbox"/> Immunodeficiency<br><input type="checkbox"/> Do not know<br><input type="checkbox"/> Bacteria<br><input type="checkbox"/> Fungus<br><input type="checkbox"/> Inherited | <b>Do you know how long after being infected with COVID-19 can a person suffer from signs and symptoms?</b><br><input type="checkbox"/> 1 Minute to 1 Hour<br><input type="checkbox"/> 1 Hour to 2 Days<br><input checked="" type="checkbox"/> 2 Days to 2 weeks<br><input type="checkbox"/> 2 Weeks to 1Month<br><input type="checkbox"/> Over a 1 month |           |                    |
| <b>Can an infection with COVID-19 confer permanent immunity (once infected with COVID-19 you cannot contract another infection)?</b><br><input type="checkbox"/> Yes <input checked="" type="checkbox"/> No <input type="checkbox"/> Do not know                                                              |                                                                                                                                                                                                                                                                                                                                                           |           |                    |
| <b>Can COVID-19 cause severe illness and lead to death in elderly, chronically ill (hypertension, diabetes, asthma . . .), and those who have compromised immune systems?</b><br><input checked="" type="checkbox"/> Yes <input type="checkbox"/> No <input type="checkbox"/> Do not know                     |                                                                                                                                                                                                                                                                                                                                                           |           |                    |
| <b>Can COVID-19 cause infertility?</b><br><input type="checkbox"/> Yes <input type="checkbox"/> No <input checked="" type="checkbox"/> Do not know                                                                                                                                                            |                                                                                                                                                                                                                                                                                                                                                           |           |                    |
| <b>Is COVID-19 teratogenic (i.e. cause malformations/abnormalities to an embryo/fetus)?</b><br><input type="checkbox"/> Yes <input checked="" type="checkbox"/> No <input type="checkbox"/> Do not know                                                                                                       |                                                                                                                                                                                                                                                                                                                                                           |           |                    |
| <b>Treatment for COVID-19</b>                                                                                                                                                                                                                                                                                 |                                                                                                                                                                                                                                                                                                                                                           |           |                    |
|                                                                                                                                                                                                                                                                                                               | <b>Yes</b>                                                                                                                                                                                                                                                                                                                                                | <b>No</b> | <b>Do Not Know</b> |
| <b>No treatment available</b>                                                                                                                                                                                                                                                                                 | ✓                                                                                                                                                                                                                                                                                                                                                         |           |                    |
| <b>Antibiotics</b>                                                                                                                                                                                                                                                                                            |                                                                                                                                                                                                                                                                                                                                                           | ✓         |                    |
| <b>Ibuprofen</b>                                                                                                                                                                                                                                                                                              |                                                                                                                                                                                                                                                                                                                                                           | ✓         |                    |
| <b>Is there an available vaccine for COVID-19?</b><br><input type="checkbox"/> Yes <input checked="" type="checkbox"/> No <input type="checkbox"/> Do not know                                                                                                                                                |                                                                                                                                                                                                                                                                                                                                                           |           |                    |

6  
7

| <b>Table 3. Transmission Pathways</b>                                                                       |            |           |                    |
|-------------------------------------------------------------------------------------------------------------|------------|-----------|--------------------|
|                                                                                                             | <b>Yes</b> | <b>No</b> | <b>Do Not Know</b> |
| <b>Can COVID-19 be transmitted via respiratory droplets (coughing or sneezing) of infected individuals?</b> | ✓          |           |                    |
| <b>Can COVID-19 be transmitted after shaking-hands with an infected individual?</b>                         | ✓          |           |                    |

|                                                                                          |   |  |   |
|------------------------------------------------------------------------------------------|---|--|---|
| Can COVID-19 be transmitted after touching an infected individual's personal belongings? | ✓ |  |   |
| Can COVID-19 be transmitted from animals to humans?                                      |   |  | ✓ |
| Can COVID-19 be transmitted via undercooked food?                                        |   |  | ✓ |
| Can COVID-19 be transmitted via sexual contact?                                          |   |  | ✓ |
| Can COVID-19 be transmitted via vertical transmission (mother to fetus)?                 | ✓ |  |   |

**Table 4. Signs and Symptoms of COVID-19**

|                                                                            | True | False | Do Not Know |
|----------------------------------------------------------------------------|------|-------|-------------|
| Is fever/temperature among the signs and symptoms of COVID-19?             | ✓    |       |             |
| Is sneezing among the signs and symptoms of COVID-19?                      | ✓    |       |             |
| Is sore throat among the signs and symptoms of COVID-19?                   | ✓    |       |             |
| Is headache among the signs and symptoms of COVID-19?                      | ✓    |       |             |
| Is Chest pain among the signs and symptoms of COVID-19?                    | ✓    |       |             |
| Is body aches (generalized pain) among the signs and symptoms of COVID-19? | ✓    |       |             |
| Is fatigue among the signs and symptoms of COVID-19?                       | ✓    |       |             |
| Is diarrhea among the signs and symptoms of COVID-19?                      | ✓    |       |             |
| Is a runny nose among the signs and symptoms of COVID-19?                  | ✓    |       |             |
| Is dry cough among the signs and symptoms of COVID-19?                     | ✓    |       |             |
| Is productive cough among the signs and symptoms of COVID-19?              | ✓    |       |             |
| Is bleeding among the signs and symptoms of COVID-19?                      |      | ✓     |             |
| Can a person be infected with COVID-19 and have no signs and symptoms?     | ✓    |       |             |



**Table 5. Prevention Methods**

|                                                                                                                                                                                                                                                                                                                                                                                                                                       | True | False | Do Not Know |
|---------------------------------------------------------------------------------------------------------------------------------------------------------------------------------------------------------------------------------------------------------------------------------------------------------------------------------------------------------------------------------------------------------------------------------------|------|-------|-------------|
| Does wearing a face mask outside the home offer protection from COVID -19?                                                                                                                                                                                                                                                                                                                                                            | ✓    |       |             |
| Does washing hands with soap and water offer protection from COVID-19?                                                                                                                                                                                                                                                                                                                                                                | ✓    |       |             |
| Does avoiding crowded places offer protection from COVID -19?                                                                                                                                                                                                                                                                                                                                                                         | ✓    |       |             |
| Does the flu vaccine offer protection from COVID -19?                                                                                                                                                                                                                                                                                                                                                                                 |      | ✓     |             |
| Does staying at home offer protection from COVID -19?                                                                                                                                                                                                                                                                                                                                                                                 | ✓    |       |             |
| Does using hand sanitizer offer protection from COVID -19?                                                                                                                                                                                                                                                                                                                                                                            | ✓    |       |             |
| Does using bleach to clean household surfaces prevent COVID-19 infection?                                                                                                                                                                                                                                                                                                                                                             | ✓    |       |             |
| Does cleaning fruits and vegetables with soap and water offer protection from COVID-19?                                                                                                                                                                                                                                                                                                                                               | ✓    |       |             |
| Does cleaning surfaces with a mixture of Flash and bleach offer protection from COVID -19?                                                                                                                                                                                                                                                                                                                                            |      | ✓     |             |
| Does the quarantine of symptomatic individuals protect others from COVID -19?                                                                                                                                                                                                                                                                                                                                                         | ✓    |       |             |
| Do cumin, anise, and mint offer protection from COVID -19?                                                                                                                                                                                                                                                                                                                                                                            |      | ✓     |             |
| <b>What is your main source of information about COVID-19? (You may choose more than one option)</b><br><input type="checkbox"/> Internet (social media platforms)<br><input type="checkbox"/> Internet (Official websites like world health organization)<br><input type="checkbox"/> TV/Radio<br><input type="checkbox"/> Friends/Member of family<br><input type="checkbox"/> Magazines/Books<br><input type="checkbox"/> Lectures |      |       |             |
| <b>If you had new information about COVID-19 would you share it with friends and family to raise awareness?</b><br><input type="checkbox"/> Yes <input type="checkbox"/> No                                                                                                                                                                                                                                                           |      |       |             |

1  
2  
3  
4  
5  
6  
7  
8  
9  
10  
11  
12  
13  
14  
15  
16  
17  
18  
19  
20  
21  
22  
23  
24  
25  
26  
27  
28  
29  
30  
31  
32  
33  
34  
35  
36  
37  
38  
39  
40  
41  
42  
43  
44  
45  
46  
47  
48  
49  
50  
51  
52  
53  
54  
55  
56  
57  
58  
59  
60

12

For peer review only

## STROBE Statement—checklist of items that should be included in reports of observational studies

|                           | Item No | Recommendation                                                                                                                                                                                                                                                                                                                                                                                                                                                         | Page No.                            |
|---------------------------|---------|------------------------------------------------------------------------------------------------------------------------------------------------------------------------------------------------------------------------------------------------------------------------------------------------------------------------------------------------------------------------------------------------------------------------------------------------------------------------|-------------------------------------|
| <b>Title and abstract</b> | 1       | (a) Indicate the study's design with a commonly used term in the title or the abstract                                                                                                                                                                                                                                                                                                                                                                                 | 1                                   |
|                           |         | (b) Provide in the abstract an informative and balanced summary of what was done and what was found                                                                                                                                                                                                                                                                                                                                                                    | 2,3                                 |
| <b>Introduction</b>       |         |                                                                                                                                                                                                                                                                                                                                                                                                                                                                        |                                     |
| Background/rationale      | 2       | Explain the scientific background and rationale for the investigation being reported                                                                                                                                                                                                                                                                                                                                                                                   | 5,6                                 |
| Objectives                | 3       | State specific objectives, including any prespecified hypotheses                                                                                                                                                                                                                                                                                                                                                                                                       | 6                                   |
| <b>Methods</b>            |         |                                                                                                                                                                                                                                                                                                                                                                                                                                                                        |                                     |
| Study design              | 4       | Present key elements of study design early in the paper                                                                                                                                                                                                                                                                                                                                                                                                                | 6,7                                 |
| Setting                   | 5       | Describe the setting, locations, and relevant dates, including periods of recruitment, exposure, follow-up, and data collection                                                                                                                                                                                                                                                                                                                                        | 6,7                                 |
| Participants              | 6       | (a) <i>Cohort study</i> —Give the eligibility criteria, and the sources and methods of selection of participants. Describe methods of follow-up<br><i>Case-control study</i> —Give the eligibility criteria, and the sources and methods of case ascertainment and control selection. Give the rationale for the choice of cases and controls<br><i>Cross-sectional study</i> —Give the eligibility criteria, and the sources and methods of selection of participants | 6,7                                 |
|                           |         | (b) <i>Cohort study</i> —For matched studies, give matching criteria and number of exposed and unexposed<br><i>Case-control study</i> —For matched studies, give matching criteria and the number of controls per case                                                                                                                                                                                                                                                 | Not applicable                      |
| Variables                 | 7       | Clearly define all outcomes, exposures, predictors, potential confounders, and effect modifiers. Give diagnostic criteria, if applicable                                                                                                                                                                                                                                                                                                                               | -                                   |
| Data sources/measurement  | 8*      | For each variable of interest, give sources of data and details of methods of assessment (measurement). Describe comparability of assessment methods if there is more than one group                                                                                                                                                                                                                                                                                   | Not applicable                      |
| Bias                      | 9       | Describe any efforts to address potential sources of bias                                                                                                                                                                                                                                                                                                                                                                                                              | 7                                   |
| Study size                | 10      | Explain how the study size was arrived at                                                                                                                                                                                                                                                                                                                                                                                                                              | 7                                   |
| Quantitative variables    | 11      | Explain how quantitative variables were handled in the analyses. If applicable, describe which groupings were chosen and why                                                                                                                                                                                                                                                                                                                                           | 8                                   |
| Statistical methods       | 12      | (a) Describe all statistical methods, including those used to control for confounding                                                                                                                                                                                                                                                                                                                                                                                  | 8                                   |
|                           |         | (b) Describe any methods used to examine subgroups and interactions                                                                                                                                                                                                                                                                                                                                                                                                    | 8                                   |
|                           |         | (c) Explain how missing data were addressed                                                                                                                                                                                                                                                                                                                                                                                                                            | Not applicable<br>(no missing data) |
|                           |         | (d) <i>Cohort study</i> —If applicable, explain how loss to follow-up                                                                                                                                                                                                                                                                                                                                                                                                  | 8                                   |

1  
2 was addressed

3 *Case-control study*—If applicable, explain how matching of cases  
4 and controls was addressed

5 *Cross-sectional study*—If applicable, describe analytical methods  
6 taking account of sampling strategy

---

7  
8 € Describe any sensitivity analyses -  
9

10 Continued on next page  
11  
12  
13  
14  
15  
16  
17  
18  
19  
20  
21  
22  
23  
24  
25  
26  
27  
28  
29  
30  
31  
32  
33  
34  
35  
36  
37  
38  
39  
40  
41  
42  
43  
44  
45  
46  
47  
48  
49  
50  
51  
52  
53  
54  
55  
56  
57  
58  
59  
60

For peer review only

| <b>Results</b>           |     |                                                                                                                                                                                                              | <b>Page No.</b> |
|--------------------------|-----|--------------------------------------------------------------------------------------------------------------------------------------------------------------------------------------------------------------|-----------------|
| Participants             | 13* | (a) Report numbers of individuals at each stage of study—eg numbers potentially eligible, examined for eligibility, confirmed eligible, included in the study, completing follow-up, and analysed            | 9               |
|                          |     | (b) Give reasons for non-participation at each stage                                                                                                                                                         | -               |
|                          |     | (c) Consider use of a flow diagram                                                                                                                                                                           | -               |
| Descriptive data         | 14* | (a) Give characteristics of study participants (eg demographic, clinical, social) and information on exposures and potential confounders                                                                     | 9               |
|                          |     | (b) Indicate number of participants with missing data for each variable of interest                                                                                                                          | Not applicable  |
|                          |     | © <i>Cohort study</i> —Summarise follow-up time (eg, average and total amount)                                                                                                                               | Not applicable  |
| Outcome data             | 15* | <i>Cohort study</i> —Report numbers of outcome events or summary measures over time                                                                                                                          | -               |
|                          |     | <i>Case-control study</i> —Report numbers in each exposure category, or summary measures of exposure                                                                                                         | -               |
|                          |     | <i>Cross-sectional study</i> —Report numbers of outcome events or summary measures                                                                                                                           | 29-35           |
| Main results             | 16  | (a) Give unadjusted estimates and, if applicable, confounder-adjusted estimates and their precision (eg, 95% confidence interval). Make clear which confounders were adjusted for and why they were included | 34,35           |
|                          |     | (b) Report category boundaries when continuous variables were categorized                                                                                                                                    | 29-33           |
|                          |     | (c) If relevant, consider translating estimates of relative risk into absolute risk for a meaningful time period                                                                                             | Not applicable  |
| Other analyses           | 17  | Report other analyses done—eg analyses of subgroups and interactions, and sensitivity analyses                                                                                                               |                 |
| <b>Discussion</b>        |     |                                                                                                                                                                                                              |                 |
| Key results              | 18  | Summarise key results with reference to study objectives                                                                                                                                                     | 13-15           |
| Limitations              | 19  | Discuss limitations of the study, taking into account sources of potential bias or imprecision. Discuss both direction and magnitude of any potential bias                                                   | 16              |
| Interpretation           | 20  | Give a cautious overall interpretation of results considering objectives, limitations, multiplicity of analyses, results from similar studies, and other relevant evidence                                   | 17              |
| Generalisability         | 21  | Discuss the generalisability (external validity) of the study results                                                                                                                                        | 16              |
| <b>Other information</b> |     |                                                                                                                                                                                                              |                 |
| Funding                  | 22  | Give the source of funding and the role of the funders for the present study and, if applicable, for the original study on which the present article is based                                                | 17              |

\*Give information separately for cases and controls in case-control studies and, if applicable, for exposed and unexposed groups in cohort and cross-sectional studies.

**Note:** An Explanation and Elaboration article discusses each checklist item and gives methodological background and published examples of transparent reporting. The STROBE checklist is best used in conjunction with this article (freely available on the Web sites of PLoS Medicine at <http://www.plosmedicine.org/>, Annals of Internal Medicine at <http://www.annals.org/>, and Epidemiology at <http://www.epidem.com/>). Information on the STROBE Initiative is available at [www.strobe-statement.org](http://www.strobe-statement.org).
