# Supplementary material for: Crisis within a crisis, COVID-19 knowledge and awareness among the Syrian population: a cross-sectional study
Source: HighWire-hosted journal article supplement (doi:10.1136/bmjopen-2020-043305), 2021-04-01
Supplement: bmjopen-2020-043305supp001_data_supplement.pdf [file bmjopen-2020-043305supp001_data_supplement.pdf]

1 **Attached Survey:**2 **Appendix 1**

3

| <b>Socio-demographic Characteristics</b>                                                                                                                                                                                                                                                                    |                                                                                                                                                                                                                                                                                                                                                                                                                                                                                                  |
|-------------------------------------------------------------------------------------------------------------------------------------------------------------------------------------------------------------------------------------------------------------------------------------------------------------|--------------------------------------------------------------------------------------------------------------------------------------------------------------------------------------------------------------------------------------------------------------------------------------------------------------------------------------------------------------------------------------------------------------------------------------------------------------------------------------------------|
| <b>Age (years):</b><br><input type="checkbox"/> Below 15 <input type="checkbox"/> 15-20 <input type="checkbox"/> 20-30 <input type="checkbox"/> 30-50<br><input type="checkbox"/> 40-50 <input type="checkbox"/> 50-60 <input type="checkbox"/> 60-70<br><input type="checkbox"/> Above 70                  | <b>Gender:</b><br><input type="checkbox"/> Male<br><input type="checkbox"/> Female                                                                                                                                                                                                                                                                                                                                                                                                               |
| <b>Marital status:</b><br><input type="checkbox"/> Single <input type="checkbox"/> Relationship <input type="checkbox"/> Married<br><input type="checkbox"/> Divorced <input type="checkbox"/> Widowed                                                                                                      | <b>Educational level:</b><br><input type="checkbox"/> Primary school <input type="checkbox"/> Intermediate school<br><input type="checkbox"/> Secondary school <input type="checkbox"/> University/College<br><input type="checkbox"/> Master's Degree <input type="checkbox"/> PHD Degree                                                                                                                                                                                                       |
| <b>Occupation:</b><br><input type="checkbox"/> Health care worker <input type="checkbox"/> Government institution<br><input type="checkbox"/> Private institution <input type="checkbox"/> Business<br><input type="checkbox"/> Military <input type="checkbox"/> Unemployed <input type="checkbox"/> Other | <b>Residence:</b><br><input type="checkbox"/> Damascus/Rural Damascus <input type="checkbox"/> Hama<br><input type="checkbox"/> Aleppo <input type="checkbox"/> Homs <input type="checkbox"/> Tartous <input type="checkbox"/> Lattakia<br><input type="checkbox"/> Dara'a <input type="checkbox"/> As-Sweida <input type="checkbox"/> Al Hasakah<br><input type="checkbox"/> Deir-ez-Zor <input type="checkbox"/> Idlib <input type="checkbox"/> Ar-Raqqah<br><input type="checkbox"/> Quneitra |
| <b>Area:</b><br><input type="checkbox"/> Rural <input type="checkbox"/> Urban                                                                                                                                                                                                                               | <b>Economic Status:</b><br><input type="checkbox"/> Excellent <input type="checkbox"/> Good <input type="checkbox"/> Moderate<br><input type="checkbox"/> Poor                                                                                                                                                                                                                                                                                                                                   |
| <b>Do you smoke?</b><br><input type="checkbox"/> Yes <input type="checkbox"/> No                                                                                                                                                                                                                            | <b>Do you drink alcohol?</b><br><input type="checkbox"/> Yes <input type="checkbox"/> No                                                                                                                                                                                                                                                                                                                                                                                                         |
| <b>How many people do you live with?</b><br><input type="checkbox"/> Alone <input type="checkbox"/> 1-5 <input type="checkbox"/> 6-10 <input type="checkbox"/> 11-15 <input type="checkbox"/> 16-20 <input type="checkbox"/> Above 20                                                                       |                                                                                                                                                                                                                                                                                                                                                                                                                                                                                                  |
| <b>Do you share toiletries/personal care products with others?</b><br><input type="checkbox"/> Yes <input type="checkbox"/> No                                                                                                                                                                              |                                                                                                                                                                                                                                                                                                                                                                                                                                                                                                  |
| <b>Do you know anyone infected with COVID-19?</b><br><input type="checkbox"/> Yes <input type="checkbox"/> No                                                                                                                                                                                               |                                                                                                                                                                                                                                                                                                                                                                                                                                                                                                  |

4

5

|                                                  |
|--------------------------------------------------|
| <b>Table 2. General Knowledge about COVID-19</b> |
|--------------------------------------------------|

|                                                                                                                                                                                                                                                                                                      |     |                                                                                                                                                                                                                                                                                                                                                     |             |
|------------------------------------------------------------------------------------------------------------------------------------------------------------------------------------------------------------------------------------------------------------------------------------------------------|-----|-----------------------------------------------------------------------------------------------------------------------------------------------------------------------------------------------------------------------------------------------------------------------------------------------------------------------------------------------------|-------------|
| <b>What is COVID-19?</b><br><input checked="" type="checkbox"/> Virus <input type="checkbox"/> Bacteria<br><input type="checkbox"/> Parasite <input type="checkbox"/> Fungus<br><input type="checkbox"/> Immunodeficiency <input type="checkbox"/> Inherited<br><input type="checkbox"/> Do not know |     | <b>Do you know how long after being infected with COVID-19 can a person suffer from signs and symptoms?</b><br><input type="checkbox"/> 1 Minute to 1 Hour <input type="checkbox"/> 1 Hour to 2 Days<br><input checked="" type="checkbox"/> 2 Days to 2 weeks <input type="checkbox"/> 2 Weeks to 1Month<br><input type="checkbox"/> Over a 1 month |             |
| <b>Can an infection with COVID-19 confer permanent immunity (once infected with COVID-19 you cannot contract another infection)?</b><br><input type="checkbox"/> Yes <input checked="" type="checkbox"/> No <input type="checkbox"/> Do not know                                                     |     |                                                                                                                                                                                                                                                                                                                                                     |             |
| <b>Can COVID-19 cause severe illness and lead to death in elderly, chronically ill (hypertension, diabetes, asthma . . .), and those who have compromised immune systems?</b><br><input checked="" type="checkbox"/> Yes <input type="checkbox"/> No <input type="checkbox"/> Do not know            |     |                                                                                                                                                                                                                                                                                                                                                     |             |
| <b>Can COVID-19 cause infertility?</b><br><input type="checkbox"/> Yes <input type="checkbox"/> No <input checked="" type="checkbox"/> Do not know                                                                                                                                                   |     |                                                                                                                                                                                                                                                                                                                                                     |             |
| <b>Is COVID-19 teratogenic (i.e. cause malformations/abnormalities to an embryo/fetus)?</b><br><input type="checkbox"/> Yes <input checked="" type="checkbox"/> No <input type="checkbox"/> Do not know                                                                                              |     |                                                                                                                                                                                                                                                                                                                                                     |             |
| <b>Treatment for COVID-19</b>                                                                                                                                                                                                                                                                        |     |                                                                                                                                                                                                                                                                                                                                                     |             |
|                                                                                                                                                                                                                                                                                                      | Yes | No                                                                                                                                                                                                                                                                                                                                                  | Do Not Know |
| <b>No treatment available</b>                                                                                                                                                                                                                                                                        | ✓   |                                                                                                                                                                                                                                                                                                                                                     |             |
| <b>Antibiotics</b>                                                                                                                                                                                                                                                                                   |     | ✓                                                                                                                                                                                                                                                                                                                                                   |             |
| <b>Ibuprofen</b>                                                                                                                                                                                                                                                                                     |     | ✓                                                                                                                                                                                                                                                                                                                                                   |             |
| <b>Is there an available vaccine for COVID-19?</b><br><input type="checkbox"/> Yes <input checked="" type="checkbox"/> No <input type="checkbox"/> Do not know                                                                                                                                       |     |                                                                                                                                                                                                                                                                                                                                                     |             |

6  
7

| Table 3. Transmission Pathways                                                                              |     |    |             |
|-------------------------------------------------------------------------------------------------------------|-----|----|-------------|
|                                                                                                             | Yes | No | Do Not Know |
| <b>Can COVID-19 be transmitted via respiratory droplets (coughing or sneezing) of infected individuals?</b> | ✓   |    |             |
| <b>Can COVID-19 be transmitted after shaking-hands with an infected individual?</b>                         | ✓   |    |             |

|                                                                                          |   |  |   |
|------------------------------------------------------------------------------------------|---|--|---|
| Can COVID-19 be transmitted after touching an infected individual's personal belongings? | ✓ |  |   |
| Can COVID-19 be transmitted from animals to humans?                                      |   |  | ✓ |
| Can COVID-19 be transmitted via undercooked food?                                        |   |  | ✓ |
| Can COVID-19 be transmitted via sexual contact?                                          |   |  | ✓ |
| Can COVID-19 be transmitted via vertical transmission (mother to fetus)?                 | ✓ |  |   |

8  
9

| Table 4. Signs and Symptoms of COVID-19                                    |      |       |             |
|----------------------------------------------------------------------------|------|-------|-------------|
|                                                                            | True | False | Do Not Know |
| Is fever/temperature among the signs and symptoms of COVID-19?             | ✓    |       |             |
| Is sneezing among the signs and symptoms of COVID-19?                      | ✓    |       |             |
| Is sore throat among the signs and symptoms of COVID-19?                   | ✓    |       |             |
| Is headache among the signs and symptoms of COVID-19?                      | ✓    |       |             |
| Is Chest pain among the signs and symptoms of COVID-19?                    | ✓    |       |             |
| Is body aches (generalized pain) among the signs and symptoms of COVID-19? | ✓    |       |             |
| Is fatigue among the signs and symptoms of COVID-19?                       | ✓    |       |             |
| Is diarrhea among the signs and symptoms of COVID-19?                      | ✓    |       |             |
| Is a runny nose among the signs and symptoms of COVID-19?                  | ✓    |       |             |
| Is dry cough among the signs and symptoms of COVID-19?                     | ✓    |       |             |
| Is productive cough among the signs and symptoms of COVID-19?              | ✓    |       |             |
| Is bleeding among the signs and symptoms of COVID-19?                      |      | ✓     |             |
| Can a person be infected with COVID-19 and have no signs and symptoms?     | ✓    |       |             |

10  
11

| <b>Table 5. Prevention Methods</b>                                                                                                                                                                                                                                                                                                                                                                                                    |             |              |                    |
|---------------------------------------------------------------------------------------------------------------------------------------------------------------------------------------------------------------------------------------------------------------------------------------------------------------------------------------------------------------------------------------------------------------------------------------|-------------|--------------|--------------------|
|                                                                                                                                                                                                                                                                                                                                                                                                                                       | <b>True</b> | <b>False</b> | <b>Do Not Know</b> |
| <b>Does wearing a face mask outside the home offer protection from COVID -19?</b>                                                                                                                                                                                                                                                                                                                                                     | ✓           |              |                    |
| <b>Does washing hands with soap and water offer protection from COVID-19?</b>                                                                                                                                                                                                                                                                                                                                                         | ✓           |              |                    |
| <b>Does avoiding crowded places offer protection from COVID -19?</b>                                                                                                                                                                                                                                                                                                                                                                  | ✓           |              |                    |
| <b>Does the flu vaccine offer protection from COVID -19?</b>                                                                                                                                                                                                                                                                                                                                                                          |             | ✓            |                    |
| <b>Does staying at home offer protection from COVID -19?</b>                                                                                                                                                                                                                                                                                                                                                                          | ✓           |              |                    |
| <b>Does using hand sanitizer offer protection from COVID -19?</b>                                                                                                                                                                                                                                                                                                                                                                     | ✓           |              |                    |
| <b>Does using bleach to clean household surfaces prevent COVID-19 infection?</b>                                                                                                                                                                                                                                                                                                                                                      | ✓           |              |                    |
| <b>Does cleaning fruits and vegetables with soap and water offer protection from COVID-19?</b>                                                                                                                                                                                                                                                                                                                                        | ✓           |              |                    |
| <b>Does cleaning surfaces with a mixture of Flash and bleach offer protection from COVID -19?</b>                                                                                                                                                                                                                                                                                                                                     |             | ✓            |                    |
| <b>Does the quarantine of symptomatic individuals protect others from COVID -19?</b>                                                                                                                                                                                                                                                                                                                                                  | ✓           |              |                    |
| <b>Do cumin, anise, and mint offer protection from COVID -19?</b>                                                                                                                                                                                                                                                                                                                                                                     |             | ✓            |                    |
| <b>What is your main source of information about COVID-19? (You may choose more than one option)</b><br><input type="checkbox"/> Internet (social media platforms)<br><input type="checkbox"/> Internet (Official websites like world health organization)<br><input type="checkbox"/> TV/Radio<br><input type="checkbox"/> Friends/Member of family<br><input type="checkbox"/> Magazines/Books<br><input type="checkbox"/> Lectures |             |              |                    |
| <b>If you had new information about COVID-19 would you share it with friends and family to raise awareness?</b><br><input type="checkbox"/> Yes <input type="checkbox"/> No                                                                                                                                                                                                                                                           |             |              |                    |

12

5
